# Supplementary material for: Structural analysis reveals the formation and role of RNA G-quadruplex structures in human mature microRNAs
Source: Royal Society of Chemistry journal article supplement (doi:10.1039/c8cc04635b), 2018-01-01
Supplement: c8cc04635b2.xlsx [file c8cc04635b2.xlsx]

## Sheet: Table S1. rG4s in mature miRNA
organism	miRNA id	full sequence	length	G4NN	NumG4_G2L12	G4sequence_G2L12	startpos_G2L12	G4length_G2L12
Homo sapiens	hsa-let-7a-2-3p	CUGUACAGCCUCCUAGCUUUCC	22	0.000671124	0	0	0	0
Homo sapiens	hsa-let-7a-3p	CUAUACAAUCUACUGUCUUUC	21	0.00104591	0	0	0	0
Homo sapiens	hsa-let-7a-5p	UGAGGUAGUAGGUUGUAUAGUU	22	0.227414	0	0	0	0
Homo sapiens	hsa-let-7b-3p	CUAUACAACCUACUGCCUUCCC	22	0.000521932	0	0	0	0
Homo sapiens	hsa-let-7b-5p	UGAGGUAGUAGGUUGUGUGGUU	22	0.809904	0	0	0	0
Homo sapiens	hsa-let-7c-3p	CUGUACAACCUUCUAGCUUUCC	22	0.00188233	0	0	0	0
Homo sapiens	hsa-let-7c-5p	UGAGGUAGUAGGUUGUAUGGUU	22	0.196997	0	0	0	0
Homo sapiens	hsa-let-7d-3p	CUAUACGACCUGCUGCCUUUCU	22	0.00110799	0	0	0	0
Homo sapiens	hsa-let-7d-5p	AGAGGUAGUAGGUUGCAUAGUU	22	0.618762	0	0	0	0
Homo sapiens	hsa-let-7e-3p	CUAUACGGCCUCCUAGCUUUCC	22	0.000230692	0	0	0	0
Homo sapiens	hsa-let-7e-5p	UGAGGUAGGAGGUUGUAUAGUU	22	0.307441	0	0	0	0
Homo sapiens	hsa-let-7f-1-3p	CUAUACAAUCUAUUGCCUUCCC	22	0.00011879	0	0	0	0
Homo sapiens	hsa-let-7f-2-3p	CUAUACAGUCUACUGUCUUUCC	22	0.000446799	0	0	0	0
Homo sapiens	hsa-let-7f-5p	UGAGGUAGUAGAUUGUAUAGUU	22	0.0357377	0	0	0	0
Homo sapiens	hsa-let-7g-3p	CUGUACAGGCCACUGCCUUGC	21	0.108046	0	0	0	0
Homo sapiens	hsa-let-7g-5p	UGAGGUAGUAGUUUGUACAGUU	22	0.0893283	0	0	0	0
Homo sapiens	hsa-let-7i-3p	CUGCGCAAGCUACUGCCUUGCU	22	0.0820189	0	0	0	0
Homo sapiens	hsa-let-7i-5p	UGAGGUAGUAGUUUGUGCUGUU	22	0.136552	0	0	0	0
Homo sapiens	hsa-miR-1-3p	UGGAAUGUAAAGAAGUAUGUAU	22	0.00438694	0	0	0	0
Homo sapiens	hsa-miR-1-5p	ACAUACUUCUUUAUAUGCCCAU	22	0.000263233	0	0	0	0
Homo sapiens	hsa-miR-100-3p	CAAGCUUGUAUCUAUAGGUAUG	22	0.00188786	0	0	0	0
Homo sapiens	hsa-miR-100-5p	AACCCGUAGAUCCGAACUUGUG	22	0.0117834	0	0	0	0
Homo sapiens	hsa-miR-101-2-5p	UCGGUUAUCAUGGUACCGAUGC	22	0.0414424	0	0	0	0
Homo sapiens	hsa-miR-101-3p	UACAGUACUGUGAUAACUGAA	21	0.402087	0	0	0	0
Homo sapiens	hsa-miR-101-5p	CAGUUAUCACAGUGCUGAUGCU	22	0.0809659	0	0	0	0
Homo sapiens	hsa-miR-10226	CCAUGUGUCUGGGCUGGGAAAC	22	0.805308	0	0	0	0
Homo sapiens	hsa-miR-10392-3p	CCGGCCCCGCCUCGGCUCCGCACC	24	0.00283765	0	0	0	0
Homo sapiens	hsa-miR-10392-5p	GCGCUUCGACGGGCUGGGCUGUG	23	0.647792	0	0	0	0
Homo sapiens	hsa-miR-10393-3p	UGGUCAGAUUUGAACUCUUCAA	22	0.00246892	0	0	0	0
Homo sapiens	hsa-miR-10393-5p	AGAAUUCUCUUAUCCAACAUCAACA	25	0.00295713	0	0	0	0
Homo sapiens	hsa-miR-10394-3p	UGGGCGCGCCGGGACUGUGAGAC	23	0.418498	0	0	0	0
Homo sapiens	hsa-miR-10394-5p	UCUGCAGGUCCUGGUGAACGCCAU	24	0.175264	0	0	0	0
Homo sapiens	hsa-miR-10395-3p	AUGUAUUCGUACUGUCUGAUG	21	0.01079	0	0	0	0
Homo sapiens	hsa-miR-10395-5p	GUGAUGGAGAGCAAUACC	18	0.179234	0	0	0	0
Homo sapiens	hsa-miR-10396a-3p	GGCCCCGGGCCCUCGACCGGG	21	0.00456988	0	0	0	0
Homo sapiens	hsa-miR-10396a-5p	GGCGGGGCUCGGAGCCGGG	19	0.833082	1	GGCGGGGCUCGGAGCCGGG	1	19
Homo sapiens	hsa-miR-10396b-3p	GGCCCCGGGCCCUCGACCGGAC	22	0.00340036	0	0	0	0
Homo sapiens	hsa-miR-10396b-5p	CGGCGGGGCUCGGAGCCGGG	20	0.805231	1	GGCGGGGCUCGGAGCCGGG	2	19
Homo sapiens	hsa-miR-10397-3p	CAUAGAUCUCGUCGCUUACUGGGA	24	0.561961	0	0	0	0
Homo sapiens	hsa-miR-10397-5p	UCCUUGACCUGAUGCUGUAGGG	22	0.271379	0	0	0	0
Homo sapiens	hsa-miR-10398-3p	GCCCGGAGAGCUGGGAGCCAG	21	0.019652	0	0	0	0
Homo sapiens	hsa-miR-10398-5p	UGGCUCCCUUCUCUCCGUCUG	21	0.0016388	0	0	0	0
Homo sapiens	hsa-miR-10399-3p	CUCUCGGACAAGCUGUAGGUC	21	0.435684	0	0	0	0
Homo sapiens	hsa-miR-10399-5p	AAUUACAGAUUGUCUCAGAGA	21	0.00457851	0	0	0	0
Homo sapiens	hsa-miR-103a-1-5p	GGCUUCUUUACAGUGCUGCCUUG	23	0.0168066	0	0	0	0
Homo sapiens	hsa-miR-103a-2-5p	AGCUUCUUUACAGUGCUGCCUUG	23	0.0119115	0	0	0	0
Homo sapiens	hsa-miR-103a-3p	AGCAGCAUUGUACAGGGCUAUGA	23	0.0285978	0	0	0	0
Homo sapiens	hsa-miR-103b	UCAUAGCCCUGUACAAUGCUGCU	23	0.0512349	0	0	0	0
Homo sapiens	hsa-miR-10400-3p	CUGGGCUCCCGGACGAGGCGGG	22	0.139665	1	GGGCUCCCGGACGAGGCGGG	3	20
Homo sapiens	hsa-miR-10400-5p	CGGCGGCGGCGGCUCUGGGCG	21	0.602368	1	GGCGGCGGCGGCUCUGGG	2	18
Homo sapiens	hsa-miR-10401-3p	ACCUCGCCGUCCCGCCCGCCG	21	0.00119943	0	0	0	0
Homo sapiens	hsa-miR-10401-5p	CGUGUGGGAAGGCGUGGGGU	20	0.983713	0	0	0	0
Homo sapiens	hsa-miR-105-3p	ACGGAUGUUUGAGCAUGUGCUA	22	0.0774287	0	0	0	0
Homo sapiens	hsa-miR-105-5p	UCAAAUGCUCAGACUCCUGUGGU	23	0.0119427	0	0	0	0
Homo sapiens	hsa-miR-10522-5p	AGAAGAAUUGGCCUACUCAGG	21	0.00696207	0	0	0	0
Homo sapiens	hsa-miR-10523-5p	GACAAUGAUGAGAAGACCUGAGGA	24	0.121579	0	0	0	0
Homo sapiens	hsa-miR-10524-5p	CAGGAUGCCAGCAUAGU	17	0.53931	0	0	0	0
Homo sapiens	hsa-miR-10525-3p	UGACUAUGAUGUGCACCUGAU	21	0.0329098	0	0	0	0
Homo sapiens	hsa-miR-10526-3p	AAAAGGGGGCUGAGGUGGAG	20	0.936266	1	GGGGGCUGAGGUGG	5	14
Homo sapiens	hsa-miR-10527-5p	AAAGCAAAUGUUGGGUGAACGGC	23	0.597538	0	0	0	0
Homo sapiens	hsa-miR-106a-3p	CUGCAAUGUAAGCACUUCUUAC	22	0.166314	0	0	0	0
Homo sapiens	hsa-miR-106a-5p	AAAAGUGCUUACAGUGCAGGUAG	23	0.351237	0	0	0	0
Homo sapiens	hsa-miR-106b-3p	CCGCACUGUGGGUACUUGCUGC	22	0.474626	0	0	0	0
Homo sapiens	hsa-miR-106b-5p	UAAAGUGCUGACAGUGCAGAU	21	0.216521	0	0	0	0
Homo sapiens	hsa-miR-107	AGCAGCAUUGUACAGGGCUAUCA	23	0.0222371	0	0	0	0
Homo sapiens	hsa-miR-10a-3p	CAAAUUCGUAUCUAGGGGAAUA	22	0.090603	0	0	0	0
Homo sapiens	hsa-miR-10a-5p	UACCCUGUAGAUCCGAAUUUGUG	23	0.00139812	0	0	0	0
Homo sapiens	hsa-miR-10b-3p	ACAGAUUCGAUUCUAGGGGAAU	22	0.0976471	0	0	0	0
Homo sapiens	hsa-miR-10b-5p	UACCCUGUAGAACCGAAUUUGUG	23	0.00255706	0	0	0	0
Homo sapiens	hsa-miR-11181-3p	AGGAGGAGGAGGUCAGGC	18	0.805371	1	GGAGGAGGAGGUCAGG	2	16
Homo sapiens	hsa-miR-11181-5p	GUCUGACCAACCUCCUCCCGC	21	0.00271955	0	0	0	0
Homo sapiens	hsa-miR-11399	UUCAGGUCUGGGGCUGAAACCU	22	0.503854	0	0	0	0
Homo sapiens	hsa-miR-11400	UCGGCUGUGUAUCUCUGUGUC	21	0.0573549	0	0	0	0
Homo sapiens	hsa-miR-11401	UCACGUCUGCGGCUGUCACG	20	0.256578	0	0	0	0
Homo sapiens	hsa-miR-1178-3p	UUGCUCACUGUUCUUCCCUAG	21	0.00286184	0	0	0	0
Homo sapiens	hsa-miR-1178-5p	CAGGGUCAGCUGAGCAUG	18	0.359881	0	0	0	0
Homo sapiens	hsa-miR-1179	AAGCAUUCUUUCAUUGGUUGG	21	0.00416965	0	0	0	0
Homo sapiens	hsa-miR-1180-3p	UUUCCGGCUCGCGUGGGUGUGU	22	0.0267857	0	0	0	0
Homo sapiens	hsa-miR-1180-5p	GGACCCACCCGGCCGGGAAUA	21	0.0665393	0	0	0	0
Homo sapiens	hsa-miR-1181	CCGUCGCCGCCACCCGAGCCG	21	0.00572961	0	0	0	0
Homo sapiens	hsa-miR-1182	GAGGGUCUUGGGAGGGAUGUGAC	23	0.964561	0	0	0	0
Homo sapiens	hsa-miR-1183	CACUGUAGGUGAUGGUGAGAGUGGGCA	27	0.507325	0	0	0	0
Homo sapiens	hsa-miR-1184	CCUGCAGCGACUUGAUGGCUUCC	23	0.0316705	0	0	0	0
Homo sapiens	hsa-miR-1185-1-3p	AUAUACAGGGGGAGACUCUUAU	22	0.0548835	0	0	0	0
Homo sapiens	hsa-miR-1185-2-3p	AUAUACAGGGGGAGACUCUCAU	22	0.185975	0	0	0	0
Homo sapiens	hsa-miR-1185-5p	AGAGGAUACCCUUUGUAUGUU	21	0.00169209	0	0	0	0
Homo sapiens	hsa-miR-1193	GGGAUGGUAGACCGGUGACGUGC	23	0.663567	0	0	0	0
Homo sapiens	hsa-miR-1197	UAGGACACAUGGUCUACUUCU	21	0.293532	0	0	0	0
Homo sapiens	hsa-miR-1199-3p	UGCGGCCGGUGCUCAACCUGC	21	0.133563	0	0	0	0
Homo sapiens	hsa-miR-1199-5p	CCUGAGCCCGGGCCGCGCAG	20	0.0314146	0	0	0	0
Homo sapiens	hsa-miR-1200	CUCCUGAGCCAUUCUGAGCCUC	22	0.00272423	0	0	0	0
Homo sapiens	hsa-miR-1202	GUGCCAGCUGCAGUGGGGGAG	21	0.799048	0	0	0	0
Homo sapiens	hsa-miR-1203	CCCGGAGCCAGGAUGCAGCUC	21	0.0636206	0	0	0	0
Homo sapiens	hsa-miR-1204	UCGUGGCCUGGUCUCCAUUAU	21	0.00507536	0	0	0	0
Homo sapiens	hsa-miR-1205	UCUGCAGGGUUUGCUUUGAG	20	0.0119197	0	0	0	0
Homo sapiens	hsa-miR-1206	UGUUCAUGUAGAUGUUUAAGC	21	0.0249539	0	0	0	0
Homo sapiens	hsa-miR-1207-3p	UCAGCUGGCCCUCAUUUC	18	0.000288239	0	0	0	0
Homo sapiens	hsa-miR-1207-5p	UGGCAGGGAGGCUGGGAGGGG	21	0.990729	1	GGCAGGGAGGCUGGGAGGGG	2	20
Homo sapiens	hsa-miR-1208	UCACUGUUCAGACAGGCGGA	20	0.0744315	0	0	0	0
Homo sapiens	hsa-miR-12113	UCUGAACUCUAUGUGGGAUUAG	22	0.068553	0	0	0	0
Homo sapiens	hsa-miR-12114	CAGGUGGAGGUGUGAGGUC	19	0.835149	1	GGUGGAGGUGUGAGG	3	15
Homo sapiens	hsa-miR-12115	UAGUGGAGCUGGGAGGCAGCUCGG	24	0.591775	1	GGAGCUGGGAGGCAGCUCGG	5	20
Homo sapiens	hsa-miR-12116	UUAGGCUUCCCCCUCCUCCUGC	22	0.000326842	0	0	0	0
Homo sapiens	hsa-miR-12117	GAAGUGGAGCACAUCAGUGA	20	0.309675	0	0	0	0
Homo sapiens	hsa-miR-12118	CAAGGAGGAGCGGGGAUUAG	20	0.936242	0	0	0	0
Homo sapiens	hsa-miR-12119	UUCUGAGGGGACGGUAGAUUUGGGG	25	0.395823	0	0	0	0
Homo sapiens	hsa-miR-12120	UAAGGAACGCGGGGCCUUGGUAGAGC	26	0.604039	0	0	0	0
Homo sapiens	hsa-miR-12121	CUGCCACGAGCGUGCGGGCCU	21	0.134891	0	0	0	0
Homo sapiens	hsa-miR-12122	UGUCACAGAUGGCCGGAAGAGACUC	25	0.0272473	0	0	0	0
Homo sapiens	hsa-miR-12123	UUAUUCAUUCACAAAAGCUUUA	22	0.000340747	0	0	0	0
Homo sapiens	hsa-miR-12124	GAGGAAAUGCAGAUGCUGGA	20	0.31512	0	0	0	0
Homo sapiens	hsa-miR-12125	UCUCUCACCUGGCAUAAGCAAU	22	0.24914	0	0	0	0
Homo sapiens	hsa-miR-12126	GACUUGGGGACCAGACCUUUUCUU	24	0.00807189	0	0	0	0
Homo sapiens	hsa-miR-12127	UAGAGGUUCUAAUGGUCCAGGGUUA	25	0.232024	0	0	0	0
Homo sapiens	hsa-miR-12128	UUCAGGGAUGGCGCAUGAAGAGGAGA	26	0.211207	0	0	0	0
Homo sapiens	hsa-miR-12129	GAUGUACUGAACUGGGUCAGAC	22	0.224207	0	0	0	0
Homo sapiens	hsa-miR-12130	CGGGUUGUACCUUUUUUGC	19	0.000261445	0	0	0	0
Homo sapiens	hsa-miR-12131	UUUGGAGAGGUGUACUCCCA	20	0.00100338	0	0	0	0
Homo sapiens	hsa-miR-12132	UAUUACUGUGAGAAUUAUGAUG	22	0.00160491	0	0	0	0
Homo sapiens	hsa-miR-12133	CUUGGCACCAUUAAAAAGUACA	22	0.0976222	0	0	0	0
Homo sapiens	hsa-miR-12135	UAAAGGUUUGUUUGUAAA	18	0.00786295	0	0	0	0
Homo sapiens	hsa-miR-12136	GAAAAAGUCAUGGAGGCC	18	0.103949	0	0	0	0
Homo sapiens	hsa-miR-122-3p	AACGCCAUUAUCACACUAAAUA	22	0.0137344	0	0	0	0
Homo sapiens	hsa-miR-122-5p	UGGAGUGUGACAAUGGUGUUUG	22	0.167329	0	0	0	0
Homo sapiens	hsa-miR-1224-3p	CCCCACCUCCUCUCUCCUCAG	21	0.000335189	0	0	0	0
Homo sapiens	hsa-miR-1224-5p	GUGAGGACUCGGGAGGUGG	19	0.82709	1	GGACUCGGGAGGUGG	5	15
Homo sapiens	hsa-miR-1225-3p	UGAGCCCCUGUGCCGCCCCCAG	22	0.000235548	0	0	0	0
Homo sapiens	hsa-miR-1225-5p	GUGGGUACGGCCCAGUGGGGGG	22	0.901769	1	GGGUACGGCCCAGUGGGGGG	3	20
Homo sapiens	hsa-miR-1226-3p	UCACCAGCCCUGUGUUCCCUAG	22	0.00157608	0	0	0	0
Homo sapiens	hsa-miR-1226-5p	GUGAGGGCAUGCAGGCCUGGAUGGGG	26	0.918699	1	GGGCAUGCAGGCCUGGAUGGGG	5	22
Homo sapiens	hsa-miR-1227-3p	CGUGCCACCCUUUUCCCCAG	20	4.69517e-05	0	0	0	0
Homo sapiens	hsa-miR-1227-5p	GUGGGGCCAGGCGGUGG	17	0.892182	1	GGGGCCAGGCGGUGG	3	15
Homo sapiens	hsa-miR-1228-3p	UCACACCUGCCUCGCCCCCC	20	0.000359811	0	0	0	0
Homo sapiens	hsa-miR-1228-5p	GUGGGCGGGGGCAGGUGUGUG	21	0.986927	1	GGGCGGGGGCAGG	3	13
Homo sapiens	hsa-miR-1229-3p	CUCUCACCACUGCCCUCCCACAG	23	0.00131111	0	0	0	0
Homo sapiens	hsa-miR-1229-5p	GUGGGUAGGGUUUGGGGGAGAGCG	24	0.786463	1	GGGUAGGGUUUGGGGG	3	16
Homo sapiens	hsa-miR-122b-3p	AAACACCAUUGUCACACUCCAC	22	0.0196714	0	0	0	0
Homo sapiens	hsa-miR-122b-5p	UUUAGUGUGAUAAUGGCGUUUGA	23	0.0364009	0	0	0	0
Homo sapiens	hsa-miR-1231	GUGUCUGGGCGGACAGCUGC	20	0.63836	0	0	0	0
Homo sapiens	hsa-miR-1233-3p	UGAGCCCUGUCCUCCCGCAG	20	0.000592778	0	0	0	0
Homo sapiens	hsa-miR-1233-5p	AGUGGGAGGCCAGGGCACGGCA	22	0.878247	1	GGGAGGCCAGGGCACGG	4	17
Homo sapiens	hsa-miR-1234-3p	UCGGCCUGACCACCCACCCCAC	22	0.0026308	0	0	0	0
Homo sapiens	hsa-miR-1236-3p	CCUCUUCCCCUUGUCUCUCCAG	22	0.000587931	0	0	0	0
Homo sapiens	hsa-miR-1236-5p	UGAGUGACAGGGGAAAUGGGGA	22	0.963769	0	0	0	0
Homo sapiens	hsa-miR-1237-3p	UCCUUCUGCUCCGUCCCCCAG	21	0.000161813	0	0	0	0
Homo sapiens	hsa-miR-1237-5p	CGGGGGCGGGGCCGAAGCGCG	21	0.936278	0	0	0	0
Homo sapiens	hsa-miR-1238-3p	CUUCCUCGUCUGUCUGCCCC	20	0.0011962	0	0	0	0
Homo sapiens	hsa-miR-1238-5p	GUGAGUGGGAGCCCCAGUGUGUG	23	0.0521504	0	0	0	0
Homo sapiens	hsa-miR-124-3p	UAAGGCACGCGGUGAAUGCCAA	22	0.518303	0	0	0	0
Homo sapiens	hsa-miR-124-5p	CGUGUUCACAGCGGACCUUGAU	22	0.20144	0	0	0	0
Homo sapiens	hsa-miR-1243	AACUGGAUCAAUUAUAGGAGUG	22	0.124351	0	0	0	0
Homo sapiens	hsa-miR-1244	AAGUAGUUGGUUUGUAUGAGAUGGUU	26	0.0187505	0	0	0	0
Homo sapiens	hsa-miR-1245a	AAGUGAUCUAAAGGCCUACAU	21	0.184575	0	0	0	0
Homo sapiens	hsa-miR-1245b-3p	UCAGAUGAUCUAAAGGCCUAUA	22	0.0076001	0	0	0	0
Homo sapiens	hsa-miR-1245b-5p	UAGGCCUUUAGAUCACUUAAA	21	0.0194042	0	0	0	0
Homo sapiens	hsa-miR-1246	AAUGGAUUUUUGGAGCAGG	19	0.000741262	0	0	0	0
Homo sapiens	hsa-miR-1247-3p	CCCCGGGAACGUCGAGACUGGAGC	24	0.020774	0	0	0	0
Homo sapiens	hsa-miR-1247-5p	ACCCGUCCCGUUCGUCCCCGGA	22	0.000494522	0	0	0	0
Homo sapiens	hsa-miR-1248	ACCUUCUUGUAUAAGCACUGUGCUAAA	27	0.0269604	0	0	0	0
Homo sapiens	hsa-miR-1249-3p	ACGCCCUUCCCCCCCUUCUUCA	22	8.98754e-05	0	0	0	0
Homo sapiens	hsa-miR-1249-5p	AGGAGGGAGGAGAUGGGCCAAGUU	24	0.84306	1	GGAGGGAGGAGAUGGG	2	16
Homo sapiens	hsa-miR-1250-3p	ACAUUUUCCAGCCCAUUCA	19	3.77747e-05	0	0	0	0
Homo sapiens	hsa-miR-1250-5p	ACGGUGCUGGAUGUGGCCUUU	21	0.126055	0	0	0	0
Homo sapiens	hsa-miR-1251-3p	CGCUUUGCUCAGCCAGUGUAG	21	0.00940906	0	0	0	0
Homo sapiens	hsa-miR-1251-5p	ACUCUAGCUGCCAAAGGCGCU	21	0.103877	0	0	0	0
Homo sapiens	hsa-miR-1252-3p	CAAAUGAGCUUAAUUUCCUUUU	22	0.000132396	0	0	0	0
Homo sapiens	hsa-miR-1252-5p	AGAAGGAAAUUGAAUUCAUUUA	22	0.00236108	0	0	0	0
Homo sapiens	hsa-miR-1253	AGAGAAGAAGAUCAGCCUGCA	21	0.00479707	0	0	0	0
Homo sapiens	hsa-miR-1255a	AGGAUGAGCAAAGAAAGUAGAUU	23	0.0537207	0	0	0	0
Homo sapiens	hsa-miR-1255b-2-3p	AACCACUUUCUUUGCUCAUCCA	22	0.000561954	0	0	0	0
Homo sapiens	hsa-miR-1255b-5p	CGGAUGAGCAAAGAAAGUGGUU	22	0.190287	0	0	0	0
Homo sapiens	hsa-miR-1256	AGGCAUUGACUUCUCACUAGCU	22	0.0416045	0	0	0	0
Homo sapiens	hsa-miR-1257	AGUGAAUGAUGGGUUCUGACC	21	0.595354	0	0	0	0
Homo sapiens	hsa-miR-1258	AGUUAGGAUUAGGUCGUGGAA	21	0.874534	0	0	0	0
Homo sapiens	hsa-miR-125a-3p	ACAGGUGAGGUUCUUGGGAGCC	22	0.542645	0	0	0	0
Homo sapiens	hsa-miR-125a-5p	UCCCUGAGACCCUUUAACCUGUGA	24	0.000951253	0	0	0	0
Homo sapiens	hsa-miR-125b-1-3p	ACGGGUUAGGCUCUUGGGAGCU	22	0.929132	0	0	0	0
Homo sapiens	hsa-miR-125b-2-3p	UCACAAGUCAGGCUCUUGGGAC	22	0.439365	0	0	0	0
Homo sapiens	hsa-miR-125b-5p	UCCCUGAGACCCUAACUUGUGA	22	0.00161325	0	0	0	0
Homo sapiens	hsa-miR-126-3p	UCGUACCGUGAGUAAUAAUGCG	22	0.363783	0	0	0	0
Homo sapiens	hsa-miR-126-5p	CAUUAUUACUUUUGGUACGCG	21	0.000456799	0	0	0	0
Homo sapiens	hsa-miR-1260a	AUCCCACCUCUGCCACCA	18	0.00370767	0	0	0	0
Homo sapiens	hsa-miR-1260b	AUCCCACCACUGCCACCAU	19	0.00708016	0	0	0	0
Homo sapiens	hsa-miR-1261	AUGGAUAAGGCUUUGGCUU	19	0.274516	0	0	0	0
Homo sapiens	hsa-miR-1262	AUGGGUGAAUUUGUAGAAGGAU	22	0.104729	0	0	0	0
Homo sapiens	hsa-miR-1263	AUGGUACCCUGGCAUACUGAGU	22	0.0940123	0	0	0	0
Homo sapiens	hsa-miR-1264	CAAGUCUUAUUUGAGCACCUGUU	23	0.0045764	0	0	0	0
Homo sapiens	hsa-miR-1265	CAGGAUGUGGUCAAGUGUUGUU	22	0.78778	0	0	0	0
Homo sapiens	hsa-miR-1266-3p	CCCUGUUCUAUGCCCUGAGGGA	22	0.0026699	0	0	0	0
Homo sapiens	hsa-miR-1266-5p	CCUCAGGGCUGUAGAACAGGGCU	23	0.549403	0	0	0	0
Homo sapiens	hsa-miR-1267	CCUGUUGAAGUGUAAUCCCCA	21	0.0109941	0	0	0	0
Homo sapiens	hsa-miR-1268a	CGGGCGUGGUGGUGGGGG	18	0.991827	1	GGGCGUGGUGGUGGGGG	2	17
Homo sapiens	hsa-miR-1268b	CGGGCGUGGUGGUGGGGGUG	20	0.989999	1	GGGCGUGGUGGUGGGGG	2	17
Homo sapiens	hsa-miR-1269a	CUGGACUGAGCCGUGCUACUGG	22	0.101359	0	0	0	0
Homo sapiens	hsa-miR-1269b	CUGGACUGAGCCAUGCUACUGG	22	0.097919	0	0	0	0
Homo sapiens	hsa-miR-127-3p	UCGGAUCCGUCUGAGCUUGGCU	22	0.146424	0	0	0	0
Homo sapiens	hsa-miR-127-5p	CUGAAGCUCAGAGGGCUCUGAU	22	0.146046	0	0	0	0
Homo sapiens	hsa-miR-1270	CUGGAGAUAUGGAAGAGCUGUGU	23	0.0248997	0	0	0	0
Homo sapiens	hsa-miR-1271-3p	AGUGCCUGCUAUGUGCCAGGCA	22	0.0176948	0	0	0	0
Homo sapiens	hsa-miR-1271-5p	CUUGGCACCUAGCAAGCACUCA	22	0.0751677	0	0	0	0
Homo sapiens	hsa-miR-1272	GAUGAUGAUGGCAGCAAAUUCUGAAA	26	0.127956	0	0	0	0
Homo sapiens	hsa-miR-1273c	GGCGACAAAACGAGACCCUGUC	22	0.00942099	0	0	0	0
Homo sapiens	hsa-miR-1273h-3p	CUGCAGACUCGACCUCCCAGGC	22	0.00391782	0	0	0	0
Homo sapiens	hsa-miR-1273h-5p	CUGGGAGGUCAAGGCUGCAGU	21	0.717891	0	0	0	0
Homo sapiens	hsa-miR-1275	GUGGGGGAGAGGCUGUC	17	0.916692	0	0	0	0
Homo sapiens	hsa-miR-1276	UAAAGAGCCCUGUGGAGACA	20	0.00665528	0	0	0	0
Homo sapiens	hsa-miR-1277-3p	UACGUAGAUAUAUAUGUAUUUU	22	3.7253e-05	0	0	0	0
Homo sapiens	hsa-miR-1277-5p	AAAUAUAUAUAUAUAUGUACGUAU	24	5.68266e-05	0	0	0	0
Homo sapiens	hsa-miR-1278	UAGUACUGUGCAUAUCAUCUAU	22	0.00549217	0	0	0	0
Homo sapiens	hsa-miR-1279	UCAUAUUGCUUCUUUCU	17	0.000223612	0	0	0	0
Homo sapiens	hsa-miR-128-1-5p	CGGGGCCGUAGCACUGUCUGAGA	23	0.263545	0	0	0	0
Homo sapiens	hsa-miR-128-2-5p	GGGGGCCGAUACACUGUACGAGA	23	0.421216	0	0	0	0
Homo sapiens	hsa-miR-128-3p	UCACAGUGAACCGGUCUCUUU	21	0.018123	0	0	0	0
Homo sapiens	hsa-miR-1281	UCGCCUCCUCCUCUCCC	17	0.000172819	0	0	0	0
Homo sapiens	hsa-miR-1282	UCGUUUGCCUUUUUCUGCUU	20	7.66822e-05	0	0	0	0
Homo sapiens	hsa-miR-1283	UCUACAAAGGAAAGCGCUUUCU	22	0.0113286	0	0	0	0
Homo sapiens	hsa-miR-1284	UCUAUACAGACCCUGGCUUUUC	22	0.000101728	0	0	0	0
Homo sapiens	hsa-miR-1285-3p	UCUGGGCAACAAAGUGAGACCU	22	0.24606	0	0	0	0
Homo sapiens	hsa-miR-1285-5p	GAUCUCACUUUGUUGCCCAGG	21	0.00642613	0	0	0	0
Homo sapiens	hsa-miR-1286	UGCAGGACCAAGAUGAGCCCU	21	0.0330229	0	0	0	0
Homo sapiens	hsa-miR-1287-3p	CUCUAGCCACAGAUGCAGUGAU	22	0.0566322	0	0	0	0
Homo sapiens	hsa-miR-1287-5p	UGCUGGAUCAGUGGUUCGAGUC	22	0.244052	0	0	0	0
Homo sapiens	hsa-miR-1288-3p	UGGACUGCCCUGAUCUGGAGA	21	0.0501319	0	0	0	0
Homo sapiens	hsa-miR-1288-5p	GCAGAUCAGGACUGUAACUCACC	23	0.166945	0	0	0	0
Homo sapiens	hsa-miR-1289	UGGAGUCCAGGAAUCUGCAUUUU	23	0.0030106	0	0	0	0
Homo sapiens	hsa-miR-129-1-3p	AAGCCCUUACCCCAAAAAGUAU	22	0.000383294	0	0	0	0
Homo sapiens	hsa-miR-129-2-3p	AAGCCCUUACCCCAAAAAGCAU	22	0.00157859	0	0	0	0
Homo sapiens	hsa-miR-129-5p	CUUUUUGCGGUCUGGGCUUGC	21	0.0013733	0	0	0	0
Homo sapiens	hsa-miR-1290	UGGAUUUUUGGAUCAGGGA	19	0.00317628	0	0	0	0
Homo sapiens	hsa-miR-1291	UGGCCCUGACUGAAGACCAGCAGU	24	0.0211545	0	0	0	0
Homo sapiens	hsa-miR-1292-3p	UCGCGCCCCGGCUCCCGUUC	20	0.000554923	0	0	0	0
Homo sapiens	hsa-miR-1292-5p	UGGGAACGGGUUCCGGCAGACGCUG	25	0.414549	0	0	0	0
Homo sapiens	hsa-miR-1293	UGGGUGGUCUGGAGAUUUGUGC	22	0.0730157	0	0	0	0
Homo sapiens	hsa-miR-1294	UGUGAGGUUGGCAUUGUUGUCU	22	0.570956	0	0	0	0
Homo sapiens	hsa-miR-1295a	UUAGGCCGCAGAUCUGGGUGA	21	0.543024	0	0	0	0
Homo sapiens	hsa-miR-1295b-3p	AAUAGGCCACGGAUCUGGGCAA	22	0.880923	0	0	0	0
Homo sapiens	hsa-miR-1295b-5p	CACCCAGAUCUGCGGCCUAAU	21	0.018867	0	0	0	0
Homo sapiens	hsa-miR-1296-3p	GAGUGGGGCUUCGACCCUAACC	22	0.104706	0	0	0	0
Homo sapiens	hsa-miR-1296-5p	UUAGGGCCCUGGCUCCAUCUCC	22	0.0192549	0	0	0	0
Homo sapiens	hsa-miR-1297	UUCAAGUAAUUCAGGUG	17	0.032802	0	0	0	0
Homo sapiens	hsa-miR-1298-3p	CAUCUGGGCAACUGACUGAAC	21	0.615254	0	0	0	0
Homo sapiens	hsa-miR-1298-5p	UUCAUUCGGCUGUCCAGAUGUA	22	0.00718045	0	0	0	0
Homo sapiens	hsa-miR-1299	UUCUGGAAUUCUGUGUGAGGGA	22	0.347808	0	0	0	0
Homo sapiens	hsa-miR-1301-3p	UUGCAGCUGCCUGGGAGUGACUUC	24	0.220754	0	0	0	0
Homo sapiens	hsa-miR-1301-5p	CGCUCUAGGCACCGCAGCA	19	0.176145	0	0	0	0
Homo sapiens	hsa-miR-1302	UUGGGACAUACUUAUGCUAAA	21	0.0974167	0	0	0	0
Homo sapiens	hsa-miR-1303	UUUAGAGACGGGGUCUUGCUCU	22	0.0549671	0	0	0	0
Homo sapiens	hsa-miR-1304-3p	UCUCACUGUAGCCUCGAACCCC	22	0.00301644	0	0	0	0
Homo sapiens	hsa-miR-1304-5p	UUUGAGGCUACAGUGAGAUGUG	22	0.0159475	0	0	0	0
Homo sapiens	hsa-miR-1305	UUUUCAACUCUAAUGGGAGAGA	22	0.000610253	0	0	0	0
Homo sapiens	hsa-miR-1306-3p	ACGUUGGCUCUGGUGGUG	18	0.76906	0	0	0	0
Homo sapiens	hsa-miR-1306-5p	CCACCUCCCCUGCAAACGUCCA	22	0.00151682	0	0	0	0
Homo sapiens	hsa-miR-1307-3p	ACUCGGCGUGGCGUCGGUCGUG	22	0.396407	0	0	0	0
Homo sapiens	hsa-miR-1307-5p	UCGACCGGACCUCGACCGGCU	21	0.138604	0	0	0	0
Homo sapiens	hsa-miR-130a-3p	CAGUGCAAUGUUAAAAGGGCAU	22	0.757032	0	0	0	0
Homo sapiens	hsa-miR-130a-5p	GCUCUUUUCACAUUGUGCUACU	22	0.000861987	0	0	0	0
Homo sapiens	hsa-miR-130b-3p	CAGUGCAAUGAUGAAAGGGCAU	22	0.683444	0	0	0	0
Homo sapiens	hsa-miR-130b-5p	ACUCUUUCCCUGUUGCACUAC	21	0.000878145	0	0	0	0
Homo sapiens	hsa-miR-132-3p	UAACAGUCUACAGCCAUGGUCG	22	0.153034	0	0	0	0
Homo sapiens	hsa-miR-132-5p	ACCGUGGCUUUCGAUUGUUACU	22	0.0199279	0	0	0	0
Homo sapiens	hsa-miR-1321	CAGGGAGGUGAAUGUGAU	18	0.899376	0	0	0	0
Homo sapiens	hsa-miR-1322	GAUGAUGCUGCUGAUGCUG	19	0.572922	0	0	0	0
Homo sapiens	hsa-miR-1323	UCAAAACUGAGGGGCAUUUUCU	22	0.00341538	0	0	0	0
Homo sapiens	hsa-miR-1324	CCAGACAGAAUUCUAUGCACUUUC	24	0.000275232	0	0	0	0
Homo sapiens	hsa-miR-133a-3p	UUUGGUCCCCUUCAACCAGCUG	22	0.000528848	0	0	0	0
Homo sapiens	hsa-miR-133a-5p	AGCUGGUAAAAUGGAACCAAAU	22	0.216695	0	0	0	0
Homo sapiens	hsa-miR-133b	UUUGGUCCCCUUCAACCAGCUA	22	0.000348186	0	0	0	0
Homo sapiens	hsa-miR-134-3p	CCUGUGGGCCACCUAGUCACCAA	23	0.176401	0	0	0	0
Homo sapiens	hsa-miR-134-5p	UGUGACUGGUUGACCAGAGGGG	22	0.613352	0	0	0	0
Homo sapiens	hsa-miR-1343-3p	CUCCUGGGGCCCGCACUCUCGC	22	0.0340494	0	0	0	0
Homo sapiens	hsa-miR-1343-5p	UGGGGAGCGGCCCCCGGGUGGG	22	0.138658	1	GGGGAGCGGCCCCCGGGUGGG	2	21
Homo sapiens	hsa-miR-135a-2-3p	AUGUAGGGAUGGAAGCCAUGAA	22	0.743193	0	0	0	0
Homo sapiens	hsa-miR-135a-3p	UAUAGGGAUUGGAGCCGUGGCG	22	0.161763	0	0	0	0
Homo sapiens	hsa-miR-135a-5p	UAUGGCUUUUUAUUCCUAUGUGA	23	1.32153e-05	0	0	0	0
Homo sapiens	hsa-miR-135b-3p	AUGUAGGGCUAAAAGCCAUGGG	22	0.473152	0	0	0	0
Homo sapiens	hsa-miR-135b-5p	UAUGGCUUUUCAUUCCUAUGUGA	23	4.01919e-05	0	0	0	0
Homo sapiens	hsa-miR-136-3p	CAUCAUCGUCUCAAAUGAGUCU	22	0.11622	0	0	0	0
Homo sapiens	hsa-miR-136-5p	ACUCCAUUUGUUUUGAUGAUGGA	23	0.000698212	0	0	0	0
Homo sapiens	hsa-miR-137-3p	UUAUUGCUUAAGAAUACGCGUAG	23	0.0342782	0	0	0	0
Homo sapiens	hsa-miR-137-5p	ACGGGUAUUCUUGGGUGGAUAAU	23	0.349147	0	0	0	0
Homo sapiens	hsa-miR-138-1-3p	GCUACUUCACAACACCAGGGCC	22	0.125162	0	0	0	0
Homo sapiens	hsa-miR-138-2-3p	GCUAUUUCACGACACCAGGGUU	22	0.0027935	0	0	0	0
Homo sapiens	hsa-miR-138-5p	AGCUGGUGUUGUGAAUCAGGCCG	23	0.379377	0	0	0	0
Homo sapiens	hsa-miR-139-3p	UGGAGACGCGGCCCUGUUGGAGU	23	0.0739957	0	0	0	0
Homo sapiens	hsa-miR-139-5p	UCUACAGUGCACGUGUCUCCAGU	23	0.0606133	0	0	0	0
Homo sapiens	hsa-miR-140-3p	UACCACAGGGUAGAACCACGG	21	0.39897	0	0	0	0
Homo sapiens	hsa-miR-140-5p	CAGUGGUUUUACCCUAUGGUAG	22	0.000469623	0	0	0	0
Homo sapiens	hsa-miR-141-3p	UAACACUGUCUGGUAAAGAUGG	22	0.304513	0	0	0	0
Homo sapiens	hsa-miR-141-5p	CAUCUUCCAGUACAGUGUUGGA	22	0.110312	0	0	0	0
Homo sapiens	hsa-miR-142-3p	UGUAGUGUUUCCUACUUUAUGGA	23	0.00048283	0	0	0	0
Homo sapiens	hsa-miR-142-5p	CAUAAAGUAGAAAGCACUACU	21	0.0665436	0	0	0	0
Homo sapiens	hsa-miR-143-3p	UGAGAUGAAGCACUGUAGCUC	21	0.0827994	0	0	0	0
Homo sapiens	hsa-miR-143-5p	GGUGCAGUGCUGCAUCUCUGGU	22	0.457251	0	0	0	0
Homo sapiens	hsa-miR-144-3p	UACAGUAUAGAUGAUGUACU	20	0.0245556	0	0	0	0
Homo sapiens	hsa-miR-144-5p	GGAUAUCAUCAUAUACUGUAAG	22	0.0202571	0	0	0	0
Homo sapiens	hsa-miR-145-3p	GGAUUCCUGGAAAUACUGUUCU	22	0.0554136	0	0	0	0
Homo sapiens	hsa-miR-145-5p	GUCCAGUUUUCCCAGGAAUCCCU	23	0.000150984	0	0	0	0
Homo sapiens	hsa-miR-1468-3p	AGCAAAAUAAGCAAAUGGAAAA	22	0.12758	0	0	0	0
Homo sapiens	hsa-miR-1468-5p	CUCCGUUUGCCUGUUUCGCUG	21	0.00077202	0	0	0	0
Homo sapiens	hsa-miR-1469	CUCGGCGCGGGGCGCGGGCUCC	22	0.544071	0	0	0	0
Homo sapiens	hsa-miR-146a-3p	CCUCUGAAAUUCAGUUCUUCAG	22	0.00668311	0	0	0	0
Homo sapiens	hsa-miR-146a-5p	UGAGAACUGAAUUCCAUGGGUU	22	0.036668	0	0	0	0
Homo sapiens	hsa-miR-146b-3p	GCCCUGUGGACUCAGUUCUGGU	22	0.0412908	0	0	0	0
Homo sapiens	hsa-miR-146b-5p	UGAGAACUGAAUUCCAUAGGCUG	23	0.0274375	0	0	0	0
Homo sapiens	hsa-miR-1470	GCCCUCCGCCCGUGCACCCCG	21	0.000326765	0	0	0	0
Homo sapiens	hsa-miR-1471	GCCCGCGUGUGGAGCCAGGUGU	22	0.0821412	0	0	0	0
Homo sapiens	hsa-miR-147a	GUGUGUGGAAAUGCUUCUGC	20	0.273712	0	0	0	0
Homo sapiens	hsa-miR-147b-3p	GUGUGCGGAAAUGCUUCUGCU	21	0.243313	0	0	0	0
Homo sapiens	hsa-miR-147b-5p	UGGAAACAUUUCUGCACAAACU	22	0.0134839	0	0	0	0
Homo sapiens	hsa-miR-148a-3p	UCAGUGCACUACAGAACUUUGU	22	0.00543863	0	0	0	0
Homo sapiens	hsa-miR-148a-5p	AAAGUUCUGAGACACUCCGACU	22	0.00870838	0	0	0	0
Homo sapiens	hsa-miR-148b-3p	UCAGUGCAUCACAGAACUUUGU	22	0.00957131	0	0	0	0
Homo sapiens	hsa-miR-148b-5p	AAGUUCUGUUAUACACUCAGGC	22	0.0482848	0	0	0	0
Homo sapiens	hsa-miR-149-3p	AGGGAGGGACGGGGGCUGUGC	21	0.996631	1	GGGAGGGACGGGGG	2	14
Homo sapiens	hsa-miR-149-5p	UCUGGCUCCGUGUCUUCACUCCC	23	0.00268629	0	0	0	0
Homo sapiens	hsa-miR-150-3p	CUGGUACAGGCCUGGGGGACAG	22	0.904051	1	GGUACAGGCCUGGGGG	3	16
Homo sapiens	hsa-miR-150-5p	UCUCCCAACCCUUGUACCAGUG	22	0.00359364	0	0	0	0
Homo sapiens	hsa-miR-151a-3p	CUAGACUGAAGCUCCUUGAGG	21	0.0126575	0	0	0	0
Homo sapiens	hsa-miR-151a-5p	UCGAGGAGCUCACAGUCUAGU	21	0.0598401	0	0	0	0
Homo sapiens	hsa-miR-151b	UCGAGGAGCUCACAGUCU	18	0.0825403	0	0	0	0
Homo sapiens	hsa-miR-152-3p	UCAGUGCAUGACAGAACUUGG	21	0.0929399	0	0	0	0
Homo sapiens	hsa-miR-152-5p	AGGUUCUGUGAUACACUCCGACU	23	0.101659	0	0	0	0
Homo sapiens	hsa-miR-153-3p	UUGCAUAGUCACAAAAGUGAUC	22	0.335773	0	0	0	0
Homo sapiens	hsa-miR-153-5p	UCAUUUUUGUGAUGUUGCAGCU	22	0.00081585	0	0	0	0
Homo sapiens	hsa-miR-1537-3p	AAAACCGUCUAGUUACAGUUGU	22	0.215815	0	0	0	0
Homo sapiens	hsa-miR-1537-5p	AGCUGUAAUUAGUCAGUUUUCU	22	0.00253665	0	0	0	0
Homo sapiens	hsa-miR-1538	CGGCCCGGGCUGCUGCUGUUCCU	23	0.0365339	0	0	0	0
Homo sapiens	hsa-miR-1539	UCCUGCGCGUCCCAGAUGCCC	21	0.000684359	0	0	0	0
Homo sapiens	hsa-miR-154-3p	AAUCAUACACGGUUGACCUAUU	22	0.0264315	0	0	0	0
Homo sapiens	hsa-miR-154-5p	UAGGUUAUCCGUGUUGCCUUCG	22	0.021375	0	0	0	0
Homo sapiens	hsa-miR-155-3p	CUCCUACAUAUUAGCAUUAACA	22	0.00443775	0	0	0	0
Homo sapiens	hsa-miR-155-5p	UUAAUGCUAAUCGUGAUAGGGGUU	24	0.948051	0	0	0	0
Homo sapiens	hsa-miR-1587	UUGGGCUGGGCUGGGUUGGG	20	0.989319	1	GGGCUGGGCUGGGUUGGG	3	18
Homo sapiens	hsa-miR-15a-3p	CAGGCCAUAUUGUGCUGCCUCA	22	0.0118114	0	0	0	0
Homo sapiens	hsa-miR-15a-5p	UAGCAGCACAUAAUGGUUUGUG	22	0.137622	0	0	0	0
Homo sapiens	hsa-miR-15b-3p	CGAAUCAUUAUUUGCUGCUCUA	22	0.000559944	0	0	0	0
Homo sapiens	hsa-miR-15b-5p	UAGCAGCACAUCAUGGUUUACA	22	0.0584541	0	0	0	0
Homo sapiens	hsa-miR-16-1-3p	CCAGUAUUAACUGUGCUGCUGA	22	0.0319309	0	0	0	0
Homo sapiens	hsa-miR-16-2-3p	CCAAUAUUACUGUGCUGCUUUA	22	0.00505146	0	0	0	0
Homo sapiens	hsa-miR-16-5p	UAGCAGCACGUAAAUAUUGGCG	22	0.030111	0	0	0	0
Homo sapiens	hsa-miR-17-3p	ACUGCAGUGAAGGCACUUGUAG	22	0.438129	0	0	0	0
Homo sapiens	hsa-miR-17-5p	CAAAGUGCUUACAGUGCAGGUAG	23	0.451385	0	0	0	0
Homo sapiens	hsa-miR-181a-2-3p	ACCACUGACCGUUGACUGUACC	22	0.261708	0	0	0	0
Homo sapiens	hsa-miR-181a-3p	ACCAUCGACCGUUGAUUGUACC	22	0.19397	0	0	0	0
Homo sapiens	hsa-miR-181a-5p	AACAUUCAACGCUGUCGGUGAGU	23	0.144523	0	0	0	0
Homo sapiens	hsa-miR-181b-2-3p	CUCACUGAUCAAUGAAUGCA	20	0.13987	0	0	0	0
Homo sapiens	hsa-miR-181b-3p	CUCACUGAACAAUGAAUGCAA	21	0.172428	0	0	0	0
Homo sapiens	hsa-miR-181b-5p	AACAUUCAUUGCUGUCGGUGGGU	23	0.224672	0	0	0	0
Homo sapiens	hsa-miR-181c-3p	AACCAUCGACCGUUGAGUGGAC	22	0.345698	0	0	0	0
Homo sapiens	hsa-miR-181c-5p	AACAUUCAACCUGUCGGUGAGU	22	0.0912991	0	0	0	0
Homo sapiens	hsa-miR-181d-3p	CCACCGGGGGAUGAAUGUCAC	21	0.882122	0	0	0	0
Homo sapiens	hsa-miR-181d-5p	AACAUUCAUUGUUGUCGGUGGGU	23	0.308502	0	0	0	0
Homo sapiens	hsa-miR-182-3p	UGGUUCUAGACUUGCCAACUA	21	0.0206035	0	0	0	0
Homo sapiens	hsa-miR-182-5p	UUUGGCAAUGGUAGAACUCACACU	24	0.0228519	0	0	0	0
Homo sapiens	hsa-miR-1825	UCCAGUGCCCUCCUCUCC	18	0.000289766	0	0	0	0
Homo sapiens	hsa-miR-1827	UGAGGCAGUAGAUUGAAU	18	0.0992564	0	0	0	0
Homo sapiens	hsa-miR-183-3p	GUGAAUUACCGAAGGGCCAUAA	22	0.423404	0	0	0	0
Homo sapiens	hsa-miR-183-5p	UAUGGCACUGGUAGAAUUCACU	22	0.00600469	0	0	0	0
Homo sapiens	hsa-miR-184	UGGACGGAGAACUGAUAAGGGU	22	0.821721	0	0	0	0
Homo sapiens	hsa-miR-1843	UAUGGAGGUCUCUGUCUGGC	20	0.0643102	0	0	0	0
Homo sapiens	hsa-miR-185-3p	AGGGGCUGGCUUUCCUCUGGUC	22	0.0589257	0	0	0	0
Homo sapiens	hsa-miR-185-5p	UGGAGAGAAAGGCAGUUCCUGA	22	0.0132545	0	0	0	0
Homo sapiens	hsa-miR-186-3p	GCCCAAAGGUGAAUUUUUUGGG	22	0.000114223	0	0	0	0
Homo sapiens	hsa-miR-186-5p	CAAAGAAUUCUCCUUUUGGGCU	22	0.000510326	0	0	0	0
Homo sapiens	hsa-miR-187-3p	UCGUGUCUUGUGUUGCAGCCGG	22	0.257901	0	0	0	0
Homo sapiens	hsa-miR-187-5p	GGCUACAACACAGGACCCGGGC	22	0.237873	0	0	0	0
Homo sapiens	hsa-miR-188-3p	CUCCCACAUGCAGGGUUUGCA	21	0.00961026	0	0	0	0
Homo sapiens	hsa-miR-188-5p	CAUCCCUUGCAUGGUGGAGGG	21	0.178832	0	0	0	0
Homo sapiens	hsa-miR-18a-3p	ACUGCCCUAAGUGCUCCUUCUGG	23	0.00600832	0	0	0	0
Homo sapiens	hsa-miR-18a-5p	UAAGGUGCAUCUAGUGCAGAUAG	23	0.496431	0	0	0	0
Homo sapiens	hsa-miR-18b-3p	UGCCCUAAAUGCCCCUUCUGGC	22	0.000734569	0	0	0	0
Homo sapiens	hsa-miR-18b-5p	UAAGGUGCAUCUAGUGCAGUUAG	23	0.69419	0	0	0	0
Homo sapiens	hsa-miR-1908-3p	CCGGCCGCCGGCUCCGCCCCG	21	0.00127018	0	0	0	0
Homo sapiens	hsa-miR-1908-5p	CGGCGGGGACGGCGAUUGGUC	21	0.799383	1	GGCGGGGACGGCGAUUGG	2	18
Homo sapiens	hsa-miR-1909-3p	CGCAGGGGCCGGGUGCUCACCG	22	0.788044	0	0	0	0
Homo sapiens	hsa-miR-1909-5p	UGAGUGCCGGUGCCUGCCCUG	21	0.0188394	0	0	0	0
Homo sapiens	hsa-miR-190a-3p	CUAUAUAUCAAACAUAUUCCU	21	4.81061e-05	0	0	0	0
Homo sapiens	hsa-miR-190a-5p	UGAUAUGUUUGAUAUAUUAGGU	22	0.00116282	0	0	0	0
Homo sapiens	hsa-miR-190b-3p	ACUAAAUGUCAAACAUAUUCU	21	0.00442501	0	0	0	0
Homo sapiens	hsa-miR-190b-5p	UGAUAUGUUUGAUAUUGGGUUG	22	0.00702498	0	0	0	0
Homo sapiens	hsa-miR-191-3p	GCUGCGCUUGGAUUUCGUCCCC	22	0.000862173	0	0	0	0
Homo sapiens	hsa-miR-191-5p	CAACGGAAUCCCAAAAGCAGCUG	23	0.0252023	0	0	0	0
Homo sapiens	hsa-miR-1910-3p	GAGGCAGAAGCAGGAUGACA	20	0.331858	0	0	0	0
Homo sapiens	hsa-miR-1910-5p	CCAGUCCUGUGCCUGCCGCCU	21	0.0189841	0	0	0	0
Homo sapiens	hsa-miR-1911-3p	CACCAGGCAUUGUGGUCUCC	20	0.102934	0	0	0	0
Homo sapiens	hsa-miR-1911-5p	UGAGUACCGCCAUGUCUGUUGGG	23	0.35978	0	0	0	0
Homo sapiens	hsa-miR-1912-3p	UACCCAGAGCAUGCAGUGUGAA	22	0.0246683	0	0	0	0
Homo sapiens	hsa-miR-1912-5p	CUCAUUGCAUGGGCUGUGUAUA	22	0.0554809	0	0	0	0
Homo sapiens	hsa-miR-1913	UCUGCCCCCUCCGCUGCUGCCA	22	0.000627766	0	0	0	0
Homo sapiens	hsa-miR-1914-3p	GGAGGGGUCCCGCACUGGGAGG	22	0.540626	1	GGAGGGGUCCCGCACUGGGAGG	1	22
Homo sapiens	hsa-miR-1914-5p	CCCUGUGCCCGGCCCACUUCUG	22	0.00146218	0	0	0	0
Homo sapiens	hsa-miR-1915-3p	CCCCAGGGCGACGCGGCGGG	20	0.0887405	0	0	0	0
Homo sapiens	hsa-miR-1915-5p	ACCUUGCCUUGCUGCCCGGGCC	22	0.0396825	0	0	0	0
Homo sapiens	hsa-miR-192-3p	CUGCCAAUUCCAUAGGUCACAG	22	0.0278699	0	0	0	0
Homo sapiens	hsa-miR-192-5p	CUGACCUAUGAAUUGACAGCC	21	0.00500241	0	0	0	0
Homo sapiens	hsa-miR-193a-3p	AACUGGCCUACAAAGUCCCAGU	22	0.00643089	0	0	0	0
Homo sapiens	hsa-miR-193a-5p	UGGGUCUUUGCGGGCGAGAUGA	22	0.0607259	0	0	0	0
Homo sapiens	hsa-miR-193b-3p	AACUGGCCCUCAAAGUCCCGCU	22	0.0022885	0	0	0	0
Homo sapiens	hsa-miR-193b-5p	CGGGGUUUUGAGGGCGAGAUGA	22	0.0287354	0	0	0	0
Homo sapiens	hsa-miR-194-3p	CCAGUGGGGCUGCUGUUAUCUG	22	0.348453	0	0	0	0
Homo sapiens	hsa-miR-194-5p	UGUAACAGCAACUCCAUGUGGA	22	0.147277	0	0	0	0
Homo sapiens	hsa-miR-195-3p	CCAAUAUUGGCUGUGCUGCUCC	22	0.0109149	0	0	0	0
Homo sapiens	hsa-miR-195-5p	UAGCAGCACAGAAAUAUUGGC	21	0.00729038	0	0	0	0
Homo sapiens	hsa-miR-196a-1-3p	CAACAACAUUAAACCACCCGA	21	0.0345552	0	0	0	0
Homo sapiens	hsa-miR-196a-3p	CGGCAACAAGAAACUGCCUGAG	22	0.0689004	0	0	0	0
Homo sapiens	hsa-miR-196a-5p	UAGGUAGUUUCAUGUUGUUGGG	22	0.235724	0	0	0	0
Homo sapiens	hsa-miR-196b-3p	UCGACAGCACGACACUGCCUUC	22	0.0415126	0	0	0	0
Homo sapiens	hsa-miR-196b-5p	UAGGUAGUUUCCUGUUGUUGGG	22	0.0914103	0	0	0	0
Homo sapiens	hsa-miR-197-3p	UUCACCACCUUCUCCACCCAGC	22	0.00212863	0	0	0	0
Homo sapiens	hsa-miR-197-5p	CGGGUAGAGAGGGCAGUGGGAGG	23	0.665549	1	GGGUAGAGAGGGCAGUGGGAGG	2	22
Homo sapiens	hsa-miR-1972	UCAGGCCAGGCACAGUGGCUCA	22	0.182744	0	0	0	0
Homo sapiens	hsa-miR-1973	ACCGUGCAAAGGUAGCAUA	19	0.488367	0	0	0	0
Homo sapiens	hsa-miR-1976	CCUCCUGCCCUCCUUGCUGU	20	0.00166552	0	0	0	0
Homo sapiens	hsa-miR-198	GGUCCAGAGGGGAGAUAGGUUC	22	0.275868	0	0	0	0
Homo sapiens	hsa-miR-199a-3p	ACAGUAGUCUGCACAUUGGUUA	22	0.404312	0	0	0	0
Homo sapiens	hsa-miR-199a-5p	CCCAGUGUUCAGACUACCUGUUC	23	0.00711137	0	0	0	0
Homo sapiens	hsa-miR-199b-3p	ACAGUAGUCUGCACAUUGGUUA	22	0.404312	0	0	0	0
Homo sapiens	hsa-miR-199b-5p	CCCAGUGUUUAGACUAUCUGUUC	23	0.00110114	0	0	0	0
Homo sapiens	hsa-miR-19a-3p	UGUGCAAAUCUAUGCAAAACUGA	23	0.0131382	0	0	0	0
Homo sapiens	hsa-miR-19a-5p	AGUUUUGCAUAGUUGCACUACA	22	0.00868808	0	0	0	0
Homo sapiens	hsa-miR-19b-1-5p	AGUUUUGCAGGUUUGCAUCCAGC	23	0.000986819	0	0	0	0
Homo sapiens	hsa-miR-19b-2-5p	AGUUUUGCAGGUUUGCAUUUCA	22	0.000189474	0	0	0	0
Homo sapiens	hsa-miR-19b-3p	UGUGCAAAUCCAUGCAAAACUGA	23	0.0538258	0	0	0	0
Homo sapiens	hsa-miR-200a-3p	UAACACUGUCUGGUAACGAUGU	22	0.543065	0	0	0	0
Homo sapiens	hsa-miR-200a-5p	CAUCUUACCGGACAGUGCUGGA	22	0.6072	0	0	0	0
Homo sapiens	hsa-miR-200b-3p	UAAUACUGCCUGGUAAUGAUGA	22	0.448837	0	0	0	0
Homo sapiens	hsa-miR-200b-5p	CAUCUUACUGGGCAGCAUUGGA	22	0.546525	0	0	0	0
Homo sapiens	hsa-miR-200c-3p	UAAUACUGCCGGGUAAUGAUGGA	23	0.752446	0	0	0	0
Homo sapiens	hsa-miR-200c-5p	CGUCUUACCCAGCAGUGUUUGG	22	0.0104031	0	0	0	0
Homo sapiens	hsa-miR-202-3p	AGAGGUAUAGGGCAUGGGAA	20	0.340335	0	0	0	0
Homo sapiens	hsa-miR-202-5p	UUCCUAUGCAUAUACUUCUUUG	22	0.000165212	0	0	0	0
Homo sapiens	hsa-miR-203a-3p	GUGAAAUGUUUAGGACCACUAG	22	0.0733029	0	0	0	0
Homo sapiens	hsa-miR-203a-5p	AGUGGUUCUUAACAGUUCAACAGUU	25	0.317432	0	0	0	0
Homo sapiens	hsa-miR-203b-3p	UUGAACUGUUAAGAACCACUGGA	23	0.356815	0	0	0	0
Homo sapiens	hsa-miR-203b-5p	UAGUGGUCCUAAACAUUUCACA	22	0.00276046	0	0	0	0
Homo sapiens	hsa-miR-204-3p	GCUGGGAAGGCAAAGGGACGU	21	0.963586	0	0	0	0
Homo sapiens	hsa-miR-204-5p	UUCCCUUUGUCAUCCUAUGCCU	22	0.00012585	0	0	0	0
Homo sapiens	hsa-miR-205-3p	GAUUUCAGUGGAGUGAAGUUC	21	0.012064	0	0	0	0
Homo sapiens	hsa-miR-205-5p	UCCUUCAUUCCACCGGAGUCUG	22	0.00305043	0	0	0	0
Homo sapiens	hsa-miR-2052	UGUUUUGAUAACAGUAAUGU	20	0.0163672	0	0	0	0
Homo sapiens	hsa-miR-2053	GUGUUAAUUAAACCUCUAUUUAC	23	0.00267022	0	0	0	0
Homo sapiens	hsa-miR-2054	CUGUAAUAUAAAUUUAAUUUAUU	23	0.000199541	0	0	0	0
Homo sapiens	hsa-miR-206	UGGAAUGUAAGGAAGUGUGUGG	22	0.811507	0	0	0	0
Homo sapiens	hsa-miR-208a-3p	AUAAGACGAGCAAAAAGCUUGU	22	0.0478515	0	0	0	0
Homo sapiens	hsa-miR-208a-5p	GAGCUUUUGGCCCGGGUUAUAC	22	0.000709436	0	0	0	0
Homo sapiens	hsa-miR-208b-3p	AUAAGACGAACAAAAGGUUUGU	22	0.0424562	0	0	0	0
Homo sapiens	hsa-miR-208b-5p	AAGCUUUUUGCUCGAAUUAUGU	22	0.000106114	0	0	0	0
Homo sapiens	hsa-miR-20a-3p	ACUGCAUUAUGAGCACUUAAAG	22	0.0215852	0	0	0	0
Homo sapiens	hsa-miR-20a-5p	UAAAGUGCUUAUAGUGCAGGUAG	23	0.158007	0	0	0	0
Homo sapiens	hsa-miR-20b-3p	ACUGUAGUAUGGGCACUUCCAG	22	0.0130393	0	0	0	0
Homo sapiens	hsa-miR-20b-5p	CAAAGUGCUCAUAGUGCAGGUAG	23	0.434702	0	0	0	0
Homo sapiens	hsa-miR-21-3p	CAACACCAGUCGAUGGGCUGU	21	0.521942	0	0	0	0
Homo sapiens	hsa-miR-21-5p	UAGCUUAUCAGACUGAUGUUGA	22	0.0219893	0	0	0	0
Homo sapiens	hsa-miR-210-3p	CUGUGCGUGUGACAGCGGCUGA	22	0.320451	0	0	0	0
Homo sapiens	hsa-miR-210-5p	AGCCCCUGCCCACCGCACACUG	22	0.00223501	0	0	0	0
Homo sapiens	hsa-miR-211-3p	GCAGGGACAGCAAAGGGGUGC	21	0.947152	0	0	0	0
Homo sapiens	hsa-miR-211-5p	UUCCCUUUGUCAUCCUUCGCCU	22	0.000398983	0	0	0	0
Homo sapiens	hsa-miR-2110	UUGGGGAAACGGCCGCUGAGUG	22	0.701829	0	0	0	0
Homo sapiens	hsa-miR-2113	AUUUGUGCUUGGCUCUGUCAC	21	0.0153568	0	0	0	0
Homo sapiens	hsa-miR-2114-3p	CGAGCCUCAAGCAAGGGACUU	21	0.140463	0	0	0	0
Homo sapiens	hsa-miR-2114-5p	UAGUCCCUUCCUUGAAGCGGUC	22	0.00479319	0	0	0	0
Homo sapiens	hsa-miR-2115-3p	CAUCAGAAUUCAUGGAGGCUAG	22	0.0383513	0	0	0	0
Homo sapiens	hsa-miR-2115-5p	AGCUUCCAUGACUCCUGAUGGA	22	0.0143928	0	0	0	0
Homo sapiens	hsa-miR-2116-3p	CCUCCCAUGCCAAGAACUCCC	21	0.000387821	0	0	0	0
Homo sapiens	hsa-miR-2116-5p	GGUUCUUAGCAUAGGAGGUCU	21	0.717933	0	0	0	0
Homo sapiens	hsa-miR-2117	UGUUCUCUUUGCCAAGGACAG	21	0.0269666	0	0	0	0
Homo sapiens	hsa-miR-212-3p	UAACAGUCUCCAGUCACGGCC	21	0.0509905	0	0	0	0
Homo sapiens	hsa-miR-212-5p	ACCUUGGCUCUAGACUGCUUACU	23	0.0881142	0	0	0	0
Homo sapiens	hsa-miR-214-3p	ACAGCAGGCACAGACAGGCAGU	22	0.253269	0	0	0	0
Homo sapiens	hsa-miR-214-5p	UGCCUGUCUACACUUGCUGUGC	22	0.110197	0	0	0	0
Homo sapiens	hsa-miR-215-3p	UCUGUCAUUUCUUUAGGCCAAUA	23	0.00240701	0	0	0	0
Homo sapiens	hsa-miR-215-5p	AUGACCUAUGAAUUGACAGAC	21	0.00376603	0	0	0	0
Homo sapiens	hsa-miR-216a-3p	UCACAGUGGUCUCUGGGAUUAU	22	0.0776264	0	0	0	0
Homo sapiens	hsa-miR-216a-5p	UAAUCUCAGCUGGCAACUGUGA	22	0.261087	0	0	0	0
Homo sapiens	hsa-miR-216b-3p	ACACACUUACCCGUAGAGAUUCUA	24	0.00447986	0	0	0	0
Homo sapiens	hsa-miR-216b-5p	AAAUCUCUGCAGGCAAAUGUGA	22	0.277478	0	0	0	0
Homo sapiens	hsa-miR-217-3p	CAUCAGUUCCUAAUGCAUUGCC	22	0.0169055	0	0	0	0
Homo sapiens	hsa-miR-217-5p	UACUGCAUCAGGAACUGAUUGGA	23	0.380313	0	0	0	0
Homo sapiens	hsa-miR-218-1-3p	AUGGUUCCGUCAAGCACCAUGG	22	0.0554963	0	0	0	0
Homo sapiens	hsa-miR-218-2-3p	CAUGGUUCUGUCAAGCACCGCG	22	0.209157	0	0	0	0
Homo sapiens	hsa-miR-218-5p	UUGUGCUUGAUCUAACCAUGU	21	0.377493	0	0	0	0
Homo sapiens	hsa-miR-219a-1-3p	AGAGUUGAGUCUGGACGUCCCG	22	0.0176096	0	0	0	0
Homo sapiens	hsa-miR-219a-2-3p	AGAAUUGUGGCUGGACAUCUGU	22	0.273078	0	0	0	0
Homo sapiens	hsa-miR-219a-5p	UGAUUGUCCAAACGCAAUUCU	21	0.0210008	0	0	0	0
Homo sapiens	hsa-miR-219b-3p	AGAAUUGCGUUUGGACAAUCAGU	23	0.0185633	0	0	0	0
Homo sapiens	hsa-miR-219b-5p	AGAUGUCCAGCCACAAUUCUCG	22	0.00647532	0	0	0	0
Homo sapiens	hsa-miR-22-3p	AAGCUGCCAGUUGAAGAACUGU	22	0.111074	0	0	0	0
Homo sapiens	hsa-miR-22-5p	AGUUCUUCAGUGGCAAGCUUUA	22	0.0129142	0	0	0	0
Homo sapiens	hsa-miR-221-3p	AGCUACAUUGUCUGCUGGGUUUC	23	0.0294102	0	0	0	0
Homo sapiens	hsa-miR-221-5p	ACCUGGCAUACAAUGUAGAUUU	22	0.0257247	0	0	0	0
Homo sapiens	hsa-miR-222-3p	AGCUACAUCUGGCUACUGGGU	21	0.283192	0	0	0	0
Homo sapiens	hsa-miR-222-5p	CUCAGUAGCCAGUGUAGAUCCU	22	0.0175618	0	0	0	0
Homo sapiens	hsa-miR-223-3p	UGUCAGUUUGUCAAAUACCCCA	22	0.00148087	0	0	0	0
Homo sapiens	hsa-miR-223-5p	CGUGUAUUUGACAAGCUGAGUU	22	0.00354734	0	0	0	0
Homo sapiens	hsa-miR-224-3p	AAAAUGGUGCCCUAGUGACUACA	23	0.0139167	0	0	0	0
Homo sapiens	hsa-miR-224-5p	UCAAGUCACUAGUGGUUCCGUUUAG	25	0.0112099	0	0	0	0
Homo sapiens	hsa-miR-2276-3p	UCUGCAAGUGUCAGAGGCGAGG	22	0.0905466	0	0	0	0
Homo sapiens	hsa-miR-2276-5p	GCCCUCUGUCACCUUGCAGACG	22	0.0142119	0	0	0	0
Homo sapiens	hsa-miR-2277-3p	UGACAGCGCCCUGCCUGGCUC	21	0.0191985	0	0	0	0
Homo sapiens	hsa-miR-2277-5p	AGCGCGGGCUGAGCGCUGCCAGUC	24	0.197791	0	0	0	0
Homo sapiens	hsa-miR-2278	GAGAGCAGUGUGUGUUGCCUGG	22	0.109465	0	0	0	0
Homo sapiens	hsa-miR-2355-3p	AUUGUCCUUGCUGUUUGGAGAU	22	0.00692137	0	0	0	0
Homo sapiens	hsa-miR-2355-5p	AUCCCCAGAUACAAUGGACAA	21	0.00622068	0	0	0	0
Homo sapiens	hsa-miR-2392	UAGGAUGGGGGUGAGAGGUG	20	0.955663	1	GGAUGGGGGUGAGAGG	3	16
Homo sapiens	hsa-miR-23a-3p	AUCACAUUGCCAGGGAUUUCC	21	0.00533294	0	0	0	0
Homo sapiens	hsa-miR-23a-5p	GGGGUUCCUGGGGAUGGGAUUU	22	0.672536	0	0	0	0
Homo sapiens	hsa-miR-23b-3p	AUCACAUUGCCAGGGAUUACCAC	23	0.251851	0	0	0	0
Homo sapiens	hsa-miR-23b-5p	UGGGUUCCUGGCAUGCUGAUUU	22	0.0225351	0	0	0	0
Homo sapiens	hsa-miR-23c	AUCACAUUGCCAGUGAUUACCC	22	0.0199283	0	0	0	0
Homo sapiens	hsa-miR-24-1-5p	UGCCUACUGAGCUGAUAUCAGU	22	0.00971287	0	0	0	0
Homo sapiens	hsa-miR-24-2-5p	UGCCUACUGAGCUGAAACACAG	22	0.0458927	0	0	0	0
Homo sapiens	hsa-miR-24-3p	UGGCUCAGUUCAGCAGGAACAG	22	0.14845	0	0	0	0
Homo sapiens	hsa-miR-2467-3p	AGCAGAGGCAGAGAGGCUCAGG	22	0.0184353	0	0	0	0
Homo sapiens	hsa-miR-2467-5p	UGAGGCUCUGUUAGCCUUGGCUC	23	0.286097	0	0	0	0
Homo sapiens	hsa-miR-25-3p	CAUUGCACUUGUCUCGGUCUGA	22	0.179658	0	0	0	0
Homo sapiens	hsa-miR-25-5p	AGGCGGAGACUUGGGCAAUUG	21	0.33306	0	0	0	0
Homo sapiens	hsa-miR-2681-3p	UAUCAUGGAGUUGGUAAAGCAC	22	0.0524609	0	0	0	0
Homo sapiens	hsa-miR-2681-5p	GUUUUACCACCUCCAGGAGACU	22	0.00111328	0	0	0	0
Homo sapiens	hsa-miR-2682-3p	CGCCUCUUCAGCGCUGUCUUCC	22	0.00606017	0	0	0	0
Homo sapiens	hsa-miR-2682-5p	CAGGCAGUGACUGUUCAGACGUC	23	0.157153	0	0	0	0
Homo sapiens	hsa-miR-26a-1-3p	CCUAUUCUUGGUUACUUGCACG	22	0.0126868	0	0	0	0
Homo sapiens	hsa-miR-26a-2-3p	CCUAUUCUUGAUUACUUGUUUC	22	0.000662482	0	0	0	0
Homo sapiens	hsa-miR-26a-5p	UUCAAGUAAUCCAGGAUAGGCU	22	0.284028	0	0	0	0
Homo sapiens	hsa-miR-26b-3p	CCUGUUCUCCAUUACUUGGCU	21	0.0348025	0	0	0	0
Homo sapiens	hsa-miR-26b-5p	UUCAAGUAAUUCAGGAUAGGU	21	0.191235	0	0	0	0
Homo sapiens	hsa-miR-27a-3p	UUCACAGUGGCUAAGUUCCGC	21	0.0227227	0	0	0	0
Homo sapiens	hsa-miR-27a-5p	AGGGCUUAGCUGCUUGUGAGCA	22	0.529024	0	0	0	0
Homo sapiens	hsa-miR-27b-3p	UUCACAGUGGCUAAGUUCUGC	21	0.0883271	0	0	0	0
Homo sapiens	hsa-miR-27b-5p	AGAGCUUAGCUGAUUGGUGAAC	22	0.0972804	0	0	0	0
Homo sapiens	hsa-miR-28-3p	CACUAGAUUGUGAGCUCCUGGA	22	0.016833	0	0	0	0
Homo sapiens	hsa-miR-28-5p	AAGGAGCUCACAGUCUAUUGAG	22	0.00813505	0	0	0	0
Homo sapiens	hsa-miR-2861	GGGGCCUGGCGGUGGGCGG	19	0.928429	1	GGGGCCUGGCGGUGGGCGG	1	19
Homo sapiens	hsa-miR-2909	GUUAGGGCCAACAUCUCUUGG	21	0.72457	0	0	0	0
Homo sapiens	hsa-miR-296-3p	GAGGGUUGGGUGGAGGCUCUCC	22	0.743629	1	GGGUUGGGUGGAGG	3	14
Homo sapiens	hsa-miR-296-5p	AGGGCCCCCCCUCAAUCCUGU	21	0.000386395	0	0	0	0
Homo sapiens	hsa-miR-297	AUGUAUGUGUGCAUGUGCAUG	21	0.0916181	0	0	0	0
Homo sapiens	hsa-miR-298	AGCAGAAGCAGGGAGGUUCUCCCA	24	0.0263851	0	0	0	0
Homo sapiens	hsa-miR-299-3p	UAUGUGGGAUGGUAAACCGCUU	22	0.193384	0	0	0	0
Homo sapiens	hsa-miR-299-5p	UGGUUUACCGUCCCACAUACAU	22	0.00741106	0	0	0	0
Homo sapiens	hsa-miR-29a-3p	UAGCACCAUCUGAAAUCGGUUA	22	0.42254	0	0	0	0
Homo sapiens	hsa-miR-29a-5p	ACUGAUUUCUUUUGGUGUUCAG	22	0.000383646	0	0	0	0
Homo sapiens	hsa-miR-29b-1-5p	GCUGGUUUCAUAUGGUGGUUUAGA	24	0.00183309	0	0	0	0
Homo sapiens	hsa-miR-29b-2-5p	CUGGUUUCACAUGGUGGCUUAG	22	0.0714924	0	0	0	0
Homo sapiens	hsa-miR-29b-3p	UAGCACCAUUUGAAAUCAGUGUU	23	0.0195946	0	0	0	0
Homo sapiens	hsa-miR-29c-3p	UAGCACCAUUUGAAAUCGGUUA	22	0.0330537	0	0	0	0
Homo sapiens	hsa-miR-29c-5p	UGACCGAUUUCUCCUGGUGUUC	22	0.00253543	0	0	0	0
Homo sapiens	hsa-miR-300	UAUACAAGGGCAGACUCUCUCU	22	0.0368616	0	0	0	0
Homo sapiens	hsa-miR-301a-3p	CAGUGCAAUAGUAUUGUCAAAGC	23	0.0195737	0	0	0	0
Homo sapiens	hsa-miR-301a-5p	GCUCUGACUUUAUUGCACUACU	22	0.00145711	0	0	0	0
Homo sapiens	hsa-miR-301b-3p	CAGUGCAAUGAUAUUGUCAAAGC	23	0.0223258	0	0	0	0
Homo sapiens	hsa-miR-301b-5p	GCUCUGACGAGGUUGCACUACU	22	0.200143	0	0	0	0
Homo sapiens	hsa-miR-302a-3p	UAAGUGCUUCCAUGUUUUGGUGA	23	0.00352068	0	0	0	0
Homo sapiens	hsa-miR-302a-5p	ACUUAAACGUGGAUGUACUUGCU	23	0.541982	0	0	0	0
Homo sapiens	hsa-miR-302b-3p	UAAGUGCUUCCAUGUUUUAGUAG	23	0.0039021	0	0	0	0
Homo sapiens	hsa-miR-302b-5p	ACUUUAACAUGGAAGUGCUUUC	22	0.00961874	0	0	0	0
Homo sapiens	hsa-miR-302c-3p	UAAGUGCUUCCAUGUUUCAGUGG	23	0.00727953	0	0	0	0
Homo sapiens	hsa-miR-302c-5p	UUUAACAUGGGGGUACCUGCUG	22	0.566122	0	0	0	0
Homo sapiens	hsa-miR-302d-3p	UAAGUGCUUCCAUGUUUGAGUGU	23	0.0165593	0	0	0	0
Homo sapiens	hsa-miR-302d-5p	ACUUUAACAUGGAGGCACUUGC	22	0.122158	0	0	0	0
Homo sapiens	hsa-miR-302e	UAAGUGCUUCCAUGCUU	17	0.0486248	0	0	0	0
Homo sapiens	hsa-miR-302f	UAAUUGCUUCCAUGUUU	17	0.00206138	0	0	0	0
Homo sapiens	hsa-miR-3059-3p	CCUCUAGGGAAGAGAAGGUUGG	22	0.27394	0	0	0	0
Homo sapiens	hsa-miR-3059-5p	UUUCCUCUCUGCCCCAUAGGGUGU	24	0.00223539	0	0	0	0
Homo sapiens	hsa-miR-3064-3p	UUGCCACACUGCAACACCUUACA	23	0.198491	0	0	0	0
Homo sapiens	hsa-miR-3064-5p	UCUGGCUGUUGUGGUGUGCAA	21	0.654906	0	0	0	0
Homo sapiens	hsa-miR-3065-3p	UCAGCACCAGGAUAUUGUUGGAG	23	0.0572163	0	0	0	0
Homo sapiens	hsa-miR-3065-5p	UCAACAAAAUCACUGAUGCUGGA	23	0.176324	0	0	0	0
Homo sapiens	hsa-miR-3074-3p	GAUAUCAGCUCAGUAGGCACCG	22	0.0338252	0	0	0	0
Homo sapiens	hsa-miR-3074-5p	GUUCCUGCUGAACUGAGCCAG	21	0.0200982	0	0	0	0
Homo sapiens	hsa-miR-3085-3p	UCUGGCUGCUAUGGCCCCCUC	21	0.000336414	0	0	0	0
Homo sapiens	hsa-miR-3085-5p	AGGUGCCAUUCUGAGGGCCAGGAGU	25	0.252207	0	0	0	0
Homo sapiens	hsa-miR-30a-3p	CUUUCAGUCGGAUGUUUGCAGC	22	0.00335285	0	0	0	0
Homo sapiens	hsa-miR-30a-5p	UGUAAACAUCCUCGACUGGAAG	22	0.0899914	0	0	0	0
Homo sapiens	hsa-miR-30b-3p	CUGGGAGGUGGAUGUUUACUUC	22	0.28829	0	0	0	0
Homo sapiens	hsa-miR-30b-5p	UGUAAACAUCCUACACUCAGCU	22	0.0229119	0	0	0	0
Homo sapiens	hsa-miR-30c-1-3p	CUGGGAGAGGGUUGUUUACUCC	22	0.0685174	0	0	0	0
Homo sapiens	hsa-miR-30c-2-3p	CUGGGAGAAGGCUGUUUACUCU	22	0.0997641	0	0	0	0
Homo sapiens	hsa-miR-30c-5p	UGUAAACAUCCUACACUCUCAGC	23	0.0173001	0	0	0	0
Homo sapiens	hsa-miR-30d-3p	CUUUCAGUCAGAUGUUUGCUGC	22	0.000979605	0	0	0	0
Homo sapiens	hsa-miR-30d-5p	UGUAAACAUCCCCGACUGGAAG	22	0.00748427	0	0	0	0
Homo sapiens	hsa-miR-30e-3p	CUUUCAGUCGGAUGUUUACAGC	22	0.00379459	0	0	0	0
Homo sapiens	hsa-miR-30e-5p	UGUAAACAUCCUUGACUGGAAG	22	0.162323	0	0	0	0
Homo sapiens	hsa-miR-31-3p	UGCUAUGCCAACAUAUUGCCAU	22	0.00152142	0	0	0	0
Homo sapiens	hsa-miR-31-5p	AGGCAAGAUGCUGGCAUAGCU	21	0.49105	0	0	0	0
Homo sapiens	hsa-miR-3115	AUAUGGGUUUACUAGUUGGU	20	0.0253353	0	0	0	0
Homo sapiens	hsa-miR-3116	UGCCUGGAACAUAGUAGGGACU	22	0.817537	0	0	0	0
Homo sapiens	hsa-miR-3117-3p	AUAGGACUCAUAUAGUGCCAG	21	0.0825664	0	0	0	0
Homo sapiens	hsa-miR-3117-5p	AGACACUAUACGAGUCAUAU	20	0.000810227	0	0	0	0
Homo sapiens	hsa-miR-3118	UGUGACUGCAUUAUGAAAAUUCU	23	0.00667928	0	0	0	0
Homo sapiens	hsa-miR-3119	UGGCUUUUAACUUUGAUGGC	20	0.00112681	0	0	0	0
Homo sapiens	hsa-miR-3120-3p	CACAGCAAGUGUAGACAGGCA	21	0.248431	0	0	0	0
Homo sapiens	hsa-miR-3120-5p	CCUGUCUGUGCCUGCUGUACA	21	0.190238	0	0	0	0
Homo sapiens	hsa-miR-3121-3p	UAAAUAGAGUAGGCAAAGGACA	22	0.382064	0	0	0	0
Homo sapiens	hsa-miR-3121-5p	UCCUUUGCCUAUUCUAUUUAAG	22	2.62218e-05	0	0	0	0
Homo sapiens	hsa-miR-3122	GUUGGGACAAGAGGACGGUCUU	22	0.7581	0	0	0	0
Homo sapiens	hsa-miR-3123	CAGAGAAUUGUUUAAUC	17	0.00331706	0	0	0	0
Homo sapiens	hsa-miR-3124-3p	ACUUUCCUCACUCCCGUGAAGU	22	0.000404468	0	0	0	0
Homo sapiens	hsa-miR-3124-5p	UUCGCGGGCGAAGGCAAAGUC	21	0.323755	0	0	0	0
Homo sapiens	hsa-miR-3125	UAGAGGAAGCUGUGGAGAGA	20	0.0446203	0	0	0	0
Homo sapiens	hsa-miR-3126-3p	CAUCUGGCAUCCGUCACACAGA	22	0.0568468	0	0	0	0
Homo sapiens	hsa-miR-3126-5p	UGAGGGACAGAUGCCAGAAGCA	22	0.122618	0	0	0	0
Homo sapiens	hsa-miR-3127-3p	UCCCCUUCUGCAGGCCUGCUGG	22	0.00289136	0	0	0	0
Homo sapiens	hsa-miR-3127-5p	AUCAGGGCUUGUGGAAUGGGAAG	23	0.904413	0	0	0	0
Homo sapiens	hsa-miR-3128	UCUGGCAAGUAAAAAACUCUCAU	23	0.0649235	0	0	0	0
Homo sapiens	hsa-miR-3129-3p	AAACUAAUCUCUACACUGCUGC	22	0.0808594	0	0	0	0
Homo sapiens	hsa-miR-3129-5p	GCAGUAGUGUAGAGAUUGGUUU	22	0.0112652	0	0	0	0
Homo sapiens	hsa-miR-3130-3p	GCUGCACCGGAGACUGGGUAA	21	0.416838	0	0	0	0
Homo sapiens	hsa-miR-3130-5p	UACCCAGUCUCCGGUGCAGCC	21	0.00835447	0	0	0	0
Homo sapiens	hsa-miR-3131	UCGAGGACUGGUGGAAGGGCCUU	23	0.649398	1	GGACUGGUGGAAGGG	5	15
Homo sapiens	hsa-miR-3132	UGGGUAGAGAAGGAGCUCAGAGGA	24	0.0758676	0	0	0	0
Homo sapiens	hsa-miR-3133	UAAAGAACUCUUAAAACCCAAU	22	0.0193367	0	0	0	0
Homo sapiens	hsa-miR-3134	UGAUGGAUAAAAGACUACAUAUU	23	0.0186631	0	0	0	0
Homo sapiens	hsa-miR-3135a	UGCCUAGGCUGAGACUGCAGUG	22	0.0725115	0	0	0	0
Homo sapiens	hsa-miR-3135b	GGCUGGAGCGAGUGCAGUGGUG	22	0.280322	0	0	0	0
Homo sapiens	hsa-miR-3136-3p	UGGCCCAACCUAUUCAGUUAGU	22	0.00169643	0	0	0	0
Homo sapiens	hsa-miR-3136-5p	CUGACUGAAUAGGUAGGGUCAUU	23	0.608207	0	0	0	0
Homo sapiens	hsa-miR-3137	UCUGUAGCCUGGGAGCAAUGGGGU	24	0.772971	0	0	0	0
Homo sapiens	hsa-miR-3138	UGUGGACAGUGAGGUAGAGGGAGU	24	0.559384	0	0	0	0
Homo sapiens	hsa-miR-3139	UAGGAGCUCAACAGAUGCCUGUU	23	0.140597	0	0	0	0
Homo sapiens	hsa-miR-3140-3p	AGCUUUUGGGAAUUCAGGUAGU	22	0.00488759	0	0	0	0
Homo sapiens	hsa-miR-3140-5p	ACCUGAAUUACCAAAAGCUUU	21	0.00716851	0	0	0	0
Homo sapiens	hsa-miR-3141	GAGGGCGGGUGGAGGAGGA	19	0.972247	1	GGGCGGGUGGAGGAGG	3	16
Homo sapiens	hsa-miR-3142	AAGGCCUUUCUGAACCUUCAGA	22	0.00277746	0	0	0	0
Homo sapiens	hsa-miR-3143	AUAACAUUGUAAAGCGCUUCUUUCG	25	0.0150083	0	0	0	0
Homo sapiens	hsa-miR-3144-3p	AUAUACCUGUUCGGUCUCUUUA	22	0.00544016	0	0	0	0
Homo sapiens	hsa-miR-3144-5p	AGGGGACCAAAGAGAUAUAUAG	22	0.0210512	0	0	0	0
Homo sapiens	hsa-miR-3145-3p	AGAUAUUUUGAGUGUUUGGAAUUG	24	0.000231717	0	0	0	0
Homo sapiens	hsa-miR-3145-5p	AACUCCAAACACUCAAAACUCA	22	0.00609745	0	0	0	0
Homo sapiens	hsa-miR-3146	CAUGCUAGGAUAGAAAGAAUGG	22	0.176534	0	0	0	0
Homo sapiens	hsa-miR-3147	GGUUGGGCAGUGAGGAGGGUGUGA	24	0.917727	1	GGUUGGGCAGUGAGGAGGG	1	19
Homo sapiens	hsa-miR-3148	UGGAAAAAACUGGUGUGUGCUU	22	0.236407	0	0	0	0
Homo sapiens	hsa-miR-3149	UUUGUAUGGAUAUGUGUGUGUAU	23	0.00122636	0	0	0	0
Homo sapiens	hsa-miR-3150a-3p	CUGGGGAGAUCCUCGAGGUUGG	22	0.283733	0	0	0	0
Homo sapiens	hsa-miR-3150a-5p	CAACCUCGACGAUCUCCUCAGC	22	0.0166414	0	0	0	0
Homo sapiens	hsa-miR-3150b-3p	UGAGGAGAUCGUCGAGGUUGG	21	0.269695	0	0	0	0
Homo sapiens	hsa-miR-3150b-5p	CAACCUCGAGGAUCUCCCCAGC	22	0.00431468	0	0	0	0
Homo sapiens	hsa-miR-3151-3p	CCUGAUCCCACAGCCCACCU	20	0.00287381	0	0	0	0
Homo sapiens	hsa-miR-3151-5p	GGUGGGGCAAUGGGAUCAGGU	21	0.975634	1	GGUGGGGCAAUGGGAUCAGG	1	20
Homo sapiens	hsa-miR-3152-3p	UGUGUUAGAAUAGGGGCAAUAA	22	0.936995	0	0	0	0
Homo sapiens	hsa-miR-3152-5p	AUUGCCUCUGUUCUAACACAAG	22	0.0717226	0	0	0	0
Homo sapiens	hsa-miR-3153	GGGGAAAGCGAGUAGGGACAUUU	23	0.239834	0	0	0	0
Homo sapiens	hsa-miR-3154	CAGAAGGGGAGUUGGGAGCAGA	22	0.684769	0	0	0	0
Homo sapiens	hsa-miR-3155a	CCAGGCUCUGCAGUGGGAACU	21	0.659489	0	0	0	0
Homo sapiens	hsa-miR-3155b	CCAGGCUCUGCAGUGGGA	18	0.69818	0	0	0	0
Homo sapiens	hsa-miR-3156-3p	CUCCCACUUCCAGAUCUUUCU	21	0.000208293	0	0	0	0
Homo sapiens	hsa-miR-3156-5p	AAAGAUCUGGAAGUGGGAGACA	22	0.328983	0	0	0	0
Homo sapiens	hsa-miR-3157-3p	CUGCCCUAGUCUAGCUGAAGCU	22	0.0170574	0	0	0	0
Homo sapiens	hsa-miR-3157-5p	UUCAGCCAGGCUAGUGCAGUCU	22	0.062033	0	0	0	0
Homo sapiens	hsa-miR-3158-3p	AAGGGCUUCCUCUCUGCAGGAC	22	0.20118	0	0	0	0
Homo sapiens	hsa-miR-3158-5p	CCUGCAGAGAGGAAGCCCUUC	21	0.00457016	0	0	0	0
Homo sapiens	hsa-miR-3159	UAGGAUUACAAGUGUCGGCCAC	22	0.433861	0	0	0	0
Homo sapiens	hsa-miR-3160-3p	AGAGCUGAGACUAGAAAGCCCA	22	0.00104532	0	0	0	0
Homo sapiens	hsa-miR-3160-5p	GGCUUUCUAGUCUCAGCUCUCC	22	0.00142008	0	0	0	0
Homo sapiens	hsa-miR-3161	CUGAUAAGAACAGAGGCCCAGAU	23	0.0171101	0	0	0	0
Homo sapiens	hsa-miR-3162-3p	UCCCUACCCCUCCACUCCCCA	21	4.31027e-05	0	0	0	0
Homo sapiens	hsa-miR-3162-5p	UUAGGGAGUAGAAGGGUGGGGAG	23	0.972243	0	0	0	0
Homo sapiens	hsa-miR-3163	UAUAAAAUGAGGGCAGUAAGAC	22	0.0468149	0	0	0	0
Homo sapiens	hsa-miR-3164	UGUGACUUUAAGGGAAAUGGCG	22	0.253601	0	0	0	0
Homo sapiens	hsa-miR-3165	AGGUGGAUGCAAUGUGACCUCA	22	0.49293	0	0	0	0
Homo sapiens	hsa-miR-3166	CGCAGACAAUGCCUACUGGCCUA	23	0.0188033	0	0	0	0
Homo sapiens	hsa-miR-3167	AGGAUUUCAGAAAUACUGGUGU	22	0.0104299	0	0	0	0
Homo sapiens	hsa-miR-3168	GAGUUCUACAGUCAGAC	17	0.0106026	0	0	0	0
Homo sapiens	hsa-miR-3169	UAGGACUGUGCUUGGCACAUAG	22	0.762545	0	0	0	0
Homo sapiens	hsa-miR-3170	CUGGGGUUCUGAGACAGACAGU	22	0.196285	0	0	0	0
Homo sapiens	hsa-miR-3171	AGAUGUAUGGAAUCUGUAUAUAUC	24	0.000874283	0	0	0	0
Homo sapiens	hsa-miR-3173-3p	AAAGGAGGAAAUAGGCAGGCCA	22	0.653208	1	GGAGGAAAUAGGCAGG	4	16
Homo sapiens	hsa-miR-3173-5p	UGCCCUGCCUGUUUUCUCCUUU	22	8.40819e-05	0	0	0	0
Homo sapiens	hsa-miR-3174	UAGUGAGUUAGAGAUGCAGAGCC	23	0.0270315	0	0	0	0
Homo sapiens	hsa-miR-3175	CGGGGAGAGAACGCAGUGACGU	22	0.39419	0	0	0	0
Homo sapiens	hsa-miR-3176	ACUGGCCUGGGACUACCGG	19	0.326676	0	0	0	0
Homo sapiens	hsa-miR-3177-3p	UGCACGGCACUGGGGACACGU	21	0.923375	0	0	0	0
Homo sapiens	hsa-miR-3177-5p	UGUGUACACACGUGCCAGGCGCU	23	0.396643	0	0	0	0
Homo sapiens	hsa-miR-3178	GGGGCGCGGCCGGAUCG	17	0.91168	0	0	0	0
Homo sapiens	hsa-miR-3179	AGAAGGGGUGAAAUUUAAACGU	22	0.103593	0	0	0	0
Homo sapiens	hsa-miR-3180	UGGGGCGGAGCUUCCGGAG	19	0.262306	0	0	0	0
Homo sapiens	hsa-miR-3180-3p	UGGGGCGGAGCUUCCGGAGGCC	22	0.267846	1	GGGGCGGAGCUUCCGGAGG	2	19
Homo sapiens	hsa-miR-3180-5p	CUUCCAGACGCUCCGCCCCACGUCG	25	0.00104429	0	0	0	0
Homo sapiens	hsa-miR-3181	AUCGGGCCCUCGGCGCCGG	19	0.0566575	0	0	0	0
Homo sapiens	hsa-miR-3182	GCUUCUGUAGUGUAGUC	17	0.235537	0	0	0	0
Homo sapiens	hsa-miR-3183	GCCUCUCUCGGAGUCGCUCGGA	22	0.142786	0	0	0	0
Homo sapiens	hsa-miR-3184-3p	AAAGUCUCGCUCUCUGCCCCUCA	23	0.00300742	0	0	0	0
Homo sapiens	hsa-miR-3184-5p	UGAGGGGCCUCAGACCGAGCUUUU	24	0.0022454	0	0	0	0
Homo sapiens	hsa-miR-3185	AGAAGAAGGCGGUCGGUCUGCGG	23	0.152426	1	GGCGGUCGGUCUGCGG	8	16
Homo sapiens	hsa-miR-3186-3p	UCACGCGGAGAGAUGGCUUUG	21	0.00753571	0	0	0	0
Homo sapiens	hsa-miR-3186-5p	CAGGCGUCUGUCUACGUGGCUU	22	0.373725	0	0	0	0
Homo sapiens	hsa-miR-3187-3p	UUGGCCAUGGGGCUGCGCGG	20	0.731624	0	0	0	0
Homo sapiens	hsa-miR-3187-5p	CCUGGGCAGCGUGUGGCUGAAGG	23	0.644909	0	0	0	0
Homo sapiens	hsa-miR-3188	AGAGGCUUUGUGCGGAUACGGGG	23	0.301896	0	0	0	0
Homo sapiens	hsa-miR-3189-3p	CCCUUGGGUCUGAUGGGGUAG	21	0.756866	0	0	0	0
Homo sapiens	hsa-miR-3189-5p	UGCCCCAUCUGUGCCCUGGGUAGGA	25	0.0227211	0	0	0	0
Homo sapiens	hsa-miR-3190-3p	UGUGGAAGGUAGACGGCCAGAGA	23	0.0676223	0	0	0	0
Homo sapiens	hsa-miR-3190-5p	UCUGGCCAGCUACGUCCCCA	20	0.00142969	0	0	0	0
Homo sapiens	hsa-miR-3191-3p	UGGGGACGUAGCUGGCCAGACAG	23	0.524351	0	0	0	0
Homo sapiens	hsa-miR-3191-5p	CUCUCUGGCCGUCUACCUUCCA	22	0.00665252	0	0	0	0
Homo sapiens	hsa-miR-3192-3p	CUCUGAUCGCCCUCUCAGCUC	21	0.0114796	0	0	0	0
Homo sapiens	hsa-miR-3192-5p	UCUGGGAGGUUGUAGCAGUGGAA	23	0.794553	0	0	0	0
Homo sapiens	hsa-miR-3193	UCCUGCGUAGGAUCUGAGGAGU	22	0.265347	0	0	0	0
Homo sapiens	hsa-miR-3194-3p	AGCUCUGCUGCUCACUGGCAGU	22	0.137531	0	0	0	0
Homo sapiens	hsa-miR-3194-5p	GGCCAGCCACCAGGAGGGCUG	21	0.359401	0	0	0	0
Homo sapiens	hsa-miR-3195	CGCGCCGGGCCCGGGUU	17	0.230091	0	0	0	0
Homo sapiens	hsa-miR-3196	CGGGGCGGCAGGGGCCUC	18	0.969902	0	0	0	0
Homo sapiens	hsa-miR-3197	GGAGGCGCAGGCUCGGAAAGGCG	23	0.625913	1	GGAGGCGCAGGCUCGGAAAGG	1	21
Homo sapiens	hsa-miR-3198	GUGGAGUCCUGGGGAAUGGAGA	22	0.390143	0	0	0	0
Homo sapiens	hsa-miR-3199	AGGGACUGCCUUAGGAGAAAGUU	23	0.492312	0	0	0	0
Homo sapiens	hsa-miR-32-3p	CAAUUUAGUGUGUGUGAUAUUU	22	0.00159252	0	0	0	0
Homo sapiens	hsa-miR-32-5p	UAUUGCACAUUACUAAGUUGCA	22	0.0171219	0	0	0	0
Homo sapiens	hsa-miR-3200-3p	CACCUUGCGCUACUCAGGUCUG	22	0.1109	0	0	0	0
Homo sapiens	hsa-miR-3200-5p	AAUCUGAGAAGGCGCACAAGGU	22	0.377341	0	0	0	0
Homo sapiens	hsa-miR-3201	GGGAUAUGAAGAAAAAU	17	0.0181518	0	0	0	0
Homo sapiens	hsa-miR-3202	UGGAAGGGAGAAGAGCUUUAAU	22	0.048725	0	0	0	0
Homo sapiens	hsa-miR-320a-3p	AAAAGCUGGGUUGAGAGGGCGA	22	0.273461	0	0	0	0
Homo sapiens	hsa-miR-320a-5p	GCCUUCUCUUCCCGGUUCUUCC	22	0.000758201	0	0	0	0
Homo sapiens	hsa-miR-320b	AAAAGCUGGGUUGAGAGGGCAA	22	0.430767	0	0	0	0
Homo sapiens	hsa-miR-320c	AAAAGCUGGGUUGAGAGGGU	20	0.460277	0	0	0	0
Homo sapiens	hsa-miR-320d	AAAAGCUGGGUUGAGAGGA	19	0.267817	0	0	0	0
Homo sapiens	hsa-miR-320e	AAAGCUGGGUUGAGAAGG	18	0.368716	0	0	0	0
Homo sapiens	hsa-miR-323a-3p	CACAUUACACGGUCGACCUCU	21	0.194683	0	0	0	0
Homo sapiens	hsa-miR-323a-5p	AGGUGGUCCGUGGCGCGUUCGC	22	0.194159	0	0	0	0
Homo sapiens	hsa-miR-323b-3p	CCCAAUACACGGUCGACCUCUU	22	0.0584693	0	0	0	0
Homo sapiens	hsa-miR-323b-5p	AGGUUGUCCGUGGUGAGUUCGCA	23	0.205985	0	0	0	0
Homo sapiens	hsa-miR-324-3p	CCCACUGCCCCAGGUGCUGCUGG	23	0.00631751	0	0	0	0
Homo sapiens	hsa-miR-324-5p	CGCAUCCCCUAGGGCAUUGGUG	22	0.0176524	0	0	0	0
Homo sapiens	hsa-miR-325	CCUAGUAGGUGUCCAGUAAGUGU	23	0.157923	0	0	0	0
Homo sapiens	hsa-miR-326	CCUCUGGGCCCUUCCUCCAG	20	0.00175886	0	0	0	0
Homo sapiens	hsa-miR-328-3p	CUGGCCCUCUCUGCCCUUCCGU	22	0.000842229	0	0	0	0
Homo sapiens	hsa-miR-328-5p	GGGGGGGCAGGAGGGGCUCAGGG	23	0.997725	1	GGGGGGGCAGGAGGGGCUCAGGG	1	23
Homo sapiens	hsa-miR-329-3p	AACACACCUGGUUAACCUCUUU	22	0.0795881	0	0	0	0
Homo sapiens	hsa-miR-329-5p	GAGGUUUUCUGGGUUUCUGUUUC	23	0.000610124	0	0	0	0
Homo sapiens	hsa-miR-330-3p	GCAAAGCACACGGCCUGCAGAGA	23	0.0380124	0	0	0	0
Homo sapiens	hsa-miR-330-5p	UCUCUGGGCCUGUGUCUUAGGC	22	0.565155	0	0	0	0
Homo sapiens	hsa-miR-331-3p	GCCCCUGGGCCUAUCCUAGAA	21	0.00027232	0	0	0	0
Homo sapiens	hsa-miR-331-5p	CUAGGUAUGGUCCCAGGGAUCC	22	0.00748358	0	0	0	0
Homo sapiens	hsa-miR-335-3p	UUUUUCAUUAUUGCUCCUGACC	22	3.43654e-05	0	0	0	0
Homo sapiens	hsa-miR-335-5p	UCAAGAGCAAUAACGAAAAAUGU	23	0.0432617	0	0	0	0
Homo sapiens	hsa-miR-337-3p	CUCCUAUAUGAUGCCUUUCUUC	22	0.000104827	0	0	0	0
Homo sapiens	hsa-miR-337-5p	GAACGGCUUCAUACAGGAGUU	21	0.420074	0	0	0	0
Homo sapiens	hsa-miR-338-3p	UCCAGCAUCAGUGAUUUUGUUG	22	0.00132237	0	0	0	0
Homo sapiens	hsa-miR-338-5p	AACAAUAUCCUGGUGCUGAGUG	22	0.0268174	0	0	0	0
Homo sapiens	hsa-miR-339-3p	UGAGCGCCUCGACGACAGAGCCG	23	0.00946269	0	0	0	0
Homo sapiens	hsa-miR-339-5p	UCCCUGUCCUCCAGGAGCUCACG	23	0.00234457	0	0	0	0
Homo sapiens	hsa-miR-33a-3p	CAAUGUUUCCACAGUGCAUCAC	22	0.00852793	0	0	0	0
Homo sapiens	hsa-miR-33a-5p	GUGCAUUGUAGUUGCAUUGCA	21	0.220772	0	0	0	0
Homo sapiens	hsa-miR-33b-3p	CAGUGCCUCGGCAGUGCAGCCC	22	0.0284275	0	0	0	0
Homo sapiens	hsa-miR-33b-5p	GUGCAUUGCUGUUGCAUUGC	20	0.20921	0	0	0	0
Homo sapiens	hsa-miR-340-3p	UCCGUCUCAGUUACUUUAUAGC	22	0.00148246	0	0	0	0
Homo sapiens	hsa-miR-340-5p	UUAUAAAGCAAUGAGACUGAUU	22	0.0128524	0	0	0	0
Homo sapiens	hsa-miR-342-3p	UCUCACACAGAAAUCGCACCCGU	23	0.0157125	0	0	0	0
Homo sapiens	hsa-miR-342-5p	AGGGGUGCUAUCUGUGAUUGA	21	0.173923	0	0	0	0
Homo sapiens	hsa-miR-345-3p	GCCCUGAACGAGGGGUCUGGAG	22	0.29915	0	0	0	0
Homo sapiens	hsa-miR-345-5p	GCUGACUCCUAGUCCAGGGCUC	22	0.0335942	0	0	0	0
Homo sapiens	hsa-miR-346	UGUCUGCCCGCAUGCCUGCCUCU	23	0.0210709	0	0	0	0
Homo sapiens	hsa-miR-34a-3p	CAAUCAGCAAGUAUACUGCCCU	22	0.00563204	0	0	0	0
Homo sapiens	hsa-miR-34a-5p	UGGCAGUGUCUUAGCUGGUUGU	22	0.559459	0	0	0	0
Homo sapiens	hsa-miR-34b-3p	CAAUCACUAACUCCACUGCCAU	22	0.0229564	0	0	0	0
Homo sapiens	hsa-miR-34b-5p	UAGGCAGUGUCAUUAGCUGAUUG	23	0.234031	0	0	0	0
Homo sapiens	hsa-miR-34c-3p	AAUCACUAACCACACGGCCAGG	22	0.191927	0	0	0	0
Homo sapiens	hsa-miR-34c-5p	AGGCAGUGUAGUUAGCUGAUUGC	23	0.458855	0	0	0	0
Homo sapiens	hsa-miR-3529-3p	AACAACAAAAUCACUAGUCUUCCA	24	0.0159175	0	0	0	0
Homo sapiens	hsa-miR-3529-5p	AGGUAGACUGGGAUUUGUUGUU	22	0.153542	0	0	0	0
Homo sapiens	hsa-miR-3605-3p	CCUCCGUGUUACCUGUCCUCUAG	23	0.0186352	0	0	0	0
Homo sapiens	hsa-miR-3605-5p	UGAGGAUGGAUAGCAAGGAAGCC	23	0.745994	0	0	0	0
Homo sapiens	hsa-miR-3606-3p	AAAAUUUCUUUCACUACUUAG	21	0.000256018	0	0	0	0
Homo sapiens	hsa-miR-3606-5p	UUAGUGAAGGCUAUUUUAAUU	21	0.000646792	0	0	0	0
Homo sapiens	hsa-miR-3609	CAAAGUGAUGAGUAAUACUGGCUG	24	0.416165	0	0	0	0
Homo sapiens	hsa-miR-361-3p	UCCCCCAGGUGUGAUUCUGAUUU	23	0.000413008	0	0	0	0
Homo sapiens	hsa-miR-361-5p	UUAUCAGAAUCUCCAGGGGUAC	22	0.0200297	0	0	0	0
Homo sapiens	hsa-miR-3610	GAAUCGGAAAGGAGGCGCCG	20	0.533062	0	0	0	0
Homo sapiens	hsa-miR-3611	UUGUGAAGAAAGAAAUUCUUA	21	0.0130442	0	0	0	0
Homo sapiens	hsa-miR-3612	AGGAGGCAUCUUGAGAAAUGGA	22	0.315801	0	0	0	0
Homo sapiens	hsa-miR-3613-3p	ACAAAAAAAAAAGCCCAACCCUUC	24	0.00111144	0	0	0	0
Homo sapiens	hsa-miR-3613-5p	UGUUGUACUUUUUUUUUUGUUC	22	1.24383e-05	0	0	0	0
Homo sapiens	hsa-miR-3614-3p	UAGCCUUCAGAUCUUGGUGUUUU	23	0.00204551	0	0	0	0
Homo sapiens	hsa-miR-3614-5p	CCACUUGGAUCUGAAGGCUGCCC	23	0.169315	0	0	0	0
Homo sapiens	hsa-miR-3615	UCUCUCGGCUCCUCGCGGCUC	21	0.0350864	0	0	0	0
Homo sapiens	hsa-miR-3616-3p	CGAGGGCAUUUCAUGAUGCAGGC	23	0.0329102	0	0	0	0
Homo sapiens	hsa-miR-3616-5p	AUGAAGUGCACUCAUGAUAUGU	22	0.0469937	0	0	0	0
Homo sapiens	hsa-miR-3617-3p	CAUCAGCACCCUAUGUCCUUUCU	23	0.000349981	0	0	0	0
Homo sapiens	hsa-miR-3617-5p	AAAGACAUAGUUGCAAGAUGGG	22	0.382254	0	0	0	0
Homo sapiens	hsa-miR-3618	UGUCUACAUUAAUGAAAAGAGC	22	0.0256078	0	0	0	0
Homo sapiens	hsa-miR-3619-3p	GGGACCAUCCUGCCUGCUGUGG	22	0.227564	0	0	0	0
Homo sapiens	hsa-miR-3619-5p	UCAGCAGGCAGGCUGGUGCAGC	22	0.311755	0	0	0	0
Homo sapiens	hsa-miR-362-3p	AACACACCUAUUCAAGGAUUCA	22	0.00356542	0	0	0	0
Homo sapiens	hsa-miR-362-5p	AAUCCUUGGAACCUAGGUGUGAGU	24	0.175306	0	0	0	0
Homo sapiens	hsa-miR-3620-3p	UCACCCUGCAUCCCGCACCCAG	22	0.00150352	0	0	0	0
Homo sapiens	hsa-miR-3620-5p	GUGGGCUGGGCUGGGCUGGGCC	22	0.969815	1	GGGCUGGGCUGGGCUGGG	3	18
Homo sapiens	hsa-miR-3621	CGCGGGUCGGGGUCUGCAGG	20	0.936175	0	0	0	0
Homo sapiens	hsa-miR-3622a-3p	UCACCUGACCUCCCAUGCCUGU	22	0.00614271	0	0	0	0
Homo sapiens	hsa-miR-3622a-5p	CAGGCACGGGAGCUCAGGUGAG	22	0.581607	0	0	0	0
Homo sapiens	hsa-miR-3622b-3p	UCACCUGAGCUCCCGUGCCUG	21	0.00391855	0	0	0	0
Homo sapiens	hsa-miR-3622b-5p	AGGCAUGGGAGGUCAGGUGA	20	0.847674	1	GGCAUGGGAGGUCAGG	2	16
Homo sapiens	hsa-miR-363-3p	AAUUGCACGGUAUCCAUCUGUA	22	0.0121967	0	0	0	0
Homo sapiens	hsa-miR-363-5p	CGGGUGGAUCACGAUGCAAUUU	22	0.114651	0	0	0	0
Homo sapiens	hsa-miR-3646	AAAAUGAAAUGAGCCCAGCCCA	22	0.00149049	0	0	0	0
Homo sapiens	hsa-miR-3648	AGCCGCGGGGAUCGCCGAGGG	21	0.724018	0	0	0	0
Homo sapiens	hsa-miR-3649	AGGGACCUGAGUGUCUAAG	19	0.629989	0	0	0	0
Homo sapiens	hsa-miR-3650	AGGUGUGUCUGUAGAGUCC	19	0.0815198	0	0	0	0
Homo sapiens	hsa-miR-3651	CAUAGCCCGGUCGCUGGUACAUGA	24	0.11578	0	0	0	0
Homo sapiens	hsa-miR-3652	CGGCUGGAGGUGUGAGGA	18	0.764188	1	GGCUGGAGGUGUGAGG	2	16
Homo sapiens	hsa-miR-3654	GACUGGACAAGCUGAGGAA	19	0.55069	0	0	0	0
Homo sapiens	hsa-miR-3655	GCUUGUCGCUGCGGUGUUGCU	21	0.524586	0	0	0	0
Homo sapiens	hsa-miR-3657	UGUGUCCCAUUAUUGGUGAUU	21	0.00156009	0	0	0	0
Homo sapiens	hsa-miR-3658	UUUAAGAAAACACCAUGGAGAU	22	0.0115351	0	0	0	0
Homo sapiens	hsa-miR-3659	UGAGUGUUGUCUACGAGGGCA	21	0.38617	0	0	0	0
Homo sapiens	hsa-miR-365a-3p	UAAUGCCCCUAAAAAUCCUUAU	22	0.000378614	0	0	0	0
Homo sapiens	hsa-miR-365a-5p	AGGGACUUUUGGGGGCAGAUGUG	23	0.188418	0	0	0	0
Homo sapiens	hsa-miR-365b-3p	UAAUGCCCCUAAAAAUCCUUAU	22	0.000378614	0	0	0	0
Homo sapiens	hsa-miR-365b-5p	AGGGACUUUCAGGGGCAGCUGU	22	0.294921	0	0	0	0
Homo sapiens	hsa-miR-3660	ACUGACAGGAGAGCAUUUUGA	21	0.00126241	0	0	0	0
Homo sapiens	hsa-miR-3661	UGACCUGGGACUCGGACAGCUG	22	0.561664	0	0	0	0
Homo sapiens	hsa-miR-3662	GAAAAUGAUGAGUAGUGACUGAUG	24	0.226128	0	0	0	0
Homo sapiens	hsa-miR-3663-3p	UGAGCACCACACAGGCCGGGCGC	23	0.329622	0	0	0	0
Homo sapiens	hsa-miR-3663-5p	GCUGGUCUGCGUGGUGCUCGG	21	0.439319	0	0	0	0
Homo sapiens	hsa-miR-3664-3p	UCUCAGGAGUAAAGACAGAGUU	22	0.0454741	0	0	0	0
Homo sapiens	hsa-miR-3664-5p	AACUCUGUCUUCACUCAUGAGU	22	0.0350907	0	0	0	0
Homo sapiens	hsa-miR-3665	AGCAGGUGCGGGGCGGCG	18	0.864702	0	0	0	0
Homo sapiens	hsa-miR-3666	CAGUGCAAGUGUAGAUGCCGA	21	0.103707	0	0	0	0
Homo sapiens	hsa-miR-3667-3p	ACCUUCCUCUCCAUGGGUCUUU	22	0.00279399	0	0	0	0
Homo sapiens	hsa-miR-3667-5p	AAAGACCCAUUGAGGAGAAGGU	22	0.016119	0	0	0	0
Homo sapiens	hsa-miR-3668	AAUGUAGAGAUUGAUCAAAAU	21	0.0199452	0	0	0	0
Homo sapiens	hsa-miR-367-3p	AAUUGCACUUUAGCAAUGGUGA	22	0.0357158	0	0	0	0
Homo sapiens	hsa-miR-367-5p	ACUGUUGCUAAUAUGCAACUCU	22	0.0518742	0	0	0	0
Homo sapiens	hsa-miR-3670	AGAGCUCACAGCUGUCCUUCUCUA	24	0.00401829	0	0	0	0
Homo sapiens	hsa-miR-3671	AUCAAAUAAGGACUAGUCUGCA	22	0.367149	0	0	0	0
Homo sapiens	hsa-miR-3672	AUGAGACUCAUGUAAAACAUCUU	23	0.0544347	0	0	0	0
Homo sapiens	hsa-miR-3674	AUUGUAGAACCUAAGAUUGGCC	22	0.018157	0	0	0	0
Homo sapiens	hsa-miR-3675-3p	CAUCUCUAAGGAACUCCCCCAA	22	0.00231201	0	0	0	0
Homo sapiens	hsa-miR-3675-5p	UAUGGGGCUUCUGUAGAGAUUUC	23	0.00183339	0	0	0	0
Homo sapiens	hsa-miR-3677-3p	CUCGUGGGCUCUGGCCACGGCC	22	0.371785	0	0	0	0
Homo sapiens	hsa-miR-3677-5p	CAGUGGCCAGAGCCCUGCAGUG	22	0.011756	0	0	0	0
Homo sapiens	hsa-miR-3678-3p	CUGCAGAGUUUGUACGGACCGG	22	0.0276518	0	0	0	0
Homo sapiens	hsa-miR-3678-5p	UCCGUACAAACUCUGCUGUG	20	0.0434024	0	0	0	0
Homo sapiens	hsa-miR-3679-3p	CUUCCCCCCAGUAAUCUUCAUC	22	0.000338241	0	0	0	0
Homo sapiens	hsa-miR-3679-5p	UGAGGAUAUGGCAGGGAAGGGGA	23	0.887856	1	GGAUAUGGCAGGGAAGGGG	4	19
Homo sapiens	hsa-miR-3680-3p	UUUUGCAUGACCCUGGGAGUAGG	23	0.00634079	0	0	0	0
Homo sapiens	hsa-miR-3680-5p	GACUCACUCACAGGAUUGUGCA	22	0.138021	0	0	0	0
Homo sapiens	hsa-miR-3681-3p	ACACAGUGCUUCAUCCACUACU	22	0.0216924	0	0	0	0
Homo sapiens	hsa-miR-3681-5p	UAGUGGAUGAUGCACUCUGUGC	22	0.569913	0	0	0	0
Homo sapiens	hsa-miR-3682-3p	UGAUGAUACAGGUGGAGGUAG	21	0.812441	0	0	0	0
Homo sapiens	hsa-miR-3682-5p	CUACUUCUACCUGUGUUAUCAU	22	0.00722735	0	0	0	0
Homo sapiens	hsa-miR-3683	UGCGACAUUGGAAGUAGUAUCA	22	0.0179373	0	0	0	0
Homo sapiens	hsa-miR-3684	UUAGACCUAGUACACGUCCUU	21	0.0286792	0	0	0	0
Homo sapiens	hsa-miR-3685	UUUCCUACCCUACCUGAAGACU	22	0.000366754	0	0	0	0
Homo sapiens	hsa-miR-3686	AUCUGUAAGAGAAAGUAAAUGA	22	0.0531765	0	0	0	0
Homo sapiens	hsa-miR-3688-3p	UAUGGAAAGACUUUGCCACUCU	22	0.00133449	0	0	0	0
Homo sapiens	hsa-miR-3688-5p	AGUGGCAAAGUCUUUCCAUAU	21	0.00106857	0	0	0	0
Homo sapiens	hsa-miR-3689a-3p	CUGGGAGGUGUGAUAUCGUGGU	22	0.443954	0	0	0	0
Homo sapiens	hsa-miR-3689a-5p	UGUGAUAUCAUGGUUCCUGGGA	22	0.0543934	0	0	0	0
Homo sapiens	hsa-miR-3689b-3p	CUGGGAGGUGUGAUAUUGUGGU	22	0.282241	0	0	0	0
Homo sapiens	hsa-miR-3689b-5p	UGUGAUAUCAUGGUUCCUGGGA	22	0.0543934	0	0	0	0
Homo sapiens	hsa-miR-3689c	CUGGGAGGUGUGAUAUUGUGGU	22	0.282241	0	0	0	0
Homo sapiens	hsa-miR-3689d	GGGAGGUGUGAUCUCACACUCG	22	0.616492	0	0	0	0
Homo sapiens	hsa-miR-3689e	UGUGAUAUCAUGGUUCCUGGGA	22	0.0543934	0	0	0	0
Homo sapiens	hsa-miR-3689f	UGUGAUAUCGUGCUUCCUGGGA	22	0.0462768	0	0	0	0
Homo sapiens	hsa-miR-369-3p	AAUAAUACAUGGUUGAUCUUU	21	0.26856	0	0	0	0
Homo sapiens	hsa-miR-369-5p	AGAUCGACCGUGUUAUAUUCGC	22	0.001909	0	0	0	0
Homo sapiens	hsa-miR-3690	ACCUGGACCCAGCGUAGACAAAG	23	0.034855	0	0	0	0
Homo sapiens	hsa-miR-3691-3p	ACCAAGUCUGCGUCAUCCUCUC	22	0.0476606	0	0	0	0
Homo sapiens	hsa-miR-3691-5p	AGUGGAUGAUGGAGACUCGGUAC	23	0.30729	0	0	0	0
Homo sapiens	hsa-miR-3692-3p	GUUCCACACUGACACUGCAGAAGU	24	0.0367054	0	0	0	0
Homo sapiens	hsa-miR-3692-5p	CCUGCUGGUCAGGAGUGGAUACUG	24	0.551909	0	0	0	0
Homo sapiens	hsa-miR-370-3p	GCCUGCUGGGGUGGAACCUGGU	22	0.821794	0	0	0	0
Homo sapiens	hsa-miR-370-5p	CAGGUCACGUCUCUGCAGUUAC	22	0.39607	0	0	0	0
Homo sapiens	hsa-miR-3713	GGUAUCCGUUUGGGGAUGGU	20	0.0255888	0	0	0	0
Homo sapiens	hsa-miR-3714	GAAGGCAGCAGUGCUCCCCUGU	22	0.0084709	0	0	0	0
Homo sapiens	hsa-miR-371a-3p	AAGUGCCGCCAUCUUUUGAGUGU	23	0.00356222	0	0	0	0
Homo sapiens	hsa-miR-371a-5p	ACUCAAACUGUGGGGGCACU	20	0.802157	0	0	0	0
Homo sapiens	hsa-miR-371b-3p	AAGUGCCCCCACAGUUUGAGUGC	23	0.00115813	0	0	0	0
Homo sapiens	hsa-miR-371b-5p	ACUCAAAAGAUGGCGGCACUUU	22	0.00738123	0	0	0	0
Homo sapiens	hsa-miR-372-3p	AAAGUGCUGCGACAUUUGAGCGU	23	0.00994152	0	0	0	0
Homo sapiens	hsa-miR-372-5p	CCUCAAAUGUGGAGCACUAUUCU	23	0.00395085	0	0	0	0
Homo sapiens	hsa-miR-373-3p	GAAGUGCUUCGAUUUUGGGGUGU	23	0.0140896	0	0	0	0
Homo sapiens	hsa-miR-373-5p	ACUCAAAAUGGGGGCGCUUUCC	22	0.0228594	0	0	0	0
Homo sapiens	hsa-miR-374a-3p	CUUAUCAGAUUGUAUUGUAAUU	22	0.000713192	0	0	0	0
Homo sapiens	hsa-miR-374a-5p	UUAUAAUACAACCUGAUAAGUG	22	0.259485	0	0	0	0
Homo sapiens	hsa-miR-374b-3p	CUUAGCAGGUUGUAUUAUCAUU	22	0.00424215	0	0	0	0
Homo sapiens	hsa-miR-374b-5p	AUAUAAUACAACCUGCUAAGUG	22	0.111369	0	0	0	0
Homo sapiens	hsa-miR-374c-3p	CACUUAGCAGGUUGUAUUAUAU	22	0.00252954	0	0	0	0
Homo sapiens	hsa-miR-374c-5p	AUAAUACAACCUGCUAAGUGCU	22	0.528208	0	0	0	0
Homo sapiens	hsa-miR-375-3p	UUUGUUCGUUCGGCUCGCGUGA	22	0.0231046	0	0	0	0
Homo sapiens	hsa-miR-375-5p	GCGACGAGCCCCUCGCACAAACC	23	0.00364657	0	0	0	0
Homo sapiens	hsa-miR-376a-2-5p	GGUAGAUUUUCCUUCUAUGGU	21	7.56038e-05	0	0	0	0
Homo sapiens	hsa-miR-376a-3p	AUCAUAGAGGAAAAUCCACGU	21	0.0519865	0	0	0	0
Homo sapiens	hsa-miR-376a-5p	GUAGAUUCUCCUUCUAUGAGUA	22	0.000492117	0	0	0	0
Homo sapiens	hsa-miR-376b-3p	AUCAUAGAGGAAAAUCCAUGUU	22	0.071778	0	0	0	0
Homo sapiens	hsa-miR-376b-5p	CGUGGAUAUUCCUUCUAUGUUU	22	0.00023458	0	0	0	0
Homo sapiens	hsa-miR-376c-3p	AACAUAGAGGAAAUUCCACGU	21	0.0294861	0	0	0	0
Homo sapiens	hsa-miR-376c-5p	GGUGGAUAUUCCUUCUAUGUU	21	0.000877587	0	0	0	0
Homo sapiens	hsa-miR-377-3p	AUCACACAAAGGCAACUUUUGU	22	0.00581864	0	0	0	0
Homo sapiens	hsa-miR-377-5p	AGAGGUUGCCCUUGGUGAAUUC	22	0.015728	0	0	0	0
Homo sapiens	hsa-miR-378a-3p	ACUGGACUUGGAGUCAGAAGGC	22	0.218743	0	0	0	0
Homo sapiens	hsa-miR-378a-5p	CUCCUGACUCCAGGUCCUGUGU	22	0.00782483	0	0	0	0
Homo sapiens	hsa-miR-378b	ACUGGACUUGGAGGCAGAA	19	0.312093	0	0	0	0
Homo sapiens	hsa-miR-378c	ACUGGACUUGGAGUCAGAAGAGUGG	25	0.0797976	0	0	0	0
Homo sapiens	hsa-miR-378d	ACUGGACUUGGAGUCAGAAA	20	0.084733	0	0	0	0
Homo sapiens	hsa-miR-378e	ACUGGACUUGGAGUCAGGA	19	0.489692	0	0	0	0
Homo sapiens	hsa-miR-378f	ACUGGACUUGGAGCCAGAAG	20	0.105569	0	0	0	0
Homo sapiens	hsa-miR-378g	ACUGGGCUUGGAGUCAGAAG	20	0.266418	0	0	0	0
Homo sapiens	hsa-miR-378h	ACUGGACUUGGUGUCAGAUGG	21	0.232454	0	0	0	0
Homo sapiens	hsa-miR-378i	ACUGGACUAGGAGUCAGAAGG	21	0.18678	0	0	0	0
Homo sapiens	hsa-miR-378j	ACUGGAUUUGGAGCCAGAA	19	0.00618223	0	0	0	0
Homo sapiens	hsa-miR-379-3p	UAUGUAACAUGGUCCACUAACU	22	0.0152559	0	0	0	0
Homo sapiens	hsa-miR-379-5p	UGGUAGACUAUGGAACGUAGG	21	0.0344217	0	0	0	0
Homo sapiens	hsa-miR-380-3p	UAUGUAAUAUGGUCCACAUCUU	22	0.00396442	0	0	0	0
Homo sapiens	hsa-miR-380-5p	UGGUUGACCAUAGAACAUGCGC	22	0.346775	0	0	0	0
Homo sapiens	hsa-miR-381-3p	UAUACAAGGGCAAGCUCUCUGU	22	0.118405	0	0	0	0
Homo sapiens	hsa-miR-381-5p	AGCGAGGUUGCCCUUUGUAUAU	22	0.00032705	0	0	0	0
Homo sapiens	hsa-miR-382-3p	AAUCAUUCACGGACAACACUU	21	0.119412	0	0	0	0
Homo sapiens	hsa-miR-382-5p	GAAGUUGUUCGUGGUGGAUUCG	22	0.383018	0	0	0	0
Homo sapiens	hsa-miR-383-3p	ACAGCACUGCCUGGUCAGA	19	0.0384039	0	0	0	0
Homo sapiens	hsa-miR-383-5p	AGAUCAGAAGGUGAUUGUGGCU	22	0.132451	0	0	0	0
Homo sapiens	hsa-miR-384	AUUCCUAGAAAUUGUUCAUA	20	0.00148993	0	0	0	0
Homo sapiens	hsa-miR-3907	AGGUGCUCCAGGCUGGCUCACA	22	0.13922	0	0	0	0
Homo sapiens	hsa-miR-3908	GAGCAAUGUAGGUAGACUGUUU	22	0.0344902	0	0	0	0
Homo sapiens	hsa-miR-3909	UGUCCUCUAGGGCCUGCAGUCU	22	0.0971417	0	0	0	0
Homo sapiens	hsa-miR-3910	AAAGGCAUAAAACCAAGACA	20	0.179721	0	0	0	0
Homo sapiens	hsa-miR-3911	UGUGUGGAUCCUGGAGGAGGCA	22	0.53217	1	GGAUCCUGGAGGAGG	6	15
Homo sapiens	hsa-miR-3912-3p	UAACGCAUAAUAUGGACAUGU	21	0.351617	0	0	0	0
Homo sapiens	hsa-miR-3912-5p	AUGUCCAUAUUAUGGGUUAGU	21	0.00777524	0	0	0	0
Homo sapiens	hsa-miR-3913-3p	AGACAUCAAGAUCAGUCCCAAA	22	0.00304977	0	0	0	0
Homo sapiens	hsa-miR-3913-5p	UUUGGGACUGAUCUUGAUGUCU	22	0.246533	0	0	0	0
Homo sapiens	hsa-miR-3914	AAGGAACCAGAAAAUGAGAAGU	22	0.0566004	0	0	0	0
Homo sapiens	hsa-miR-3915	UUGAGGAAAAGAUGGUCUUAUU	22	0.0149023	0	0	0	0
Homo sapiens	hsa-miR-3916	AAGAGGAAGAAAUGGCUGGUUCUCAG	26	0.0761464	0	0	0	0
Homo sapiens	hsa-miR-3917	GCUCGGACUGAGCAGGUGGG	20	0.615661	0	0	0	0
Homo sapiens	hsa-miR-3918	ACAGGGCCGCAGAUGGAGACU	21	0.204201	0	0	0	0
Homo sapiens	hsa-miR-3919	GCAGAGAACAAAGGACUCAGU	21	0.0380782	0	0	0	0
Homo sapiens	hsa-miR-3920	ACUGAUUAUCUUAACUCUCUGA	22	0.0298378	0	0	0	0
Homo sapiens	hsa-miR-3921	UCUCUGAGUACCAUAUGCCUUGU	23	0.0159288	0	0	0	0
Homo sapiens	hsa-miR-3922-3p	UCUGGCCUUGACUUGACUCUUU	22	0.0133642	0	0	0	0
Homo sapiens	hsa-miR-3922-5p	UCAAGGCCAGAGGUCCCACAGCA	23	0.00761698	0	0	0	0
Homo sapiens	hsa-miR-3923	AACUAGUAAUGUUGGAUUAGGG	22	0.770373	0	0	0	0
Homo sapiens	hsa-miR-3924	AUAUGUAUAUGUGACUGCUACU	22	0.00121379	0	0	0	0
Homo sapiens	hsa-miR-3925-3p	ACUCCAGUUUUAGUUCUCUUG	21	0.00102685	0	0	0	0
Homo sapiens	hsa-miR-3925-5p	AAGAGAACUGAAAGUGGAGCCU	22	0.0304056	0	0	0	0
Homo sapiens	hsa-miR-3926	UGGCCAAAAAGCAGGCAGAGA	21	0.0137314	0	0	0	0
Homo sapiens	hsa-miR-3927-3p	CAGGUAGAUAUUUGAUAGGCAU	22	0.0123214	0	0	0	0
Homo sapiens	hsa-miR-3927-5p	GCCUAUCACAUAUCUGCCUGU	21	0.00197877	0	0	0	0
Homo sapiens	hsa-miR-3928-3p	GGAGGAACCUUGGAGCUUCGGC	22	0.319643	1	GGAGGAACCUUGGAGCUUCGG	1	21
Homo sapiens	hsa-miR-3928-5p	UGAAGCUCUAAGGUUCCGCCUGC	23	0.0389356	0	0	0	0
Homo sapiens	hsa-miR-3929	GAGGCUGAUGUGAGUAGACCACU	23	0.198743	0	0	0	0
Homo sapiens	hsa-miR-3934-3p	UGCUCAGGUUGCACAGCUGGGA	22	0.588551	0	0	0	0
Homo sapiens	hsa-miR-3934-5p	UCAGGUGUGGAAACUGAGGCAG	22	0.404206	0	0	0	0
Homo sapiens	hsa-miR-3935	UGUAGAUACGAGCACCAGCCAC	22	0.0486084	0	0	0	0
Homo sapiens	hsa-miR-3936	UAAGGGGUGUAUGGCAGAUGCA	22	0.268266	0	0	0	0
Homo sapiens	hsa-miR-3937	ACAGGCGGCUGUAGCAAUGGGGG	23	0.915794	1	GGCGGCUGUAGCAAUGGGGG	4	20
Homo sapiens	hsa-miR-3938	AAUUCCCUUGUAGAUAACCCGG	22	0.0023253	0	0	0	0
Homo sapiens	hsa-miR-3939	UACGCGCAGACCACAGGAUGUC	22	0.355772	0	0	0	0
Homo sapiens	hsa-miR-3940-3p	CAGCCCGGAUCCCAGCCCACUU	22	0.00124961	0	0	0	0
Homo sapiens	hsa-miR-3940-5p	GUGGGUUGGGGCGGGCUCUG	20	0.983952	0	0	0	0
Homo sapiens	hsa-miR-3941	UUACACACAACUGAGGAUCAUA	22	0.571524	0	0	0	0
Homo sapiens	hsa-miR-3942-3p	UUUCAGAUAACAGUAUUACAU	21	0.00116269	0	0	0	0
Homo sapiens	hsa-miR-3942-5p	AAGCAAUACUGUUACCUGAAAU	22	0.316511	0	0	0	0
Homo sapiens	hsa-miR-3943	UAGCCCCCAGGCUUCACUUGGCG	23	0.00255061	0	0	0	0
Homo sapiens	hsa-miR-3944-3p	UUCGGGCUGGCCUGCUGCUCCGG	23	0.0854914	0	0	0	0
Homo sapiens	hsa-miR-3944-5p	UGUGCAGCAGGCCAACCGAGA	21	0.0487178	0	0	0	0
Homo sapiens	hsa-miR-3945	AGGGCAUAGGAGAGGGUUGAUAU	23	0.577526	0	0	0	0
Homo sapiens	hsa-miR-3960	GGCGGCGGCGGAGGCGGGGG	20	0.952441	1	GGCGGCGGCGGAGGCGGGGG	1	20
Homo sapiens	hsa-miR-3972	CUGCCAGCCCCGUUCCAGGGCA	22	0.00366439	0	0	0	0
Homo sapiens	hsa-miR-3973	ACAAAGUACAGCAUUAGCCUUAG	23	0.113928	0	0	0	0
Homo sapiens	hsa-miR-3974	AAAGGUCAUUGUAAGGUUAAUGC	23	0.548388	0	0	0	0
Homo sapiens	hsa-miR-3975	UGAGGCUAAUGCACUACUUCAC	22	0.0441003	0	0	0	0
Homo sapiens	hsa-miR-3976	UAUAGAGAGCAGGAAGAUUAAUGU	24	0.0103004	0	0	0	0
Homo sapiens	hsa-miR-3977	GUGCUUCAUCGUAAUUAACCUUA	23	0.18089	0	0	0	0
Homo sapiens	hsa-miR-3978	GUGGAAAGCAUGCAUCCAGGGUGU	24	0.424652	0	0	0	0
Homo sapiens	hsa-miR-409-3p	GAAUGUUGCUCGGUGAACCCCU	22	0.0369174	0	0	0	0
Homo sapiens	hsa-miR-409-5p	AGGUUACCCGAGCAACUUUGCAU	23	0.0111271	0	0	0	0
Homo sapiens	hsa-miR-410-3p	AAUAUAACACAGAUGGCCUGU	21	0.0424077	0	0	0	0
Homo sapiens	hsa-miR-410-5p	AGGUUGUCUGUGAUGAGUUCG	21	0.498091	0	0	0	0
Homo sapiens	hsa-miR-411-3p	UAUGUAACACGGUCCACUAACC	22	0.0168958	0	0	0	0
Homo sapiens	hsa-miR-411-5p	UAGUAGACCGUAUAGCGUACG	21	0.0211061	0	0	0	0
Homo sapiens	hsa-miR-412-3p	ACUUCACCUGGUCCACUAGCCGU	23	0.0117542	0	0	0	0
Homo sapiens	hsa-miR-412-5p	UGGUCGACCAGUUGGAAAGUAAU	23	0.346072	0	0	0	0
Homo sapiens	hsa-miR-421	AUCAACAGACAUUAAUUGGGCGC	23	0.181835	0	0	0	0
Homo sapiens	hsa-miR-422a	ACUGGACUUAGGGUCAGAAGGC	22	0.571988	0	0	0	0
Homo sapiens	hsa-miR-423-3p	AGCUCGGUCUGAGGCCCCUCAGU	23	0.00657872	0	0	0	0
Homo sapiens	hsa-miR-423-5p	UGAGGGGCAGAGAGCGAGACUUU	23	0.00500166	0	0	0	0
Homo sapiens	hsa-miR-424-3p	CAAAACGUGAGGCGCUGCUAU	21	0.0206788	0	0	0	0
Homo sapiens	hsa-miR-424-5p	CAGCAGCAAUUCAUGUUUUGAA	22	0.00133802	0	0	0	0
Homo sapiens	hsa-miR-425-3p	AUCGGGAAUGUCGUGUCCGCCC	22	0.0793548	0	0	0	0
Homo sapiens	hsa-miR-425-5p	AAUGACACGAUCACUCCCGUUGA	23	0.0220824	0	0	0	0
Homo sapiens	hsa-miR-4251	CCUGAGAAAAGGGCCAA	17	0.0691746	0	0	0	0
Homo sapiens	hsa-miR-4252	GGCCACUGAGUCAGCACCA	19	0.049952	0	0	0	0
Homo sapiens	hsa-miR-4253	AGGGCAUGUCCAGGGGGU	18	0.961971	0	0	0	0
Homo sapiens	hsa-miR-4254	GCCUGGAGCUACUCCACCAUCUC	23	0.0215355	0	0	0	0
Homo sapiens	hsa-miR-4255	CAGUGUUCAGAGAUGGA	17	0.0300238	0	0	0	0
Homo sapiens	hsa-miR-4256	AUCUGACCUGAUGAAGGU	18	0.561132	0	0	0	0
Homo sapiens	hsa-miR-4257	CCAGAGGUGGGGACUGAG	18	0.635157	0	0	0	0
Homo sapiens	hsa-miR-4258	CCCCGCCACCGCCUUGG	17	0.00200163	0	0	0	0
Homo sapiens	hsa-miR-4259	CAGUUGGGUCUAGGGGUCAGGA	22	0.940839	0	0	0	0
Homo sapiens	hsa-miR-4260	CUUGGGGCAUGGAGUCCCA	19	0.13891	0	0	0	0
Homo sapiens	hsa-miR-4261	AGGAAACAGGGACCCA	16	0.37127	0	0	0	0
Homo sapiens	hsa-miR-4262	GACAUUCAGACUACCUG	17	0.00518771	0	0	0	0
Homo sapiens	hsa-miR-4263	AUUCUAAGUGCCUUGGCC	18	0.0235199	0	0	0	0
Homo sapiens	hsa-miR-4264	ACUCAGUCAUGGUCAUU	17	0.0325628	0	0	0	0
Homo sapiens	hsa-miR-4265	CUGUGGGCUCAGCUCUGGG	19	0.553594	0	0	0	0
Homo sapiens	hsa-miR-4266	CUAGGAGGCCUUGGCC	16	0.193108	0	0	0	0
Homo sapiens	hsa-miR-4267	UCCAGCUCGGUGGCAC	16	0.0490716	0	0	0	0
Homo sapiens	hsa-miR-4268	GGCUCCUCCUCUCAGGAUGUG	21	0.0197781	0	0	0	0
Homo sapiens	hsa-miR-4269	GCAGGCACAGACAGCCCUGGC	21	0.0293118	0	0	0	0
Homo sapiens	hsa-miR-4270	UCAGGGAGUCAGGGGAGGGC	20	0.964446	0	0	0	0
Homo sapiens	hsa-miR-4271	GGGGGAAGAAAAGGUGGGG	19	0.97973	1	GGGGGAAGAAAAGGUGGGG	1	19
Homo sapiens	hsa-miR-4272	CAUUCAACUAGUGAUUGU	18	0.026909	0	0	0	0
Homo sapiens	hsa-miR-4273	GUGUUCUCUGAUGGACAG	18	0.420909	0	0	0	0
Homo sapiens	hsa-miR-4274	CAGCAGUCCCUCCCCCUG	18	0.000138219	0	0	0	0
Homo sapiens	hsa-miR-4275	CCAAUUACCACUUCUUU	17	0.00253722	0	0	0	0
Homo sapiens	hsa-miR-4276	CUCAGUGACUCAUGUGC	17	0.0670414	0	0	0	0
Homo sapiens	hsa-miR-4277	GCAGUUCUGAGCACAGUACAC	21	0.121452	0	0	0	0
Homo sapiens	hsa-miR-4278	CUAGGGGGUUUGCCCUUG	18	0.083802	0	0	0	0
Homo sapiens	hsa-miR-4279	CUCUCCUCCCGGCUUC	16	0.000363627	0	0	0	0
Homo sapiens	hsa-miR-4280	GAGUGUAGUUCUGAGCAGAGC	21	0.0363118	0	0	0	0
Homo sapiens	hsa-miR-4281	GGGUCCCGGGGAGGGGGG	18	0.973392	1	GGGUCCCGGGGAGGGGGG	1	18
Homo sapiens	hsa-miR-4282	UAAAAUUUGCAUCCAGGA	18	0.00393714	0	0	0	0
Homo sapiens	hsa-miR-4283	UGGGGCUCAGCGAGUUU	17	0.032517	0	0	0	0
Homo sapiens	hsa-miR-4284	GGGCUCACAUCACCCCAU	18	0.0123861	0	0	0	0
Homo sapiens	hsa-miR-4285	GCGGCGAGUCCGACUCAU	18	0.00686948	0	0	0	0
Homo sapiens	hsa-miR-4286	ACCCCACUCCUGGUACC	17	0.00141298	0	0	0	0
Homo sapiens	hsa-miR-4287	UCUCCCUUGAGGGCACUUU	19	0.00266705	0	0	0	0
Homo sapiens	hsa-miR-4288	UUGUCUGCUGAGUUUCC	17	0.00272308	0	0	0	0
Homo sapiens	hsa-miR-4289	GCAUUGUGCAGGGCUAUCA	19	0.0306754	0	0	0	0
Homo sapiens	hsa-miR-429	UAAUACUGUCUGGUAAAACCGU	22	0.336885	0	0	0	0
Homo sapiens	hsa-miR-4290	UGCCCUCCUUUCUUCCCUC	19	6.22026e-05	0	0	0	0
Homo sapiens	hsa-miR-4291	UUCAGCAGGAACAGCU	16	0.121464	0	0	0	0
Homo sapiens	hsa-miR-4292	CCCCUGGGCCGGCCUUGG	18	0.0095461	0	0	0	0
Homo sapiens	hsa-miR-4293	CAGCCUGACAGGAACAG	17	0.282513	0	0	0	0
Homo sapiens	hsa-miR-4294	GGGAGUCUACAGCAGGG	17	0.674798	0	0	0	0
Homo sapiens	hsa-miR-4295	CAGUGCAAUGUUUUCCUU	18	0.000546511	0	0	0	0
Homo sapiens	hsa-miR-4296	AUGUGGGCUCAGGCUCA	17	0.394249	0	0	0	0
Homo sapiens	hsa-miR-4297	UGCCUUCCUGUCUGUG	16	0.0139722	0	0	0	0
Homo sapiens	hsa-miR-4298	CUGGGACAGGAGGAGGAGGCAG	22	0.916668	1	GGGACAGGAGGAGGAGG	3	17
Homo sapiens	hsa-miR-4299	GCUGGUGACAUGAGAGGC	18	0.20643	0	0	0	0
Homo sapiens	hsa-miR-4300	UGGGAGCUGGACUACUUC	18	0.24833	0	0	0	0
Homo sapiens	hsa-miR-4301	UCCCACUACUUCACUUGUGA	20	0.00230006	0	0	0	0
Homo sapiens	hsa-miR-4302	CCAGUGUGGCUCAGCGAG	18	0.0644757	0	0	0	0
Homo sapiens	hsa-miR-4303	UUCUGAGCUGAGGACAG	17	0.148403	0	0	0	0
Homo sapiens	hsa-miR-4304	CCGGCAUGUCCAGGGCA	17	0.301063	0	0	0	0
Homo sapiens	hsa-miR-4305	CCUAGACACCUCCAGUUC	18	0.00519163	0	0	0	0
Homo sapiens	hsa-miR-4306	UGGAGAGAAAGGCAGUA	17	0.038151	0	0	0	0
Homo sapiens	hsa-miR-4307	AAUGUUUUUUCCUGUUUCC	19	1.93373e-05	0	0	0	0
Homo sapiens	hsa-miR-4308	UCCCUGGAGUUUCUUCUU	18	0.000569841	0	0	0	0
Homo sapiens	hsa-miR-4309	CUGGAGUCUAGGAUUCCA	18	0.0302166	0	0	0	0
Homo sapiens	hsa-miR-431-3p	CAGGUCGUCUUGCAGGGCUUCU	22	0.568875	0	0	0	0
Homo sapiens	hsa-miR-431-5p	UGUCUUGCAGGCCGUCAUGCA	21	0.196794	0	0	0	0
Homo sapiens	hsa-miR-4310	GCAGCAUUCAUGUCCC	16	0.00147956	0	0	0	0
Homo sapiens	hsa-miR-4311	GAAAGAGAGCUGAGUGUG	18	0.0166316	0	0	0	0
Homo sapiens	hsa-miR-4312	GGCCUUGUUCCUGUCCCCA	19	0.000717108	0	0	0	0
Homo sapiens	hsa-miR-4313	AGCCCCCUGGCCCCAAACCC	20	9.94176e-05	0	0	0	0
Homo sapiens	hsa-miR-4314	CUCUGGGAAAUGGGACAG	18	0.865287	0	0	0	0
Homo sapiens	hsa-miR-4315	CCGCUUUCUGAGCUGGAC	18	0.00901704	0	0	0	0
Homo sapiens	hsa-miR-4316	GGUGAGGCUAGCUGGUG	17	0.407682	0	0	0	0
Homo sapiens	hsa-miR-4317	ACAUUGCCAGGGAGUUU	17	0.0437391	0	0	0	0
Homo sapiens	hsa-miR-4318	CACUGUGGGUACAUGCU	17	0.747487	0	0	0	0
Homo sapiens	hsa-miR-4319	UCCCUGAGCAAAGCCAC	17	0.00197213	0	0	0	0
Homo sapiens	hsa-miR-432-3p	CUGGAUGGCUCCUCCAUGUCU	21	0.0418835	0	0	0	0
Homo sapiens	hsa-miR-432-5p	UCUUGGAGUAGGUCAUUGGGUGG	23	0.549043	1	GGAGUAGGUCAUUGGGUGG	5	19
Homo sapiens	hsa-miR-4320	GGGAUUCUGUAGCUUCCU	18	0.0387291	0	0	0	0
Homo sapiens	hsa-miR-4321	UUAGCGGUGGACCGCCCUGCG	21	0.096144	0	0	0	0
Homo sapiens	hsa-miR-4322	CUGUGGGCUCAGCGCGUGGGG	21	0.793752	0	0	0	0
Homo sapiens	hsa-miR-4323	CAGCCCCACAGCCUCAGA	18	0.000493783	0	0	0	0
Homo sapiens	hsa-miR-4324	CCCUGAGACCCUAACCUUAA	20	0.00373884	0	0	0	0
Homo sapiens	hsa-miR-4325	UUGCACUUGUCUCAGUGA	18	0.130096	0	0	0	0
Homo sapiens	hsa-miR-4326	UGUUCCUCUGUCUCCCAGAC	20	0.000957343	0	0	0	0
Homo sapiens	hsa-miR-4327	GGCUUGCAUGGGGGACUGG	19	0.965431	1	GGCUUGCAUGGGGGACUGG	1	19
Homo sapiens	hsa-miR-4328	CCAGUUUUCCCAGGAUU	17	0.000171154	0	0	0	0
Homo sapiens	hsa-miR-4329	CCUGAGACCCUAGUUCCAC	19	0.00154299	0	0	0	0
Homo sapiens	hsa-miR-433-3p	AUCAUGAUGGGCUCCUCGGUGU	22	0.239309	0	0	0	0
Homo sapiens	hsa-miR-433-5p	UACGGUGAGCCUGUCAUUAUUC	22	0.00515626	0	0	0	0
Homo sapiens	hsa-miR-4330	CCUCAGAUCAGAGCCUUGC	19	0.00477451	0	0	0	0
Homo sapiens	hsa-miR-4418	CACUGCAGGACUCAGCAG	18	0.202541	0	0	0	0
Homo sapiens	hsa-miR-4420	GUCACUGAUGUCUGUAGCUGAG	22	0.183791	0	0	0	0
Homo sapiens	hsa-miR-4421	ACCUGUCUGUGGAAAGGAGCUA	22	0.306301	0	0	0	0
Homo sapiens	hsa-miR-4422	AAAAGCAUCAGGAAGUACCCA	21	0.040948	0	0	0	0
Homo sapiens	hsa-miR-4423-3p	AUAGGCACCAAAAAGCAACAA	21	0.253102	0	0	0	0
Homo sapiens	hsa-miR-4423-5p	AGUUGCCUUUUUGUUCCCAUGC	22	0.000148916	0	0	0	0
Homo sapiens	hsa-miR-4424	AGAGUUAACUCAAAAUGGACUA	22	0.0518846	0	0	0	0
Homo sapiens	hsa-miR-4425	UGUUGGGAUUCAGCAGGACCAU	22	0.437699	0	0	0	0
Homo sapiens	hsa-miR-4426	GAAGAUGGACGUACUUU	17	0.0193664	0	0	0	0
Homo sapiens	hsa-miR-4427	UCUGAAUAGAGUCUGAAGAGU	21	0.0556722	0	0	0	0
Homo sapiens	hsa-miR-4428	CAAGGAGACGGGAACAUGGAGC	22	0.674277	0	0	0	0
Homo sapiens	hsa-miR-4429	AAAAGCUGGGCUGAGAGGCG	20	0.159195	0	0	0	0
Homo sapiens	hsa-miR-4430	AGGCUGGAGUGAGCGGAG	18	0.405247	0	0	0	0
Homo sapiens	hsa-miR-4431	GCGACUCUGAAAACUAGAAGGU	22	0.0368429	0	0	0	0
Homo sapiens	hsa-miR-4432	AAAGACUCUGCAAGAUGCCU	20	0.0292887	0	0	0	0
Homo sapiens	hsa-miR-4433a-3p	ACAGGAGUGGGGGUGGGACAU	21	0.99136	1	GGAGUGGGGGUGGG	4	14
Homo sapiens	hsa-miR-4433a-5p	CGUCCCACCCCCCACUCCUGU	21	0.000147785	0	0	0	0
Homo sapiens	hsa-miR-4433b-3p	CAGGAGUGGGGGGUGGGACGU	21	0.996615	1	GGAGUGGGGGGUGGG	3	15
Homo sapiens	hsa-miR-4433b-5p	AUGUCCCACCCCCACUCCUGU	21	0.00029018	0	0	0	0
Homo sapiens	hsa-miR-4434	AGGAGAAGUAAAGUAGAA	18	0.0756197	0	0	0	0
Homo sapiens	hsa-miR-4435	AUGGCCAGAGCUCACACAGAGG	22	0.0161292	0	0	0	0
Homo sapiens	hsa-miR-4436a	GCAGGACAGGCAGAAGUGGAU	21	0.620914	0	0	0	0
Homo sapiens	hsa-miR-4436b-3p	CAGGGCAGGAAGAAGUGGACAA	22	0.761734	0	0	0	0
Homo sapiens	hsa-miR-4436b-5p	GUCCACUUCUGCCUGCCCUGCC	22	0.00289767	0	0	0	0
Homo sapiens	hsa-miR-4437	UGGGCUCAGGGUACAAAGGUU	21	0.824183	0	0	0	0
Homo sapiens	hsa-miR-4438	CACAGGCUUAGAAAAGACAGU	21	0.0740162	0	0	0	0
Homo sapiens	hsa-miR-4439	GUGACUGAUACCUUGGAGGCAU	22	0.560985	0	0	0	0
Homo sapiens	hsa-miR-4440	UGUCGUGGGGCUUGCUGGCUUG	22	0.820472	0	0	0	0
Homo sapiens	hsa-miR-4441	ACAGGGAGGAGAUUGUA	17	0.483247	0	0	0	0
Homo sapiens	hsa-miR-4442	GCCGGACAAGAGGGAGG	17	0.539775	0	0	0	0
Homo sapiens	hsa-miR-4443	UUGGAGGCGUGGGUUUU	17	0.0214013	0	0	0	0
Homo sapiens	hsa-miR-4444	CUCGAGUUGGAAGAGGCG	18	0.123631	0	0	0	0
Homo sapiens	hsa-miR-4445-3p	CACGGCAAAAGAAACAAUCCA	21	0.0282954	0	0	0	0
Homo sapiens	hsa-miR-4445-5p	AGAUUGUUUCUUUUGCCGUGCA	22	0.000253079	0	0	0	0
Homo sapiens	hsa-miR-4446-3p	CAGGGCUGGCAGUGACAUGGGU	22	0.89471	0	0	0	0
Homo sapiens	hsa-miR-4446-5p	AUUUCCCUGCCAUUCCCUUGGC	22	8.4703e-05	0	0	0	0
Homo sapiens	hsa-miR-4447	GGUGGGGGCUGUUGUUU	17	0.844434	0	0	0	0
Homo sapiens	hsa-miR-4448	GGCUCCUUGGUCUAGGGGUA	20	0.421458	0	0	0	0
Homo sapiens	hsa-miR-4449	CGUCCCGGGGCUGCGCGAGGCA	22	0.0827044	0	0	0	0
Homo sapiens	hsa-miR-4450	UGGGGAUUUGGAGAAGUGGUGA	22	0.197985	0	0	0	0
Homo sapiens	hsa-miR-4451	UGGUAGAGCUGAGGACA	17	0.156023	0	0	0	0
Homo sapiens	hsa-miR-4452	UUGAAUUCUUGGCCUUAAGUGAU	23	0.161485	0	0	0	0
Homo sapiens	hsa-miR-4453	GAGCUUGGUCUGUAGCGGUU	20	0.313935	0	0	0	0
Homo sapiens	hsa-miR-4454	GGAUCCGAGUCACGGCACCA	20	0.068329	0	0	0	0
Homo sapiens	hsa-miR-4455	AGGGUGUGUGUGUUUUU	17	0.00369012	0	0	0	0
Homo sapiens	hsa-miR-4456	CCUGGUGGCUUCCUUUU	17	0.00037196	0	0	0	0
Homo sapiens	hsa-miR-4457	UCACAAGGUAUUGACUGGCGUA	22	0.0228019	0	0	0	0
Homo sapiens	hsa-miR-4458	AGAGGUAGGUGUGGAAGAA	19	0.275015	0	0	0	0
Homo sapiens	hsa-miR-4460	AUAGUGGUUGUGAAUUUACCUU	22	0.0786579	0	0	0	0
Homo sapiens	hsa-miR-4462	UGACACGGAGGGUGGCUUGGGAA	23	0.928861	1	GGAGGGUGGCUUGGG	7	15
Homo sapiens	hsa-miR-4463	GAGACUGGGGUGGGGCC	17	0.926221	0	0	0	0
Homo sapiens	hsa-miR-4464	AAGGUUUGGAUAGAUGCAAUA	21	0.25884	0	0	0	0
Homo sapiens	hsa-miR-4465	CUCAAGUAGUCUGACCAGGGGA	22	0.661291	0	0	0	0
Homo sapiens	hsa-miR-4466	GGGUGCGGGCCGGCGGGG	18	0.970407	1	GGGUGCGGGCCGGCGGGG	1	18
Homo sapiens	hsa-miR-4467	UGGCGGCGGUAGUUAUGGGCUU	22	0.234842	1	GGCGGCGGUAGUUAUGGG	2	18
Homo sapiens	hsa-miR-4468	AGAGCAGAAGGAUGAGAU	18	0.0312705	0	0	0	0
Homo sapiens	hsa-miR-4469	GCUCCCUCUAGGGUCGCUCGGA	22	0.0437194	0	0	0	0
Homo sapiens	hsa-miR-4470	UGGCAAACGUGGAAGCCGAGA	21	0.0701498	0	0	0	0
Homo sapiens	hsa-miR-4471	UGGGAACUUAGUAGAGGUUUAA	22	0.203567	0	0	0	0
Homo sapiens	hsa-miR-4472	GGUGGGGGGUGUUGUUUU	18	0.480129	0	0	0	0
Homo sapiens	hsa-miR-4473	CUAGUGCUCUCCGUUACAAGUA	22	0.0628331	0	0	0	0
Homo sapiens	hsa-miR-4474-3p	UUGUGGCUGGUCAUGAGGCUAA	22	0.369354	0	0	0	0
Homo sapiens	hsa-miR-4474-5p	UUAGUCUCAUGAUCAGACACA	21	0.103942	0	0	0	0
Homo sapiens	hsa-miR-4475	CAAGGGACCAAGCAUUCAUUAU	22	0.0308757	0	0	0	0
Homo sapiens	hsa-miR-4476	CAGGAAGGAUUUAGGGACAGGC	22	0.642076	1	GGAAGGAUUUAGGGACAGG	3	19
Homo sapiens	hsa-miR-4477a	CUAUUAAGGACAUUUGUGAUUC	22	0.0021729	0	0	0	0
Homo sapiens	hsa-miR-4477b	AUUAAGGACAUUUGUGAUUGAU	22	0.061151	0	0	0	0
Homo sapiens	hsa-miR-4478	GAGGCUGAGCUGAGGAG	17	0.300055	0	0	0	0
Homo sapiens	hsa-miR-4479	CGCGCGGCCGUGCUCGGAGCAG	22	0.170794	0	0	0	0
Homo sapiens	hsa-miR-448	UUGCAUAUGUAGGAUGUCCCAU	22	0.0145724	0	0	0	0
Homo sapiens	hsa-miR-4480	AGCCAAGUGGAAGUUACUUUA	21	0.05839	0	0	0	0
Homo sapiens	hsa-miR-4481	GGAGUGGGCUGGUGGUU	17	0.91928	1	GGAGUGGGCUGGUGG	1	15
Homo sapiens	hsa-miR-4482-3p	UUUCUAUUUCUCAGUGGGGCUC	22	0.000359056	0	0	0	0
Homo sapiens	hsa-miR-4482-5p	AACCCAGUGGGCUAUGGAAAUG	22	0.0178914	0	0	0	0
Homo sapiens	hsa-miR-4483	GGGGUGGUCUGUUGUUG	17	0.973279	0	0	0	0
Homo sapiens	hsa-miR-4484	AAAAGGCGGGAGAAGCCCCA	20	0.00702028	0	0	0	0
Homo sapiens	hsa-miR-4485-3p	UAACGGCCGCGGUACCCUAA	20	0.0478292	0	0	0	0
Homo sapiens	hsa-miR-4485-5p	ACCGCCUGCCCAGUGA	16	0.00965927	0	0	0	0
Homo sapiens	hsa-miR-4486	GCUGGGCGAGGCUGGCA	17	0.630559	0	0	0	0
Homo sapiens	hsa-miR-4487	AGAGCUGGCUGAAGGGCAG	19	0.345083	0	0	0	0
Homo sapiens	hsa-miR-4488	AGGGGGCGGGCUCCGGCG	18	0.920013	1	GGGGGCGGGCUCCGG	2	15
Homo sapiens	hsa-miR-4489	UGGGGCUAGUGAUGCAGGACG	21	0.914425	0	0	0	0
Homo sapiens	hsa-miR-4490	UCUGGUAAGAGAUUUGGGCAUA	22	0.0278592	0	0	0	0
Homo sapiens	hsa-miR-4491	AAUGUGGACUGGUGUGACCAAA	22	0.472005	0	0	0	0
Homo sapiens	hsa-miR-4492	GGGGCUGGGCGCGCGCC	17	0.9255	0	0	0	0
Homo sapiens	hsa-miR-4493	AGAAGGCCUUUCCAUCUCUGU	21	0.00206577	0	0	0	0
Homo sapiens	hsa-miR-4494	CCAGACUGUGGCUGACCAGAGG	22	0.0657169	0	0	0	0
Homo sapiens	hsa-miR-4495	AAUGUAAACAGGCUUUUUGCU	21	0.00104957	0	0	0	0
Homo sapiens	hsa-miR-4496	GAGGAAACUGAAGCUGAGAGGG	22	0.230286	0	0	0	0
Homo sapiens	hsa-miR-4497	CUCCGGGACGGCUGGGC	17	0.651534	0	0	0	0
Homo sapiens	hsa-miR-4498	UGGGCUGGCAGGGCAAGUGCUG	22	0.891517	0	0	0	0
Homo sapiens	hsa-miR-4499	AAGACUGAGAGGAGGGA	17	0.245486	0	0	0	0
Homo sapiens	hsa-miR-449a	UGGCAGUGUAUUGUUAGCUGGU	22	0.0636325	0	0	0	0
Homo sapiens	hsa-miR-449b-3p	CAGCCACAACUACCCUGCCACU	22	0.0119477	0	0	0	0
Homo sapiens	hsa-miR-449b-5p	AGGCAGUGUAUUGUUAGCUGGC	22	0.0741212	0	0	0	0
Homo sapiens	hsa-miR-449c-3p	UUGCUAGUUGCACUCCUCUCUGU	23	0.0482565	0	0	0	0
Homo sapiens	hsa-miR-449c-5p	UAGGCAGUGUAUUGCUAGCGGCUGU	25	0.0409365	0	0	0	0
Homo sapiens	hsa-miR-4500	UGAGGUAGUAGUUUCUU	17	0.0178868	0	0	0	0
Homo sapiens	hsa-miR-4501	UAUGUGACCUCGGAUGAAUCA	21	0.0408424	0	0	0	0
Homo sapiens	hsa-miR-4502	GCUGAUGAUGAUGGUGCUGAAG	22	0.621904	0	0	0	0
Homo sapiens	hsa-miR-4503	UUUAAGCAGGAAAUAGAAUUUA	22	0.00492095	0	0	0	0
Homo sapiens	hsa-miR-4504	UGUGACAAUAGAGAUGAACAUG	22	0.155179	0	0	0	0
Homo sapiens	hsa-miR-4505	AGGCUGGGCUGGGACGGA	18	0.979369	1	GGCUGGGCUGGGACGG	2	16
Homo sapiens	hsa-miR-4506	AAAUGGGUGGUCUGAGGCAA	20	0.681452	0	0	0	0
Homo sapiens	hsa-miR-4507	CUGGGUUGGGCUGGGCUGGG	20	0.987923	1	GGGUUGGGCUGGGCUGGG	3	18
Homo sapiens	hsa-miR-4508	GCGGGGCUGGGCGCGCG	17	0.956036	0	0	0	0
Homo sapiens	hsa-miR-4509	ACUAAAGGAUAUAGAAGGUUUU	22	0.00291227	0	0	0	0
Homo sapiens	hsa-miR-450a-1-3p	AUUGGGAACAUUUUGCAUGUAU	22	0.00120982	0	0	0	0
Homo sapiens	hsa-miR-450a-2-3p	AUUGGGGACAUUUUGCAUUCAU	22	0.00430999	0	0	0	0
Homo sapiens	hsa-miR-450a-5p	UUUUGCGAUGUGUUCCUAAUAU	22	0.000348811	0	0	0	0
Homo sapiens	hsa-miR-450b-3p	UUGGGAUCAUUUUGCAUCCAUA	22	0.00577302	0	0	0	0
Homo sapiens	hsa-miR-450b-5p	UUUUGCAAUAUGUUCCUGAAUA	22	0.000470329	0	0	0	0
Homo sapiens	hsa-miR-4510	UGAGGGAGUAGGAUGUAUGGUU	22	0.373758	0	0	0	0
Homo sapiens	hsa-miR-4511	GAAGAACUGUUGCAUUUGCCCU	22	0.00335194	0	0	0	0
Homo sapiens	hsa-miR-4512	CAGGGCCUCACUGUAUCGCCCA	22	0.00668122	0	0	0	0
Homo sapiens	hsa-miR-4513	AGACUGACGGCUGGAGGCCCAU	22	0.0644393	0	0	0	0
Homo sapiens	hsa-miR-4514	ACAGGCAGGAUUGGGGAA	18	0.954652	0	0	0	0
Homo sapiens	hsa-miR-4515	AGGACUGGACUCCCGGCAGCCC	22	0.00782699	0	0	0	0
Homo sapiens	hsa-miR-4516	GGGAGAAGGGUCGGGGC	17	0.976963	0	0	0	0
Homo sapiens	hsa-miR-4517	AAAUAUGAUGAAACUCACAGCUGAG	25	0.0172452	0	0	0	0
Homo sapiens	hsa-miR-4518	GCUCAGGGAUGAUAACUGUGCUGAGA	26	0.478945	0	0	0	0
Homo sapiens	hsa-miR-4519	CAGCAGUGCGCAGGGCUG	18	0.613217	0	0	0	0
Homo sapiens	hsa-miR-451a	AAACCGUUACCAUUACUGAGUU	22	0.192452	0	0	0	0
Homo sapiens	hsa-miR-451b	UAGCAAGAGAACCAUUACCAUU	22	0.0188225	0	0	0	0
Homo sapiens	hsa-miR-452-3p	CUCAUCUGCAAAGAAGUAAGUG	22	0.11752	0	0	0	0
Homo sapiens	hsa-miR-452-5p	AACUGUUUGCAGAGGAAACUGA	22	0.026631	0	0	0	0
Homo sapiens	hsa-miR-4520-2-3p	UUUGGACAGAAAACACGCAGGU	22	0.0332161	0	0	0	0
Homo sapiens	hsa-miR-4520-3p	UUGGACAGAAAACACGCAGGAA	22	0.283233	0	0	0	0
Homo sapiens	hsa-miR-4520-5p	CCUGCGUGUUUUCUGUCCAA	20	0.000893212	0	0	0	0
Homo sapiens	hsa-miR-4521	GCUAAGGAAGUCCUGUGCUCAG	22	0.109299	0	0	0	0
Homo sapiens	hsa-miR-4522	UGACUCUGCCUGUAGGCCGGU	21	0.168486	0	0	0	0
Homo sapiens	hsa-miR-4523	GACCGAGAGGGCCUCGGCUGU	21	0.102484	0	0	0	0
Homo sapiens	hsa-miR-4524a-3p	UGAGACAGGCUUAUGCUGCUAU	22	0.00231946	0	0	0	0
Homo sapiens	hsa-miR-4524a-5p	AUAGCAGCAUGAACCUGUCUCA	22	0.161379	0	0	0	0
Homo sapiens	hsa-miR-4524b-3p	GAGACAGGUUCAUGCUGCUA	20	0.0536699	0	0	0	0
Homo sapiens	hsa-miR-4524b-5p	AUAGCAGCAUAAGCCUGUCUC	21	0.251238	0	0	0	0
Homo sapiens	hsa-miR-4525	GGGGGGAUGUGCAUGCUGGUU	21	0.991187	0	0	0	0
Homo sapiens	hsa-miR-4526	GCUGACAGCAGGGCUGGCCGCU	22	0.535392	0	0	0	0
Homo sapiens	hsa-miR-4527	UGGUCUGCAAAGAGAUGACUGU	22	0.0667763	0	0	0	0
Homo sapiens	hsa-miR-4528	UCAUUAUAUGUAUGAUCUGGAC	22	0.00150481	0	0	0	0
Homo sapiens	hsa-miR-4529-3p	AUUGGACUGCUGAUGGCCCGU	21	0.0636893	0	0	0	0
Homo sapiens	hsa-miR-4529-5p	AGGCCAUCAGCAGUCCAAUGAA	22	0.0469322	0	0	0	0
Homo sapiens	hsa-miR-4530	CCCAGCAGGACGGGAGCG	18	0.234762	0	0	0	0
Homo sapiens	hsa-miR-4531	AUGGAGAAGGCUUCUGA	17	0.119158	0	0	0	0
Homo sapiens	hsa-miR-4533	UGGAAGGAGGUUGCCGGACGCU	22	0.822362	1	GGAAGGAGGUUGCCGG	2	16
Homo sapiens	hsa-miR-4534	GGAUGGAGGAGGGGUCU	17	0.986017	1	GGAUGGAGGAGGGG	1	14
Homo sapiens	hsa-miR-4535	GUGGACCUGGCUGGGAC	17	0.882927	0	0	0	0
Homo sapiens	hsa-miR-4536-3p	UCGUGCAUAUAUCUACCACAU	21	0.00576595	0	0	0	0
Homo sapiens	hsa-miR-4536-5p	UGUGGUAGAUAUAUGCACGAU	21	0.00845008	0	0	0	0
Homo sapiens	hsa-miR-4537	UGAGCCGAGCUGAGCUUAGCUG	22	0.0367182	0	0	0	0
Homo sapiens	hsa-miR-4538	GAGCUUGGAUGAGCUGGGCUGA	22	0.475715	0	0	0	0
Homo sapiens	hsa-miR-4539	GCUGAACUGGGCUGAGCUGGGC	22	0.681563	0	0	0	0
Homo sapiens	hsa-miR-454-3p	UAGUGCAAUAUUGCUUAUAGGGU	23	0.0423869	0	0	0	0
Homo sapiens	hsa-miR-454-5p	ACCCUAUCAAUAUUGUCUCUGC	22	0.00054571	0	0	0	0
Homo sapiens	hsa-miR-4540	UUAGUCCUGCCUGUAGGUUUA	21	0.024363	0	0	0	0
Homo sapiens	hsa-miR-455-3p	GCAGUCCAUGGGCAUAUACAC	21	0.0507517	0	0	0	0
Homo sapiens	hsa-miR-455-5p	UAUGUGCCUUUGGACUACAUCG	22	0.00389267	0	0	0	0
Homo sapiens	hsa-miR-4632-3p	UGCCGCCCUCUCGCUGCUCUAG	22	0.00989705	0	0	0	0
Homo sapiens	hsa-miR-4632-5p	GAGGGCAGCGUGGGUGUGGCGGA	23	0.872497	1	GGGCAGCGUGGGUGUGGCGG	3	20
Homo sapiens	hsa-miR-4633-3p	AGGAGCUAGCCAGGCAUAUGCA	22	0.0395416	0	0	0	0
Homo sapiens	hsa-miR-4633-5p	AUAUGCCUGGCUAGCUCCUC	20	0.00298432	0	0	0	0
Homo sapiens	hsa-miR-4634	CGGCGCGACCGGCCCGGGG	19	0.132407	0	0	0	0
Homo sapiens	hsa-miR-4635	UCUUGAAGUCAGAACCCGCAA	21	0.0179346	0	0	0	0
Homo sapiens	hsa-miR-4636	AACUCGUGUUCAAAGCCUUUAG	22	0.00994159	0	0	0	0
Homo sapiens	hsa-miR-4637	UACUAACUGCAGAUUCAAGUGA	22	0.0261967	0	0	0	0
Homo sapiens	hsa-miR-4638-3p	CCUGGACACCGCUCAGCCGGCCG	23	0.0879706	0	0	0	0
Homo sapiens	hsa-miR-4638-5p	ACUCGGCUGCGGUGGACAAGU	21	0.516674	0	0	0	0
Homo sapiens	hsa-miR-4639-3p	UCACUCUCACCUUGCUUUGC	20	0.00483358	0	0	0	0
Homo sapiens	hsa-miR-4639-5p	UUGCUAAGUAGGCUGAGAUUGA	22	0.116139	0	0	0	0
Homo sapiens	hsa-miR-4640-3p	CACCCCCUGUUUCCUGGCCCAC	22	0.000175298	0	0	0	0
Homo sapiens	hsa-miR-4640-5p	UGGGCCAGGGAGCAGCUGGUGGG	23	0.831107	1	GGGCCAGGGAGCAGCUGGUGGG	2	22
Homo sapiens	hsa-miR-4641	UGCCCAUGCCAUACUUUUGCCUCA	24	0.000482938	0	0	0	0
Homo sapiens	hsa-miR-4642	AUGGCAUCGUCCCCUGGUGGCU	22	0.0190048	0	0	0	0
Homo sapiens	hsa-miR-4643	GACACAUGACCAUAAAUGCUAA	22	0.356389	0	0	0	0
Homo sapiens	hsa-miR-4644	UGGAGAGAGAAAAGAGACAGAAG	23	0.00168152	0	0	0	0
Homo sapiens	hsa-miR-4645-3p	AGACAGUAGUUCUUGCCUGGUU	22	0.101384	0	0	0	0
Homo sapiens	hsa-miR-4645-5p	ACCAGGCAAGAAAUAUUGU	19	0.0091714	0	0	0	0
Homo sapiens	hsa-miR-4646-3p	AUUGUCCCUCUCCCUUCCCAG	21	0.000111294	0	0	0	0
Homo sapiens	hsa-miR-4646-5p	ACUGGGAAGAGGAGCUGAGGGA	22	0.718437	0	0	0	0
Homo sapiens	hsa-miR-4647	GAAGAUGGUGCUGUGCUGAGGAA	23	0.427848	0	0	0	0
Homo sapiens	hsa-miR-4648	UGUGGGACUGCAAAUGGGAG	20	0.858043	0	0	0	0
Homo sapiens	hsa-miR-4649-3p	UCUGAGGCCUGCCUCUCCCCA	21	0.00111965	0	0	0	0
Homo sapiens	hsa-miR-4649-5p	UGGGCGAGGGGUGGGCUCUCAGAG	24	0.644054	0	0	0	0
Homo sapiens	hsa-miR-4650-3p	AGGUAGAAUGAGGCCUGACAU	21	0.191738	0	0	0	0
Homo sapiens	hsa-miR-4650-5p	UCAGGCCUCUUUCUACCUU	19	0.00166067	0	0	0	0
Homo sapiens	hsa-miR-4651	CGGGGUGGGUGAGGUCGGGC	20	0.983355	1	GGGGUGGGUGAGGUCGGG	2	18
Homo sapiens	hsa-miR-4652-3p	GUUCUGUUAACCCAUCCCCUCA	22	0.0019307	0	0	0	0
Homo sapiens	hsa-miR-4652-5p	AGGGGACUGGUUAAUAGAACUA	22	0.857314	0	0	0	0
Homo sapiens	hsa-miR-4653-3p	UGGAGUUAAGGGUUGCUUGGAGA	23	0.778183	0	0	0	0
Homo sapiens	hsa-miR-4653-5p	UCUCUGAGCAAGGCUUAACACC	22	0.375546	0	0	0	0
Homo sapiens	hsa-miR-4654	UGUGGGAUCUGGAGGCAUCUGG	22	0.901191	1	GGGAUCUGGAGGCAUCUGG	4	19
Homo sapiens	hsa-miR-4655-3p	ACCCUCGUCAGGUCCCCGGGG	21	0.00667186	0	0	0	0
Homo sapiens	hsa-miR-4655-5p	CACCGGGGAUGGCAGAGGGUCG	22	0.892402	0	0	0	0
Homo sapiens	hsa-miR-4656	UGGGCUGAGGGCAGGAGGCCUGU	23	0.837776	1	GGGCUGAGGGCAGGAGG	2	17
Homo sapiens	hsa-miR-4657	AAUGUGGAAGUGGUCUGAGGCAU	23	0.65323	0	0	0	0
Homo sapiens	hsa-miR-4658	GUGAGUGUGGAUCCUGGAGGAAU	23	0.426479	0	0	0	0
Homo sapiens	hsa-miR-4659a-3p	UUUCUUCUUAGACAUGGCAACG	22	0.0139792	0	0	0	0
Homo sapiens	hsa-miR-4659a-5p	CUGCCAUGUCUAAGAAGAAAAC	22	0.0179461	0	0	0	0
Homo sapiens	hsa-miR-4659b-3p	UUUCUUCUUAGACAUGGCAGCU	22	0.00789868	0	0	0	0
Homo sapiens	hsa-miR-4659b-5p	UUGCCAUGUCUAAGAAGAA	19	0.0262276	0	0	0	0
Homo sapiens	hsa-miR-466	AUACACAUACACGCAACACACAU	23	0.650213	0	0	0	0
Homo sapiens	hsa-miR-4660	UGCAGCUCUGGUGGAAAAUGGAG	23	0.280548	0	0	0	0
Homo sapiens	hsa-miR-4661-3p	CAGGAUCCACAGAGCUAGUCCA	22	0.0125331	0	0	0	0
Homo sapiens	hsa-miR-4661-5p	AACUAGCUCUGUGGAUCCUGAC	22	0.100728	0	0	0	0
Homo sapiens	hsa-miR-4662a-3p	AAAGAUAGACAAUUGGCUAAAU	22	0.0455755	0	0	0	0
Homo sapiens	hsa-miR-4662a-5p	UUAGCCAAUUGUCCAUCUUUAG	22	0.00773105	0	0	0	0
Homo sapiens	hsa-miR-4662b	AAAGAUGGACAAUUGGCUAAAU	22	0.111257	0	0	0	0
Homo sapiens	hsa-miR-4663	AGCUGAGCUCCAUGGACGUGCAGU	24	0.0995202	0	0	0	0
Homo sapiens	hsa-miR-4664-3p	CUUCCGGUCUGUGAGCCCCGUC	22	0.00215512	0	0	0	0
Homo sapiens	hsa-miR-4664-5p	UGGGGUGCCCACUCCGCAAGUU	22	0.115067	0	0	0	0
Homo sapiens	hsa-miR-4665-3p	CUCGGCCGCGGCGCGUAGCCCCCGCC	26	0.00274459	0	0	0	0
Homo sapiens	hsa-miR-4665-5p	CUGGGGGACGCGUGAGCGCGAGC	23	0.669858	0	0	0	0
Homo sapiens	hsa-miR-4666a-3p	CAUACAAUCUGACAUGUAUUU	21	0.00463549	0	0	0	0
Homo sapiens	hsa-miR-4666a-5p	AUACAUGUCAGAUUGUAUGCC	21	0.00655695	0	0	0	0
Homo sapiens	hsa-miR-4666b	UUGCAUGUCAGAUUGUAAUUCCC	23	0.00335309	0	0	0	0
Homo sapiens	hsa-miR-4667-3p	UCCCUCCUUCUGUCCCCACAG	21	0.000206514	0	0	0	0
Homo sapiens	hsa-miR-4667-5p	ACUGGGGAGCAGAAGGAGAACC	22	0.396299	0	0	0	0
Homo sapiens	hsa-miR-4668-3p	GAAAAUCCUUUUUGUUUUUCCAG	23	1.33851e-05	0	0	0	0
Homo sapiens	hsa-miR-4668-5p	AGGGAAAAAAAAAAGGAUUUGUC	23	0.0238222	0	0	0	0
Homo sapiens	hsa-miR-4669	UGUGUCCGGGAAGUGGAGGAGG	22	0.633062	1	GGGAAGUGGAGGAGG	8	15
Homo sapiens	hsa-miR-4670-3p	UGAAGUUACAUCAUGGUCGCUU	22	0.460817	0	0	0	0
Homo sapiens	hsa-miR-4670-5p	AAGCGACCAUGAUGUAACUUCA	22	0.0832435	0	0	0	0
Homo sapiens	hsa-miR-4671-3p	UUAGUGCAUAGUCUUUGGUCU	21	0.136423	0	0	0	0
Homo sapiens	hsa-miR-4671-5p	ACCGAAGACUGUGCGCUAAUCU	22	0.100398	0	0	0	0
Homo sapiens	hsa-miR-4672	UUACACAGCUGGACAGAGGCA	21	0.241682	0	0	0	0
Homo sapiens	hsa-miR-4673	UCCAGGCAGGAGCCGGACUGGA	22	0.179841	1	GGCAGGAGCCGGACUGG	5	17
Homo sapiens	hsa-miR-4674	CUGGGCUCGGGACGCGCGGCU	21	0.868642	0	0	0	0
Homo sapiens	hsa-miR-4675	GGGGCUGUGAUUGACCAGCAGG	22	0.649131	0	0	0	0
Homo sapiens	hsa-miR-4676-3p	CACUGUUUCACCACUGGCUCUU	22	0.0151492	0	0	0	0
Homo sapiens	hsa-miR-4676-5p	GAGCCAGUGGUGAGACAGUGA	21	0.061648	0	0	0	0
Homo sapiens	hsa-miR-4677-3p	UCUGUGAGACCAAAGAACUACU	22	0.0194045	0	0	0	0
Homo sapiens	hsa-miR-4677-5p	UUGUUCUUUGGUCUUUCAGCCA	22	0.000993968	0	0	0	0
Homo sapiens	hsa-miR-4678	AAGGUAUUGUUCAGACUUAUGA	22	0.00148183	0	0	0	0
Homo sapiens	hsa-miR-4679	UCUGUGAUAGAGAUUCUUUGCU	22	0.00603826	0	0	0	0
Homo sapiens	hsa-miR-4680-3p	UCUGAAUUGUAAGAGUUGUUA	21	0.194931	0	0	0	0
Homo sapiens	hsa-miR-4680-5p	AGAACUCUUGCAGUCUUAGAUGU	23	0.0810886	0	0	0	0
Homo sapiens	hsa-miR-4681	AACGGGAAUGCAGGCUGUAUCU	22	0.292046	0	0	0	0
Homo sapiens	hsa-miR-4682	UCUGAGUUCCUGGAGCCUGGUCU	23	0.0426134	0	0	0	0
Homo sapiens	hsa-miR-4683	UGGAGAUCCAGUGCUCGCCCGAU	23	0.00880122	0	0	0	0
Homo sapiens	hsa-miR-4684-3p	UGUUGCAAGUCGGUGGAGACGU	22	0.410456	0	0	0	0
Homo sapiens	hsa-miR-4684-5p	CUCUCUACUGACUUGCAACAUA	22	0.136367	0	0	0	0
Homo sapiens	hsa-miR-4685-3p	UCUCCCUUCCUGCCCUGGCUAG	22	0.000551354	0	0	0	0
Homo sapiens	hsa-miR-4685-5p	CCCAGGGCUUGGAGUGGGGCAAGGUU	26	0.846164	1	GGGCUUGGAGUGGGGCAAGG	5	20
Homo sapiens	hsa-miR-4686	UAUCUGCUGGGCUUUCUGGUGUU	23	0.0185867	0	0	0	0
Homo sapiens	hsa-miR-4687-3p	UGGCUGUUGGAGGGGGCAGGC	21	0.978285	1	GGCUGUUGGAGGGGGCAGG	2	19
Homo sapiens	hsa-miR-4687-5p	CAGCCCUCCUCCCGCACCCAAA	22	0.000281719	0	0	0	0
Homo sapiens	hsa-miR-4688	UAGGGGCAGCAGAGGACCUGGG	22	0.837245	0	0	0	0
Homo sapiens	hsa-miR-4689	UUGAGGAGACAUGGUGGGGGCC	22	0.830888	1	GGAGACAUGGUGGGGG	5	16
Homo sapiens	hsa-miR-4690-3p	GCAGCCCAGCUGAGGCCUCUG	21	0.0161293	0	0	0	0
Homo sapiens	hsa-miR-4690-5p	GAGCAGGCGAGGCUGGGCUGAA	22	0.446878	0	0	0	0
Homo sapiens	hsa-miR-4691-3p	CCAGCCACGGACUGAGAGUGCAU	23	0.0834517	0	0	0	0
Homo sapiens	hsa-miR-4691-5p	GUCCUCCAGGCCAUGAGCUGCGG	23	0.0127016	0	0	0	0
Homo sapiens	hsa-miR-4692	UCAGGCAGUGUGGGUAUCAGAU	22	0.0452186	0	0	0	0
Homo sapiens	hsa-miR-4693-3p	UGAGAGUGGAAUUCACAGUAUUU	23	0.000524695	0	0	0	0
Homo sapiens	hsa-miR-4693-5p	AUACUGUGAAUUUCACUGUCACA	23	0.00837553	0	0	0	0
Homo sapiens	hsa-miR-4694-3p	CAAAUGGACAGGAUAACACCU	21	0.784063	0	0	0	0
Homo sapiens	hsa-miR-4694-5p	AGGUGUUAUCCUAUCCAUUUGC	22	0.000227626	0	0	0	0
Homo sapiens	hsa-miR-4695-3p	UGAUCUCACCGCUGCCUCCUUC	22	0.0151386	0	0	0	0
Homo sapiens	hsa-miR-4695-5p	CAGGAGGCAGUGGGCGAGCAGG	22	0.602196	1	GGAGGCAGUGGGCGAGCAGG	3	20
Homo sapiens	hsa-miR-4696	UGCAAGACGGAUACUGUCAUCU	22	0.366279	0	0	0	0
Homo sapiens	hsa-miR-4697-3p	UGUCAGUGACUCCUGCCCCUUGGU	24	0.00368088	0	0	0	0
Homo sapiens	hsa-miR-4697-5p	AGGGGGCGCAGUCACUGACGUG	22	0.884145	0	0	0	0
Homo sapiens	hsa-miR-4698	UCAAAAUGUAGAGGAAGACCCCA	23	0.00297632	0	0	0	0
Homo sapiens	hsa-miR-4699-3p	AAUUUACUCUGCAAUCUUCUCC	22	0.00273281	0	0	0	0
Homo sapiens	hsa-miR-4699-5p	AGAAGAUUGCAGAGUAAGUUCC	22	0.00541346	0	0	0	0
Homo sapiens	hsa-miR-4700-3p	CACAGGACUGACUCCUCACCCCAGUG	26	0.00824762	0	0	0	0
Homo sapiens	hsa-miR-4700-5p	UCUGGGGAUGAGGACAGUGUGU	22	0.919974	0	0	0	0
Homo sapiens	hsa-miR-4701-3p	AUGGGUGAUGGGUGUGGUGU	20	0.957882	0	0	0	0
Homo sapiens	hsa-miR-4701-5p	UUGGCCACCACACCUACCCCUU	22	0.00541778	0	0	0	0
Homo sapiens	hsa-miR-4703-3p	UGUAGUUGUAUUGUAUUGCCAC	22	0.00198034	0	0	0	0
Homo sapiens	hsa-miR-4703-5p	UAGCAAUACAGUACAAAUAUAGU	23	0.0705957	0	0	0	0
Homo sapiens	hsa-miR-4704-3p	UCAGUCACAUAUCUAGUGUCUA	22	0.0118966	0	0	0	0
Homo sapiens	hsa-miR-4704-5p	GACACUAGGCAUGUGAGUGAUU	22	0.272533	0	0	0	0
Homo sapiens	hsa-miR-4705	UCAAUCACUUGGUAAUUGCUGU	22	0.141212	0	0	0	0
Homo sapiens	hsa-miR-4706	AGCGGGGAGGAAGUGGGCGCUGCUU	25	0.906404	0	0	0	0
Homo sapiens	hsa-miR-4707-3p	AGCCCGCCCCAGCCGAGGUUCU	22	0.00095162	0	0	0	0
Homo sapiens	hsa-miR-4707-5p	GCCCCGGCGCGGGCGGGUUCUGG	23	0.0732873	1	GGCGCGGGCGGGUUCUGG	6	18
Homo sapiens	hsa-miR-4708-3p	AGCAAGGCGGCAUCUCUCUGAU	22	0.402598	0	0	0	0
Homo sapiens	hsa-miR-4708-5p	AGAGAUGCCGCCUUGCUCCUU	21	0.00347915	0	0	0	0
Homo sapiens	hsa-miR-4709-3p	UUGAAGAGGAGGUGCUCUGUAGC	23	0.235321	0	0	0	0
Homo sapiens	hsa-miR-4709-5p	ACAACAGUGACUUGCUCUCCAA	22	0.0630415	0	0	0	0
Homo sapiens	hsa-miR-4710	GGGUGAGGGCAGGUGGUU	18	0.971451	1	GGGUGAGGGCAGGUGG	1	16
Homo sapiens	hsa-miR-4711-3p	CGUGUCUUCUGGCUUGAU	18	0.248078	0	0	0	0
Homo sapiens	hsa-miR-4711-5p	UGCAUCAGGCCAGAAGACAUGAG	23	0.0498711	0	0	0	0
Homo sapiens	hsa-miR-4712-3p	AAUGAGAGACCUGUACUGUAU	21	0.00347822	0	0	0	0
Homo sapiens	hsa-miR-4712-5p	UCCAGUACAGGUCUCUCAUUUC	22	0.00196344	0	0	0	0
Homo sapiens	hsa-miR-4713-3p	UGGGAUCCAGACAGUGGGAGAA	22	0.2058	0	0	0	0
Homo sapiens	hsa-miR-4713-5p	UUCUCCCACUACCAGGCUCCCA	22	0.000560497	0	0	0	0
Homo sapiens	hsa-miR-4714-3p	CCAACCUAGGUGGUCAGAGUUG	22	0.126724	0	0	0	0
Homo sapiens	hsa-miR-4714-5p	AACUCUGACCCCUUAGGUUGAU	22	0.0549212	0	0	0	0
Homo sapiens	hsa-miR-4715-3p	GUGCCACCUUAACUGCAGCCAAU	23	0.129887	0	0	0	0
Homo sapiens	hsa-miR-4715-5p	AAGUUGGCUGCAGUUAAGGUGG	22	0.827109	0	0	0	0
Homo sapiens	hsa-miR-4716-3p	AAGGGGGAAGGAAACAUGGAGA	22	0.941034	1	GGGGGAAGGAAACAUGG	3	17
Homo sapiens	hsa-miR-4716-5p	UCCAUGUUUCCUUCCCCCUUCU	22	9.01184e-05	0	0	0	0
Homo sapiens	hsa-miR-4717-3p	ACACAUGGGUGGCUGUGGCCU	21	0.749505	0	0	0	0
Homo sapiens	hsa-miR-4717-5p	UAGGCCACAGCCACCCAUGUGU	22	0.0549865	0	0	0	0
Homo sapiens	hsa-miR-4718	AGCUGUACCUGAAACCAAGCA	21	0.109182	0	0	0	0
Homo sapiens	hsa-miR-4719	UCACAAAUCUAUAAUAUGCAGG	22	0.00543783	0	0	0	0
Homo sapiens	hsa-miR-4720-3p	UGCUUAAGUUGUACCAAGUAU	21	0.0623877	0	0	0	0
Homo sapiens	hsa-miR-4720-5p	CCUGGCAUAUUUGGUAUAACUU	22	0.00136461	0	0	0	0
Homo sapiens	hsa-miR-4721	UGAGGGCUCCAGGUGACGGUGG	22	0.450146	1	GGGCUCCAGGUGACGGUGG	4	19
Homo sapiens	hsa-miR-4722-3p	ACCUGCCAGCACCUCCCUGCAG	22	0.00733206	0	0	0	0
Homo sapiens	hsa-miR-4722-5p	GGCAGGAGGGCUGUGCCAGGUUG	23	0.815744	1	GGCAGGAGGGCUGUGCCAGG	1	20
Homo sapiens	hsa-miR-4723-3p	CCCUCUCUGGCUCCUCCCCAAA	22	0.000248776	0	0	0	0
Homo sapiens	hsa-miR-4723-5p	UGGGGGAGCCAUGAGAUAAGAGCA	24	0.386122	0	0	0	0
Homo sapiens	hsa-miR-4724-3p	GUACCUUCUGGUUCAGCUAGU	21	0.0328936	0	0	0	0
Homo sapiens	hsa-miR-4724-5p	AACUGAACCAGGAGUGAGCUUCG	23	0.157555	0	0	0	0
Homo sapiens	hsa-miR-4725-3p	UGGGGAAGGCGUCAGUGUCGGG	22	0.917988	0	0	0	0
Homo sapiens	hsa-miR-4725-5p	AGACCCUGCAGCCUUCCCACC	21	0.000752859	0	0	0	0
Homo sapiens	hsa-miR-4726-3p	ACCCAGGUUCCCUCUGGCCGCA	22	0.0035923	0	0	0	0
Homo sapiens	hsa-miR-4726-5p	AGGGCCAGAGGAGCCUGGAGUGG	23	0.212949	1	GGGCCAGAGGAGCCUGGAGUGG	2	22
Homo sapiens	hsa-miR-4727-3p	AUAGUGGGAAGCUGGCAGAUUC	22	0.328626	0	0	0	0
Homo sapiens	hsa-miR-4727-5p	AUCUGCCAGCUUCCACAGUGG	21	0.0230907	0	0	0	0
Homo sapiens	hsa-miR-4728-3p	CAUGCUGACCUCCCUCCUGCCCCAG	25	0.000666655	0	0	0	0
Homo sapiens	hsa-miR-4728-5p	UGGGAGGGGAGAGGCAGCAAGCA	23	0.780321	0	0	0	0
Homo sapiens	hsa-miR-4729	UCAUUUAUCUGUUGGGAAGCUA	22	0.00747484	0	0	0	0
Homo sapiens	hsa-miR-4730	CUGGCGGAGCCCAUUCCAUGCCA	23	0.00359961	0	0	0	0
Homo sapiens	hsa-miR-4731-3p	CACACAAGUGGCCCCCAACACU	22	0.00742916	0	0	0	0
Homo sapiens	hsa-miR-4731-5p	UGCUGGGGGCCACAUGAGUGUG	22	0.841715	0	0	0	0
Homo sapiens	hsa-miR-4732-3p	GCCCUGACCUGUCCUGUUCUG	21	0.00999223	0	0	0	0
Homo sapiens	hsa-miR-4732-5p	UGUAGAGCAGGGAGCAGGAAGCU	23	0.369688	0	0	0	0
Homo sapiens	hsa-miR-4733-3p	CCACCAGGUCUAGCAUUGGGAU	22	0.430074	0	0	0	0
Homo sapiens	hsa-miR-4733-5p	AAUCCCAAUGCUAGACCCGGUG	22	0.00278893	0	0	0	0
Homo sapiens	hsa-miR-4734	GCUGCGGGCUGCGGUCAGGGCG	22	0.747677	0	0	0	0
Homo sapiens	hsa-miR-4735-3p	AAAGGUGCUCAAAUUAGACAU	21	0.0772263	0	0	0	0
Homo sapiens	hsa-miR-4735-5p	CCUAAUUUGAACACCUUCGGUA	22	0.00763127	0	0	0	0
Homo sapiens	hsa-miR-4736	AGGCAGGUUAUCUGGGCUG	19	0.414623	0	0	0	0
Homo sapiens	hsa-miR-4737	AUGCGAGGAUGCUGACAGUG	20	0.397043	0	0	0	0
Homo sapiens	hsa-miR-4738-3p	UGAAACUGGAGCGCCUGGAGGA	22	0.257758	0	0	0	0
Homo sapiens	hsa-miR-4738-5p	ACCAGCGCGUUUUCAGUUUCAU	22	0.00028828	0	0	0	0
Homo sapiens	hsa-miR-4739	AAGGGAGGAGGAGCGGAGGGGCCCU	25	0.806785	1	GGGAGGAGGAGCGGAGGGG	3	19
Homo sapiens	hsa-miR-4740-3p	GCCCGAGAGGAUCCGUCCCUGC	22	0.000946577	0	0	0	0
Homo sapiens	hsa-miR-4740-5p	AGGACUGAUCCUCUCGGGCAGG	22	0.392554	0	0	0	0
Homo sapiens	hsa-miR-4741	CGGGCUGUCCGGAGGGGUCGGCU	23	0.810094	1	GGGCUGUCCGGAGGGGUCGG	2	20
Homo sapiens	hsa-miR-4742-3p	UCUGUAUUCUCCUUUGCCUGCAG	23	0.000410478	0	0	0	0
Homo sapiens	hsa-miR-4742-5p	UCAGGCAAAGGGAUAUUUACAGA	23	0.00822138	0	0	0	0
Homo sapiens	hsa-miR-4743-3p	UUUCUGUCUUUUCUGGUCCAG	21	0.00016177	0	0	0	0
Homo sapiens	hsa-miR-4743-5p	UGGCCGGAUGGGACAGGAGGCAU	23	0.880093	1	GGCCGGAUGGGACAGGAGG	2	19
Homo sapiens	hsa-miR-4744	UCUAAAGACUAGACUUCGCUAUG	23	0.00118422	0	0	0	0
Homo sapiens	hsa-miR-4745-3p	UGGCCCGGCGACGUCUCACGGUC	23	0.0483944	0	0	0	0
Homo sapiens	hsa-miR-4745-5p	UGAGUGGGGCUCCCGGGACGGCG	23	0.37446	0	0	0	0
Homo sapiens	hsa-miR-4746-3p	AGCGGUGCUCCUGCGGGCCGA	21	0.0542075	0	0	0	0
Homo sapiens	hsa-miR-4746-5p	CCGGUCCCAGGAGAACCUGCAGA	23	0.00790265	0	0	0	0
Homo sapiens	hsa-miR-4747-3p	AAGGCCCGGGCUUUCCUCCCAG	22	0.000485148	0	0	0	0
Homo sapiens	hsa-miR-4747-5p	AGGGAAGGAGGCUUGGUCUUAG	22	0.919104	1	GGGAAGGAGGCUUGG	2	15
Homo sapiens	hsa-miR-4748	GAGGUUUGGGGAGGAUUUGCU	21	0.0941752	0	0	0	0
Homo sapiens	hsa-miR-4749-3p	CGCCCCUCCUGCCCCCACAG	20	9.97231e-05	0	0	0	0
Homo sapiens	hsa-miR-4749-5p	UGCGGGGACAGGCCAGGGCAUC	22	0.945147	0	0	0	0
Homo sapiens	hsa-miR-4750-3p	CCUGACCCACCCCCUCCCGCAG	22	0.000252563	0	0	0	0
Homo sapiens	hsa-miR-4750-5p	CUCGGGCGGAGGUGGUUGAGUG	22	0.749313	1	GGGCGGAGGUGG	4	12
Homo sapiens	hsa-miR-4751	AGAGGACCCGUAGCUGCUAGAAGG	24	0.025944	0	0	0	0
Homo sapiens	hsa-miR-4752	UUGUGGAUCUCAAGGAUGUGCU	22	0.740253	0	0	0	0
Homo sapiens	hsa-miR-4753-3p	UUCUCUUUCUUUAGCCUUGUGU	22	0.00126825	0	0	0	0
Homo sapiens	hsa-miR-4753-5p	CAAGGCCAAAGGAAGAGAACAG	22	0.104934	0	0	0	0
Homo sapiens	hsa-miR-4754	AUGCGGACCUGGGUUAGCGGAGU	23	0.738785	0	0	0	0
Homo sapiens	hsa-miR-4755-3p	AGCCAGGCUCUGAAGGGAAAGU	22	0.456787	0	0	0	0
Homo sapiens	hsa-miR-4755-5p	UUUCCCUUCAGAGCCUGGCUUU	22	8.61906e-05	0	0	0	0
Homo sapiens	hsa-miR-4756-3p	CCAGAGAUGGUUGCCUUCCUAU	22	0.000708282	0	0	0	0
Homo sapiens	hsa-miR-4756-5p	CAGGGAGGCGCUCACUCUCUGCU	23	0.433343	0	0	0	0
Homo sapiens	hsa-miR-4757-3p	CAUGACGUCACAGAGGCUUCGC	22	0.0871897	0	0	0	0
Homo sapiens	hsa-miR-4757-5p	AGGCCUCUGUGACGUCACGGUGU	23	0.368248	0	0	0	0
Homo sapiens	hsa-miR-4758-3p	UGCCCCACCUGCUGACCACCCUC	23	0.00278539	0	0	0	0
Homo sapiens	hsa-miR-4758-5p	GUGAGUGGGAGCCGGUGGGGCUG	23	0.84449	0	0	0	0
Homo sapiens	hsa-miR-4759	UAGGACUAGAUGUUGGAAUUA	21	0.386659	0	0	0	0
Homo sapiens	hsa-miR-4760-3p	AAAUUCAUGUUCAAUCUAAACC	22	0.0180991	0	0	0	0
Homo sapiens	hsa-miR-4760-5p	UUUAGAUUGAACAUGAAGUUAG	22	0.0485385	0	0	0	0
Homo sapiens	hsa-miR-4761-3p	GAGGGCAUGCGCACUUUGUCC	21	0.0337867	0	0	0	0
Homo sapiens	hsa-miR-4761-5p	ACAAGGUGUGCAUGCCUGACC	21	0.475242	0	0	0	0
Homo sapiens	hsa-miR-4762-3p	CUUCUGAUCAAGAUUUGUGGUG	22	0.0117718	0	0	0	0
Homo sapiens	hsa-miR-4762-5p	CCAAAUCUUGAUCAGAAGCCU	21	0.0445494	0	0	0	0
Homo sapiens	hsa-miR-4763-3p	AGGCAGGGGCUGGUGCUGGGCGGG	24	0.975669	1	GGCAGGGGCUGGUGCUGGGCGGG	2	23
Homo sapiens	hsa-miR-4763-5p	CGCCUGCCCAGCCCUCCUGCU	21	0.000943328	0	0	0	0
Homo sapiens	hsa-miR-4764-3p	UUAACUCCUUUCACACCCAUGG	22	0.00156095	0	0	0	0
Homo sapiens	hsa-miR-4764-5p	UGGAUGUGGAAGGAGUUAUCU	21	0.408283	0	0	0	0
Homo sapiens	hsa-miR-4765	UGAGUGAUUGAUAGCUAUGUUC	22	0.0192857	0	0	0	0
Homo sapiens	hsa-miR-4766-3p	AUAGCAAUUGCUCUUUUGGAA	21	0.00363433	0	0	0	0
Homo sapiens	hsa-miR-4766-5p	UCUGAAAGAGCAGUUGGUGUU	21	0.163553	0	0	0	0
Homo sapiens	hsa-miR-4767	CGCGGGCGCUCCUGGCCGCCGCC	23	0.0520863	0	0	0	0
Homo sapiens	hsa-miR-4768-3p	CCAGGAGAUCCAGAGAGAAU	20	0.00308473	0	0	0	0
Homo sapiens	hsa-miR-4768-5p	AUUCUCUCUGGAUCCCAUGGAU	22	0.0214582	0	0	0	0
Homo sapiens	hsa-miR-4769-3p	UCUGCCAUCCUCCCUCCCCUAC	22	0.00013356	0	0	0	0
Homo sapiens	hsa-miR-4769-5p	GGUGGGAUGGAGAGAAGGUAUGAG	24	0.0655008	1	GGUGGGAUGGAGAGAAGG	1	18
Homo sapiens	hsa-miR-4770	UGAGAUGACACUGUAGCU	18	0.107877	0	0	0	0
Homo sapiens	hsa-miR-4771	AGCAGACUUGACCUACAAUUA	21	0.02726	0	0	0	0
Homo sapiens	hsa-miR-4772-3p	CCUGCAACUUUGCCUGAUCAGA	22	0.00811607	0	0	0	0
Homo sapiens	hsa-miR-4772-5p	UGAUCAGGCAAAAUUGCAGACU	22	0.0626411	0	0	0	0
Homo sapiens	hsa-miR-4773	CAGAACAGGAGCAUAGAAAGGC	22	0.164215	0	0	0	0
Homo sapiens	hsa-miR-4774-3p	AUUGCCUAACAUGUGCCAGAA	21	0.0247887	0	0	0	0
Homo sapiens	hsa-miR-4774-5p	UCUGGUAUGUAGUAGGUAAUAA	22	0.162087	0	0	0	0
Homo sapiens	hsa-miR-4775	UUAAUUUUUUGUUUCGGUCACU	22	7.11125e-05	0	0	0	0
Homo sapiens	hsa-miR-4776-3p	CUUGCCAUCCUGGUCCACUGCAU	23	0.0228962	0	0	0	0
Homo sapiens	hsa-miR-4776-5p	GUGGACCAGGAUGGCAAGGGCU	22	0.924194	1	GGACCAGGAUGGCAAGGG	3	18
Homo sapiens	hsa-miR-4777-3p	AUACCUCAUCUAGAAUGCUGUA	22	0.0715593	0	0	0	0
Homo sapiens	hsa-miR-4777-5p	UUCUAGAUGAGAGAUAUAUAUA	22	0.000215913	0	0	0	0
Homo sapiens	hsa-miR-4778-3p	UCUUCUUCCUUUGCAGAGUUGA	22	0.00129505	0	0	0	0
Homo sapiens	hsa-miR-4778-5p	AAUUCUGUAAAGGAAGAAGAGG	22	0.0562005	0	0	0	0
Homo sapiens	hsa-miR-4779	UAGGAGGGAAUAGUAAAAGCAG	22	0.767524	0	0	0	0
Homo sapiens	hsa-miR-4780	ACCCUUGAGCCUGAUCCCUAGC	22	0.00223573	0	0	0	0
Homo sapiens	hsa-miR-4781-3p	AAUGUUGGAAUCCUCGCUAGAG	22	0.0496947	0	0	0	0
Homo sapiens	hsa-miR-4781-5p	UAGCGGGGAUUCCAAUAUUGG	21	0.020815	0	0	0	0
Homo sapiens	hsa-miR-4782-3p	UGAUUGUCUUCAUAUCUAGAAC	22	0.00472	0	0	0	0
Homo sapiens	hsa-miR-4782-5p	UUCUGGAUAUGAAGACAAUCAA	22	0.0233859	0	0	0	0
Homo sapiens	hsa-miR-4783-3p	CCCCGGUGUUGGGGCGCGUCUGC	23	0.191951	0	0	0	0
Homo sapiens	hsa-miR-4783-5p	GGCGCGCCCAGCUCCCGGGCU	21	0.00543516	0	0	0	0
Homo sapiens	hsa-miR-4784	UGAGGAGAUGCUGGGACUGA	20	0.502483	0	0	0	0
Homo sapiens	hsa-miR-4785	AGAGUCGGCGACGCCGCCAGC	21	0.0220326	0	0	0	0
Homo sapiens	hsa-miR-4786-3p	UGAAGCCAGCUCUGGUCUGGGC	22	0.266976	0	0	0	0
Homo sapiens	hsa-miR-4786-5p	UGAGACCAGGACUGGAUGCACC	22	0.32541	0	0	0	0
Homo sapiens	hsa-miR-4787-3p	GAUGCGCCGCCCACUGCCCCGCGC	24	0.00281164	0	0	0	0
Homo sapiens	hsa-miR-4787-5p	GCGGGGGUGGCGGCGGCAUCCC	22	0.510782	1	GGGGGUGGCGGCGG	3	14
Homo sapiens	hsa-miR-4788	UUACGGACCAGCUAAGGGAGGC	22	0.753974	0	0	0	0
Homo sapiens	hsa-miR-4789-3p	CACACAUAGCAGGUGUAUAUA	21	0.0266946	0	0	0	0
Homo sapiens	hsa-miR-4789-5p	GUAUACACCUGAUAUGUGUAUG	22	0.00246119	0	0	0	0
Homo sapiens	hsa-miR-4790-3p	UGAAUGGUAAAGCGAUGUCACA	22	0.154771	0	0	0	0
Homo sapiens	hsa-miR-4790-5p	AUCGCUUUACCAUUCAUGUU	20	0.0102116	0	0	0	0
Homo sapiens	hsa-miR-4791	UGGAUAUGAUGACUGAAA	18	0.056675	0	0	0	0
Homo sapiens	hsa-miR-4793-3p	UCUGCACUGUGAGUUGGCUGGCU	23	0.466964	0	0	0	0
Homo sapiens	hsa-miR-4793-5p	ACAUCCUGCUCCACAGGGCAGAGG	24	0.0493462	0	0	0	0
Homo sapiens	hsa-miR-4794	UCUGGCUAUCUCACGAGACUGU	22	0.00453433	0	0	0	0
Homo sapiens	hsa-miR-4795-3p	AUAUUAUUAGCCACUUCUGGAU	22	0.00269692	0	0	0	0
Homo sapiens	hsa-miR-4795-5p	AGAAGUGGCUAAUAAUAUUGA	21	0.0221188	0	0	0	0
Homo sapiens	hsa-miR-4796-3p	UAAAGUGGCAGAGUAUAGACAC	22	0.0116926	0	0	0	0
Homo sapiens	hsa-miR-4796-5p	UGUCUAUACUCUGUCACUUUAC	22	0.00182106	0	0	0	0
Homo sapiens	hsa-miR-4797-3p	UCUCAGUAAGUGGCACUCUGU	21	0.202904	0	0	0	0
Homo sapiens	hsa-miR-4797-5p	GACAGAGUGCCACUUACUGAA	21	0.0562987	0	0	0	0
Homo sapiens	hsa-miR-4798-3p	AACUCACGAAGUAUACCGAAGU	22	0.0126523	0	0	0	0
Homo sapiens	hsa-miR-4798-5p	UUCGGUAUACUUUGUGAAUUGG	22	0.00230189	0	0	0	0
Homo sapiens	hsa-miR-4799-3p	ACUGGCAUGCUGCAUUUAUAUA	22	0.00147477	0	0	0	0
Homo sapiens	hsa-miR-4799-5p	AUCUAAAUGCAGCAUGCCAGUC	22	0.103066	0	0	0	0
Homo sapiens	hsa-miR-4800-3p	CAUCCGUCCGUCUGUCCAC	19	0.00627448	0	0	0	0
Homo sapiens	hsa-miR-4800-5p	AGUGGACCGAGGAAGGAAGGA	21	0.80858	1	GGACCGAGGAAGGAAGG	4	17
Homo sapiens	hsa-miR-4801	UACACAAGAAAACCAAGGCUCA	22	0.0696644	0	0	0	0
Homo sapiens	hsa-miR-4802-3p	UACAUGGAUGGAAACCUUCAAGC	23	0.207346	0	0	0	0
Homo sapiens	hsa-miR-4802-5p	UAUGGAGGUUCUAGACCAUGUU	22	0.0237405	0	0	0	0
Homo sapiens	hsa-miR-4803	UAACAUAAUAGUGUGGAUUGA	21	0.793556	0	0	0	0
Homo sapiens	hsa-miR-4804-3p	UGCUUAACCUUGCCCUCGAAA	21	0.0169773	0	0	0	0
Homo sapiens	hsa-miR-4804-5p	UUGGACGGUAAGGUUAAGCAA	21	0.868604	0	0	0	0
Homo sapiens	hsa-miR-483-3p	UCACUCCUCUCCUCCCGUCUU	21	0.000487996	0	0	0	0
Homo sapiens	hsa-miR-483-5p	AAGACGGGAGGAAAGAAGGGAG	22	0.693176	0	0	0	0
Homo sapiens	hsa-miR-484	UCAGGCUCAGUCCCCUCCCGAU	22	0.000351816	0	0	0	0
Homo sapiens	hsa-miR-485-3p	GUCAUACACGGCUCUCCUCUCU	22	0.0520074	0	0	0	0
Homo sapiens	hsa-miR-485-5p	AGAGGCUGGCCGUGAUGAAUUC	22	0.0654738	0	0	0	0
Homo sapiens	hsa-miR-486-3p	CGGGGCAGCUCAGUACAGGAU	21	0.674014	0	0	0	0
Homo sapiens	hsa-miR-486-5p	UCCUGUACUGAGCUGCCCCGAG	22	0.00123086	0	0	0	0
Homo sapiens	hsa-miR-487a-3p	AAUCAUACAGGGACAUCCAGUU	22	0.502968	0	0	0	0
Homo sapiens	hsa-miR-487a-5p	GUGGUUAUCCCUGCUGUGUUCG	22	0.00828315	0	0	0	0
Homo sapiens	hsa-miR-487b-3p	AAUCGUACAGGGUCAUCCACUU	22	0.211493	0	0	0	0
Homo sapiens	hsa-miR-487b-5p	GUGGUUAUCCCUGUCCUGUUCG	22	0.00256147	0	0	0	0
Homo sapiens	hsa-miR-488-3p	UUGAAAGGCUAUUUCUUGGUC	21	0.00122667	0	0	0	0
Homo sapiens	hsa-miR-488-5p	CCCAGAUAAUGGCACUCUCAA	21	0.0272237	0	0	0	0
Homo sapiens	hsa-miR-489-3p	GUGACAUCACAUAUACGGCAGC	22	0.0781685	0	0	0	0
Homo sapiens	hsa-miR-489-5p	GGUCGUAUGUGUGACGCCAUUU	22	0.00436094	0	0	0	0
Homo sapiens	hsa-miR-490-3p	CAACCUGGAGGACUCCAUGCUG	22	0.191215	0	0	0	0
Homo sapiens	hsa-miR-490-5p	CCAUGGAUCUCCAGGUGGGU	20	0.546958	0	0	0	0
Homo sapiens	hsa-miR-491-3p	CUUAUGCAAGAUUCCCUUCUAC	22	0.000312869	0	0	0	0
Homo sapiens	hsa-miR-491-5p	AGUGGGGAACCCUUCCAUGAGG	22	0.107345	0	0	0	0
Homo sapiens	hsa-miR-492	AGGACCUGCGGGACAAGAUUCUU	23	0.308508	0	0	0	0
Homo sapiens	hsa-miR-493-3p	UGAAGGUCUACUGUGUGCCAGG	22	0.270157	0	0	0	0
Homo sapiens	hsa-miR-493-5p	UUGUACAUGGUAGGCUUUCAUU	22	0.0192896	0	0	0	0
Homo sapiens	hsa-miR-494-3p	UGAAACAUACACGGGAAACCUC	22	0.516923	0	0	0	0
Homo sapiens	hsa-miR-494-5p	AGGUUGUCCGUGUUGUCUUCUCU	23	0.171843	0	0	0	0
Homo sapiens	hsa-miR-495-3p	AAACAAACAUGGUGCACUUCUU	22	0.151275	0	0	0	0
Homo sapiens	hsa-miR-495-5p	GAAGUUGCCCAUGUUAUUUUCG	22	0.000249863	0	0	0	0
Homo sapiens	hsa-miR-496	UGAGUAUUACAUGGCCAAUCUC	22	0.0139566	0	0	0	0
Homo sapiens	hsa-miR-497-3p	CAAACCACACUGUGGUGUUAGA	22	0.296484	0	0	0	0
Homo sapiens	hsa-miR-497-5p	CAGCAGCACACUGUGGUUUGU	21	0.0549365	0	0	0	0
Homo sapiens	hsa-miR-498-3p	AAAGCACCUCCAGAGCUUGAAGC	23	0.0108842	0	0	0	0
Homo sapiens	hsa-miR-498-5p	UUUCAAGCCAGGGGGCGUUUUUC	23	0.000922179	0	0	0	0
Homo sapiens	hsa-miR-4999-3p	UCACUACCUGACAAUACAGU	20	0.100705	0	0	0	0
Homo sapiens	hsa-miR-4999-5p	UGCUGUAUUGUCAGGUAGUGA	21	0.0249087	0	0	0	0
Homo sapiens	hsa-miR-499a-3p	AACAUCACAGCAAGUCUGUGCU	22	0.326616	0	0	0	0
Homo sapiens	hsa-miR-499a-5p	UUAAGACUUGCAGUGAUGUUU	21	0.049851	0	0	0	0
Homo sapiens	hsa-miR-499b-3p	AACAUCACUGCAAGUCUUAACA	22	0.410267	0	0	0	0
Homo sapiens	hsa-miR-499b-5p	ACAGACUUGCUGUGAUGUUCA	21	0.0965216	0	0	0	0
Homo sapiens	hsa-miR-5000-3p	UCAGGACACUUCUGAACUUGGA	22	0.231882	0	0	0	0
Homo sapiens	hsa-miR-5000-5p	CAGUUCAGAAGUGUUCCUGAGU	22	0.0142577	0	0	0	0
Homo sapiens	hsa-miR-5001-3p	UUCUGCCUCUGUCCAGGUCCUU	22	0.00942901	0	0	0	0
Homo sapiens	hsa-miR-5001-5p	AGGGCUGGACUCAGCGGCGGAGCU	24	0.455431	1	GGGCUGGACUCAGCGGCGG	2	19
Homo sapiens	hsa-miR-5002-3p	UGACUGCCUCACUGACCACUU	21	0.0552693	0	0	0	0
Homo sapiens	hsa-miR-5002-5p	AAUUUGGUUUCUGAGGCACUUAGU	24	0.00634362	0	0	0	0
Homo sapiens	hsa-miR-5003-3p	UACUUUUCUAGGUUGUUGGGG	21	0.0280858	0	0	0	0
Homo sapiens	hsa-miR-5003-5p	UCACAACAACCUUGCAGGGUAGA	23	0.29757	0	0	0	0
Homo sapiens	hsa-miR-5004-3p	CUUGGAUUUUCCUGGGCCUCAG	22	0.000904566	0	0	0	0
Homo sapiens	hsa-miR-5004-5p	UGAGGACAGGGCAAAUUCACGA	22	0.195813	0	0	0	0
Homo sapiens	hsa-miR-5006-3p	UUUCCCUUUCCAUCCUGGCAG	21	8.21154e-05	0	0	0	0
Homo sapiens	hsa-miR-5006-5p	UUGCCAGGGCAGGAGGUGGAA	21	0.824356	1	GGGCAGGAGGUGG	7	13
Homo sapiens	hsa-miR-5007-3p	AUCAUAUGAACCAAACUCUAAU	22	0.0158925	0	0	0	0
Homo sapiens	hsa-miR-5007-5p	UAGAGUCUGGCUGAUAUGGUUU	22	0.00748096	0	0	0	0
Homo sapiens	hsa-miR-5008-3p	CCUGUGCUCCCAGGGCCUCGC	21	0.0236856	0	0	0	0
Homo sapiens	hsa-miR-5008-5p	UGAGGCCCUUGGGGCACAGUGG	22	0.339111	0	0	0	0
Homo sapiens	hsa-miR-5009-3p	UCCUAAAUCUGAAAGUCCAAAA	22	0.00522437	0	0	0	0
Homo sapiens	hsa-miR-5009-5p	UUGGACUUUUUCAGAUUUGGGGAU	24	0.000702643	0	0	0	0
Homo sapiens	hsa-miR-500a-3p	AUGCACCUGGGCAAGGAUUCUG	22	0.539982	0	0	0	0
Homo sapiens	hsa-miR-500a-5p	UAAUCCUUGCUACCUGGGUGAGA	23	0.0671429	0	0	0	0
Homo sapiens	hsa-miR-500b-3p	GCACCCAGGCAAGGAUUCUG	20	0.0995708	0	0	0	0
Homo sapiens	hsa-miR-500b-5p	AAUCCUUGCUACCUGGGU	18	0.109583	0	0	0	0
Homo sapiens	hsa-miR-501-3p	AAUGCACCCGGGCAAGGAUUCU	22	0.206998	0	0	0	0
Homo sapiens	hsa-miR-501-5p	AAUCCUUUGUCCCUGGGUGAGA	22	0.00150863	0	0	0	0
Homo sapiens	hsa-miR-5010-3p	UUUUGUGUCUCCCAUUCCCCAG	22	4.76058e-05	0	0	0	0
Homo sapiens	hsa-miR-5010-5p	AGGGGGAUGGCAGAGCAAAAUU	22	0.555466	0	0	0	0
Homo sapiens	hsa-miR-5011-3p	GUGCAUGGCUGUAUAUAUAACA	22	0.00475295	0	0	0	0
Homo sapiens	hsa-miR-5011-5p	UAUAUAUACAGCCAUGCACUC	21	0.000934825	0	0	0	0
Homo sapiens	hsa-miR-502-3p	AAUGCACCUGGGCAAGGAUUCA	22	0.413733	0	0	0	0
Homo sapiens	hsa-miR-502-5p	AUCCUUGCUAUCUGGGUGCUA	21	0.0113862	0	0	0	0
Homo sapiens	hsa-miR-503-3p	GGGGUAUUGUUUCCGCUGCCAGG	23	0.00374922	0	0	0	0
Homo sapiens	hsa-miR-503-5p	UAGCAGCGGGAACAGUUCUGCAG	23	0.394543	0	0	0	0
Homo sapiens	hsa-miR-504-3p	GGGAGUGCAGGGCAGGGUUUC	21	0.647032	0	0	0	0
Homo sapiens	hsa-miR-504-5p	AGACCCUGGUCUGCACUCUAUC	22	0.0027216	0	0	0	0
Homo sapiens	hsa-miR-5047	UUGCAGCUGCGGUUGUAAGGU	21	0.573147	0	0	0	0
Homo sapiens	hsa-miR-505-3p	CGUCAACACUUGCUGGUUUCCU	22	0.00729999	0	0	0	0
Homo sapiens	hsa-miR-505-5p	GGGAGCCAGGAAGUAUUGAUGU	22	0.072404	0	0	0	0
Homo sapiens	hsa-miR-506-3p	UAAGGCACCCUUCUGAGUAGA	21	0.0263029	0	0	0	0
Homo sapiens	hsa-miR-506-5p	UAUUCAGGAAGGUGUUACUUAA	22	0.0655568	0	0	0	0
Homo sapiens	hsa-miR-507	UUUUGCACCUUUUGGAGUGAA	21	0.000219374	0	0	0	0
Homo sapiens	hsa-miR-508-3p	UGAUUGUAGCCUUUUGGAGUAGA	23	0.00183687	0	0	0	0
Homo sapiens	hsa-miR-508-5p	UACUCCAGAGGGCGUCACUCAUG	23	0.0233856	0	0	0	0
Homo sapiens	hsa-miR-5087	GGGUUUGUAGCUUUGCUGGCAUG	23	0.0266624	0	0	0	0
Homo sapiens	hsa-miR-5088-3p	UCCCUUCUUCCUGGGCCCUCA	21	0.000518433	0	0	0	0
Homo sapiens	hsa-miR-5088-5p	CAGGGCUCAGGGAUUGGAUGGAGG	24	0.893861	1	GGGCUCAGGGAUUGGAUGGAGG	3	22
Homo sapiens	hsa-miR-5089-3p	AUGCUACUCGGAAAUCCCACUGA	23	0.0103375	0	0	0	0
Homo sapiens	hsa-miR-5089-5p	GUGGGAUUUCUGAGUAGCAUC	21	0.0513114	0	0	0	0
Homo sapiens	hsa-miR-509-3-5p	UACUGCAGACGUGGCAAUCAUG	22	0.199131	0	0	0	0
Homo sapiens	hsa-miR-509-3p	UGAUUGGUACGUCUGUGGGUAG	22	0.636878	0	0	0	0
Homo sapiens	hsa-miR-509-5p	UACUGCAGACAGUGGCAAUCA	21	0.118415	0	0	0	0
Homo sapiens	hsa-miR-5090	CCGGGGCAGAUUGGUGUAGGGUG	23	0.841776	0	0	0	0
Homo sapiens	hsa-miR-5091	ACGGAGACGACAAGACUGUGCUG	23	0.135471	0	0	0	0
Homo sapiens	hsa-miR-5092	AAUCCACGCUGAGCUUGGCAUC	22	0.145241	0	0	0	0
Homo sapiens	hsa-miR-5093	AGGAAAUGAGGCUGGCUAGGAGC	23	0.434543	1	GGAAAUGAGGCUGGCUAGG	2	19
Homo sapiens	hsa-miR-5094	AAUCAGUGAAUGCCUUGAACCU	22	0.146521	0	0	0	0
Homo sapiens	hsa-miR-510-3p	AUUGAAACCUCUAAGAGUGGA	21	0.0400333	0	0	0	0
Homo sapiens	hsa-miR-510-5p	UACUCAGGAGAGUGGCAAUCAC	22	0.0781022	0	0	0	0
Homo sapiens	hsa-miR-5100	UUCAGAUCCCAGCGGUGCCUCU	22	0.0028152	0	0	0	0
Homo sapiens	hsa-miR-511-3p	AAUGUGUAGCAAAAGACAGA	20	0.0334067	0	0	0	0
Homo sapiens	hsa-miR-511-5p	GUGUCUUUUGCUCUGCAGUCA	21	0.00230231	0	0	0	0
Homo sapiens	hsa-miR-512-3p	AAGUGCUGUCAUAGCUGAGGUC	22	0.433284	0	0	0	0
Homo sapiens	hsa-miR-512-5p	CACUCAGCCUUGAGGGCACUUUC	23	0.0141237	0	0	0	0
Homo sapiens	hsa-miR-513a-3p	UAAAUUUCACCUUUCUGAGAAGG	23	0.000507126	0	0	0	0
Homo sapiens	hsa-miR-513a-5p	UUCACAGGGAGGUGUCAU	18	0.467979	0	0	0	0
Homo sapiens	hsa-miR-513b-3p	AAAUGUCACCUUUUUGAGAGGA	22	0.000334525	0	0	0	0
Homo sapiens	hsa-miR-513b-5p	UUCACAAGGAGGUGUCAUUUAU	22	0.00407807	0	0	0	0
Homo sapiens	hsa-miR-513c-3p	UAAAUUUCACCUUUCUGAGAAGA	23	0.000228605	0	0	0	0
Homo sapiens	hsa-miR-513c-5p	UUCUCAAGGAGGUGUCGUUUAU	22	0.00860485	0	0	0	0
Homo sapiens	hsa-miR-514a-3p	AUUGACACUUCUGUGAGUAGA	21	0.0329882	0	0	0	0
Homo sapiens	hsa-miR-514a-5p	UACUCUGGAGAGUGACAAUCAUG	23	0.104768	0	0	0	0
Homo sapiens	hsa-miR-514b-3p	AUUGACACCUCUGUGAGUGGA	21	0.198035	0	0	0	0
Homo sapiens	hsa-miR-514b-5p	UUCUCAAGAGGGAGGCAAUCAU	22	0.173882	0	0	0	0
Homo sapiens	hsa-miR-515-3p	GAGUGCCUUCUUUUGGAGCGUU	22	0.00205019	0	0	0	0
Homo sapiens	hsa-miR-515-5p	UUCUCCAAAAGAAAGCACUUUCUG	24	0.000909386	0	0	0	0
Homo sapiens	hsa-miR-516a-3p	UGCUUCCUUUCAGAGGGU	18	0.000998181	0	0	0	0
Homo sapiens	hsa-miR-516a-5p	UUCUCGAGGAAAGAAGCACUUUC	23	0.00366008	0	0	0	0
Homo sapiens	hsa-miR-516b-3p	UGCUUCCUUUCAGAGGGU	18	0.000998181	0	0	0	0
Homo sapiens	hsa-miR-516b-5p	AUCUGGAGGUAAGAAGCACUUU	22	0.0426192	0	0	0	0
Homo sapiens	hsa-miR-517-5p	CCUCUAGAUGGAAGCACUGUCU	22	0.129041	0	0	0	0
Homo sapiens	hsa-miR-517a-3p	AUCGUGCAUCCCUUUAGAGUGU	22	0.00284867	0	0	0	0
Homo sapiens	hsa-miR-517b-3p	AUCGUGCAUCCCUUUAGAGUGU	22	0.00284867	0	0	0	0
Homo sapiens	hsa-miR-517c-3p	AUCGUGCAUCCUUUUAGAGUGU	22	0.00153451	0	0	0	0
Homo sapiens	hsa-miR-5186	AGAGAUUGGUAGAAAUCAGGU	21	0.0157407	0	0	0	0
Homo sapiens	hsa-miR-5187-3p	ACUGAAUCCUCUUUUCCUCAG	21	0.00016666	0	0	0	0
Homo sapiens	hsa-miR-5187-5p	UGGGAUGAGGGAUUGAAGUGGA	22	0.919317	0	0	0	0
Homo sapiens	hsa-miR-5188	AAUCGGACCCAUUUAAACCGGAG	23	0.0142448	0	0	0	0
Homo sapiens	hsa-miR-5189-3p	UGCCAACCGUCAGAGCCCAGA	21	0.00174347	0	0	0	0
Homo sapiens	hsa-miR-5189-5p	UCUGGGCACAGGCGGAUGGACAGG	24	0.873181	1	GGGCACAGGCGGAUGGACAGG	4	21
Homo sapiens	hsa-miR-518a-3p	GAAAGCGCUUCCCUUUGCUGGA	22	0.00174515	0	0	0	0
Homo sapiens	hsa-miR-518a-5p	CUGCAAAGGGAAGCCCUUUC	20	0.00776594	0	0	0	0
Homo sapiens	hsa-miR-518b	CAAAGCGCUCCCCUUUAGAGGU	22	0.000582326	0	0	0	0
Homo sapiens	hsa-miR-518c-3p	CAAAGCGCUUCUCUUUAGAGUGU	23	0.00689277	0	0	0	0
Homo sapiens	hsa-miR-518c-5p	UCUCUGGAGGGAAGCACUUUCUG	23	0.0760231	0	0	0	0
Homo sapiens	hsa-miR-518d-3p	CAAAGCGCUUCCCUUUGGAGC	21	0.0011247	0	0	0	0
Homo sapiens	hsa-miR-518d-5p	CUCUAGAGGGAAGCACUUUCUG	22	0.0133867	0	0	0	0
Homo sapiens	hsa-miR-518e-3p	AAAGCGCUUCCCUUCAGAGUG	21	0.00104776	0	0	0	0
Homo sapiens	hsa-miR-518e-5p	CUCUAGAGGGAAGCGCUUUCUG	22	0.012998	0	0	0	0
Homo sapiens	hsa-miR-518f-3p	GAAAGCGCUUCUCUUUAGAGG	21	0.00518417	0	0	0	0
Homo sapiens	hsa-miR-518f-5p	CUCUAGAGGGAAGCACUUUCUC	22	0.0110444	0	0	0	0
Homo sapiens	hsa-miR-5190	CCAGUGACUGAGCUGGAGCCA	21	0.0884865	0	0	0	0
Homo sapiens	hsa-miR-5191	AGGAUAGGAAGAAUGAAGUGCU	22	0.715106	0	0	0	0
Homo sapiens	hsa-miR-5192	AGGAGAGUGGAUUCCAGGUGGU	22	0.0772422	1	GGAGAGUGGAUUCCAGGUGG	2	20
Homo sapiens	hsa-miR-5193	UCCUCCUCUACCUCAUCCCAGU	22	0.000496162	0	0	0	0
Homo sapiens	hsa-miR-5194	UGAGGGGUUUGGAAUGGGAUGG	22	0.843594	1	GGGGUUUGGAAUGGGAUGG	4	19
Homo sapiens	hsa-miR-5195-3p	AUCCAGUUCUCUGAGGGGGCU	21	0.549039	0	0	0	0
Homo sapiens	hsa-miR-5195-5p	AACCCCUAAGGCAACUGGAUGG	22	0.0583745	0	0	0	0
Homo sapiens	hsa-miR-5196-3p	UCAUCCUCGUCUCCCUCCCAG	21	0.000289711	0	0	0	0
Homo sapiens	hsa-miR-5196-5p	AGGGAAGGGGACGAGGGUUGGG	22	0.996611	1	GGGAAGGGGACGAGGGUUGGG	2	21
Homo sapiens	hsa-miR-5197-3p	AAGAAGAGACUGAGUCAUCGAAU	23	0.0128438	0	0	0	0
Homo sapiens	hsa-miR-5197-5p	CAAUGGCACAAACUCAUUCUUGA	23	0.0604834	0	0	0	0
Homo sapiens	hsa-miR-519a-2-5p	CCUCUACAGGGAAGCGCUUUC	21	0.0257393	0	0	0	0
Homo sapiens	hsa-miR-519a-3p	AAAGUGCAUCCUUUUAGAGUGU	22	0.00124394	0	0	0	0
Homo sapiens	hsa-miR-519a-5p	CUCUAGAGGGAAGCGCUUUCUG	22	0.012998	0	0	0	0
Homo sapiens	hsa-miR-519b-3p	AAAGUGCAUCCUUUUAGAGGUU	22	0.00197612	0	0	0	0
Homo sapiens	hsa-miR-519b-5p	CUCUAGAGGGAAGCGCUUUCUG	22	0.012998	0	0	0	0
Homo sapiens	hsa-miR-519c-3p	AAAGUGCAUCUUUUUAGAGGAU	22	0.00133714	0	0	0	0
Homo sapiens	hsa-miR-519c-5p	CUCUAGAGGGAAGCGCUUUCUG	22	0.012998	0	0	0	0
Homo sapiens	hsa-miR-519d-3p	CAAAGUGCCUCCCUUUAGAGUG	22	0.000940152	0	0	0	0
Homo sapiens	hsa-miR-519d-5p	CCUCCAAAGGGAAGCGCUUUCUGUU	25	0.0242773	0	0	0	0
Homo sapiens	hsa-miR-519e-3p	AAGUGCCUCCUUUUAGAGUGUU	22	0.000980349	0	0	0	0
Homo sapiens	hsa-miR-519e-5p	UUCUCCAAAAGGGAGCACUUUC	22	0.00445329	0	0	0	0
Homo sapiens	hsa-miR-520a-3p	AAAGUGCUUCCCUUUGGACUGU	22	0.00236409	0	0	0	0
Homo sapiens	hsa-miR-520a-5p	CUCCAGAGGGAAGUACUUUCU	21	0.00423953	0	0	0	0
Homo sapiens	hsa-miR-520b-3p	AAAGUGCUUCCUUUUAGAGGG	21	0.00106392	0	0	0	0
Homo sapiens	hsa-miR-520b-5p	CCUCUACAGGGAAGCGCUUUC	21	0.0257393	0	0	0	0
Homo sapiens	hsa-miR-520c-3p	AAAGUGCUUCCUUUUAGAGGGU	22	0.00154726	0	0	0	0
Homo sapiens	hsa-miR-520c-5p	CUCUAGAGGGAAGCACUUUCUG	22	0.0133867	0	0	0	0
Homo sapiens	hsa-miR-520d-3p	AAAGUGCUUCUCUUUGGUGGGU	22	0.0573486	0	0	0	0
Homo sapiens	hsa-miR-520d-5p	CUACAAAGGGAAGCCCUUUC	20	0.00451759	0	0	0	0
Homo sapiens	hsa-miR-520e-3p	AAAGUGCUUCCUUUUUGAGGG	21	0.000367756	0	0	0	0
Homo sapiens	hsa-miR-520e-5p	CUCAAGAUGGAAGCAGUUUCUG	22	0.0123716	0	0	0	0
Homo sapiens	hsa-miR-520f-3p	AAGUGCUUCCUUUUAGAGGGUU	22	0.00273764	0	0	0	0
Homo sapiens	hsa-miR-520f-5p	CCUCUAAAGGGAAGCGCUUUCU	22	0.0337011	0	0	0	0
Homo sapiens	hsa-miR-520g-3p	ACAAAGUGCUUCCCUUUAGAGUGU	24	0.00174113	0	0	0	0
Homo sapiens	hsa-miR-520g-5p	UCUAGAGGAAGCACUUUCUGUUU	23	0.0024115	0	0	0	0
Homo sapiens	hsa-miR-520h	ACAAAGUGCUUCCCUUUAGAGU	22	0.000958865	0	0	0	0
Homo sapiens	hsa-miR-521	AACGCACUUCCCUUUAGAGUGU	22	0.00169905	0	0	0	0
Homo sapiens	hsa-miR-522-3p	AAAAUGGUUCCCUUUAGAGUGU	22	0.000995202	0	0	0	0
Homo sapiens	hsa-miR-522-5p	CUCUAGAGGGAAGCGCUUUCUG	22	0.012998	0	0	0	0
Homo sapiens	hsa-miR-523-3p	GAACGCGCUUCCCUAUAGAGGGU	23	0.00340985	0	0	0	0
Homo sapiens	hsa-miR-523-5p	CUCUAGAGGGAAGCGCUUUCUG	22	0.012998	0	0	0	0
Homo sapiens	hsa-miR-524-3p	GAAGGCGCUUCCCUUUGGAGU	21	0.0026694	0	0	0	0
Homo sapiens	hsa-miR-524-5p	CUACAAAGGGAAGCACUUUCUC	22	0.0267997	0	0	0	0
Homo sapiens	hsa-miR-525-3p	GAAGGCGCUUCCCUUUAGAGCG	22	0.00134568	0	0	0	0
Homo sapiens	hsa-miR-525-5p	CUCCAGAGGGAUGCACUUUCU	21	0.00655894	0	0	0	0
Homo sapiens	hsa-miR-526a-3p	GAAAGCGCUUCCUUUUAGAGGA	22	0.000760824	0	0	0	0
Homo sapiens	hsa-miR-526a-5p	CUCUAGAGGGAAGCACUUUCUG	22	0.0133867	0	0	0	0
Homo sapiens	hsa-miR-526b-3p	GAAAGUGCUUCCUUUUAGAGGC	22	0.000686439	0	0	0	0
Homo sapiens	hsa-miR-526b-5p	CUCUUGAGGGAAGCACUUUCUGU	23	0.0472523	0	0	0	0
Homo sapiens	hsa-miR-527	CUGCAAAGGGAAGCCCUUUC	20	0.00776594	0	0	0	0
Homo sapiens	hsa-miR-532-3p	CCUCCCACACCCAAGGCUUGCA	22	0.00652735	0	0	0	0
Homo sapiens	hsa-miR-532-5p	CAUGCCUUGAGUGUAGGACCGU	22	0.340356	0	0	0	0
Homo sapiens	hsa-miR-539-3p	AUCAUACAAGGACAAUUUCUUU	22	0.00407644	0	0	0	0
Homo sapiens	hsa-miR-539-5p	GGAGAAAUUAUCCUUGGUGUGU	22	0.00544736	0	0	0	0
Homo sapiens	hsa-miR-541-3p	UGGUGGGCACAGAAUCUGGACU	22	0.595174	0	0	0	0
Homo sapiens	hsa-miR-541-5p	AAAGGAUUCUGCUGUCGGUCCCACU	25	0.0281495	0	0	0	0
Homo sapiens	hsa-miR-542-3p	UGUGACAGAUUGAUAACUGAAA	22	0.162117	0	0	0	0
Homo sapiens	hsa-miR-542-5p	UCGGGGAUCAUCAUGUCACGAGA	23	0.320871	0	0	0	0
Homo sapiens	hsa-miR-543	AAACAUUCGCGGUGCACUUCUU	22	0.0507668	0	0	0	0
Homo sapiens	hsa-miR-544a	AUUCUGCAUUUUUAGCAAGUUC	22	0.000347111	0	0	0	0
Homo sapiens	hsa-miR-544b	ACCUGAGGUUGUGCAUUUCUAA	22	0.0191628	0	0	0	0
Homo sapiens	hsa-miR-545-3p	UCAGCAAACAUUUAUUGUGUGC	22	0.00153612	0	0	0	0
Homo sapiens	hsa-miR-545-5p	UCAGUAAAUGUUUAUUAGAUGA	22	0.00202533	0	0	0	0
Homo sapiens	hsa-miR-548a-3p	CAAAACUGGCAAUUACUUUUGC	22	0.00175638	0	0	0	0
Homo sapiens	hsa-miR-548a-5p	AAAAGUAAUUGCGAGUUUUACC	22	0.00150561	0	0	0	0
Homo sapiens	hsa-miR-548aa	AAAAACCACAAUUACUUUUGCACCA	25	0.00190039	0	0	0	0
Homo sapiens	hsa-miR-548ab	AAAAGUAAUUGUGGAUUUUGCU	22	0.00327739	0	0	0	0
Homo sapiens	hsa-miR-548ac	CAAAAACCGGCAAUUACUUUUG	22	0.00129897	0	0	0	0
Homo sapiens	hsa-miR-548ad-3p	GAAAACGACAAUGACUUUUGCA	22	0.00211501	0	0	0	0
Homo sapiens	hsa-miR-548ad-5p	AAAAGUAAUUGUGGUUUUUG	20	0.00049263	0	0	0	0
Homo sapiens	hsa-miR-548ae-3p	CAAAAACUGCAAUUACUUUCA	21	0.00226647	0	0	0	0
Homo sapiens	hsa-miR-548ae-5p	AAAAGUAAUUGUGGUUUUUG	20	0.00049263	0	0	0	0
Homo sapiens	hsa-miR-548ag	AAAGGUAAUUGUGGUUUCUGC	21	0.0344227	0	0	0	0
Homo sapiens	hsa-miR-548ah-3p	CAAAAACUGCAGUUACUUUUGC	22	0.00223119	0	0	0	0
Homo sapiens	hsa-miR-548ah-5p	AAAAGUGAUUGCAGUGUUUG	20	0.0233733	0	0	0	0
Homo sapiens	hsa-miR-548ai	AAAGGUAAUUGCAGUUUUUCCC	22	0.000151669	0	0	0	0
Homo sapiens	hsa-miR-548aj-3p	UAAAAACUGCAAUUACUUUUA	21	0.00132534	0	0	0	0
Homo sapiens	hsa-miR-548aj-5p	UGCAAAAGUAAUUGCAGUUUUUG	23	0.000660887	0	0	0	0
Homo sapiens	hsa-miR-548ak	AAAAGUAACUGCGGUUUUUGA	21	0.000711252	0	0	0	0
Homo sapiens	hsa-miR-548al	AACGGCAAUGACUUUUGUACCA	22	0.00558243	0	0	0	0
Homo sapiens	hsa-miR-548am-3p	CAAAAACUGCAGUUACUUUUGU	22	0.00257659	0	0	0	0
Homo sapiens	hsa-miR-548am-5p	AAAAGUAAUUGCGGUUUUUGCC	22	0.000447747	0	0	0	0
Homo sapiens	hsa-miR-548an	AAAAGGCAUUGUGGUUUUUG	20	0.000675674	0	0	0	0
Homo sapiens	hsa-miR-548ao-3p	AAAGACCGUGACUACUUUUGCA	22	0.000877154	0	0	0	0
Homo sapiens	hsa-miR-548ao-5p	AGAAGUAACUACGGUUUUUGCA	22	0.000738876	0	0	0	0
Homo sapiens	hsa-miR-548ap-3p	AAAAACCACAAUUACUUUU	19	0.000490848	0	0	0	0
Homo sapiens	hsa-miR-548ap-5p	AAAAGUAAUUGCGGUCUUU	19	0.00860608	0	0	0	0
Homo sapiens	hsa-miR-548aq-3p	CAAAAACUGCAAUUACUUUUGC	22	0.0011146	0	0	0	0
Homo sapiens	hsa-miR-548aq-5p	GAAAGUAAUUGCUGUUUUUGCC	22	0.000590075	0	0	0	0
Homo sapiens	hsa-miR-548ar-3p	UAAAACUGCAGUUAUUUUUGC	21	0.000109656	0	0	0	0
Homo sapiens	hsa-miR-548ar-5p	AAAAGUAAUUGCAGUUUUUGC	21	0.000388967	0	0	0	0
Homo sapiens	hsa-miR-548as-3p	UAAAACCCACAAUUAUGUUUGU	22	0.00112798	0	0	0	0
Homo sapiens	hsa-miR-548as-5p	AAAAGUAAUUGCGGGUUUUGCC	22	0.00439462	0	0	0	0
Homo sapiens	hsa-miR-548at-3p	CAAAACCGCAGUAACUUUUGU	21	0.00243093	0	0	0	0
Homo sapiens	hsa-miR-548at-5p	AAAAGUUAUUGCGGUUUUGGCU	22	0.000938691	0	0	0	0
Homo sapiens	hsa-miR-548au-3p	UGGCAGUUACUUUUGCACCAG	21	0.00502997	0	0	0	0
Homo sapiens	hsa-miR-548au-5p	AAAAGUAAUUGCGGUUUUUGC	21	0.000429817	0	0	0	0
Homo sapiens	hsa-miR-548av-3p	AAAACUGCAGUUACUUUUGC	20	0.00187195	0	0	0	0
Homo sapiens	hsa-miR-548av-5p	AAAAGUACUUGCGGAUUU	18	0.00766002	0	0	0	0
Homo sapiens	hsa-miR-548aw	GUGCAAAAGUCAUCACGGUU	20	0.225657	0	0	0	0
Homo sapiens	hsa-miR-548ax	AGAAGUAAUUGCGGUUUUGCCA	22	0.0015293	0	0	0	0
Homo sapiens	hsa-miR-548ay-3p	CAAAACCGCGAUUACUCUUGCA	22	0.0538965	0	0	0	0
Homo sapiens	hsa-miR-548ay-5p	AAAAGUAAUUGUGGUUUUUGC	21	0.000564737	0	0	0	0
Homo sapiens	hsa-miR-548az-3p	AAAAACUGCAAUCACUUUUGC	21	0.00105164	0	0	0	0
Homo sapiens	hsa-miR-548az-5p	CAAAAGUGAUUGUGGUUUUUGC	22	0.000894651	0	0	0	0
Homo sapiens	hsa-miR-548b-3p	CAAGAACCUCAGUUGCUUUUGU	22	0.00198741	0	0	0	0
Homo sapiens	hsa-miR-548b-5p	AAAAGUAAUUGUGGUUUUGGCC	22	0.00355954	0	0	0	0
Homo sapiens	hsa-miR-548ba	AAAGGUAACUGUGAUUUUUGCU	22	0.00141591	0	0	0	0
Homo sapiens	hsa-miR-548bb-3p	CAAAAACCAUAGUUACUUUUGC	22	0.0034945	0	0	0	0
Homo sapiens	hsa-miR-548bb-5p	AAAAGUAACUAUGGUUUUUGCC	22	0.000141528	0	0	0	0
Homo sapiens	hsa-miR-548bc	AAAAACUGUGAUUACUUUUGC	21	0.00124763	0	0	0	0
Homo sapiens	hsa-miR-548c-3p	CAAAAAUCUCAAUUACUUUUGC	22	0.000679127	0	0	0	0
Homo sapiens	hsa-miR-548c-5p	AAAAGUAAUUGCGGUUUUUGCC	22	0.000447747	0	0	0	0
Homo sapiens	hsa-miR-548d-3p	CAAAAACCACAGUUUCUUUUGC	22	0.000283451	0	0	0	0
Homo sapiens	hsa-miR-548d-5p	AAAAGUAAUUGUGGUUUUUGCC	22	0.000579554	0	0	0	0
Homo sapiens	hsa-miR-548e-3p	AAAAACUGAGACUACUUUUGCA	22	0.000372897	0	0	0	0
Homo sapiens	hsa-miR-548e-5p	CAAAAGCAAUCGCGGUUUUUGC	22	0.000832462	0	0	0	0
Homo sapiens	hsa-miR-548f-3p	AAAAACUGUAAUUACUUUU	19	0.000634365	0	0	0	0
Homo sapiens	hsa-miR-548f-5p	UGCAAAAGUAAUCACAGUUUUU	22	0.000693337	0	0	0	0
Homo sapiens	hsa-miR-548g-3p	AAAACUGUAAUUACUUUUGUAC	22	0.00165343	0	0	0	0
Homo sapiens	hsa-miR-548g-5p	UGCAAAAGUAAUUGCAGUUUUUG	23	0.000660887	0	0	0	0
Homo sapiens	hsa-miR-548h-3p	CAAAAACCGCAAUUACUUUUGCA	23	0.00142213	0	0	0	0
Homo sapiens	hsa-miR-548h-5p	AAAAGUAAUCGCGGUUUUUGUC	22	0.00118402	0	0	0	0
Homo sapiens	hsa-miR-548i	AAAAGUAAUUGCGGAUUUUGCC	22	0.00162876	0	0	0	0
Homo sapiens	hsa-miR-548j-3p	CAAAAACUGCAUUACUUUUGC	21	0.000905297	0	0	0	0
Homo sapiens	hsa-miR-548j-5p	AAAAGUAAUUGCGGUCUUUGGU	22	0.0194767	0	0	0	0
Homo sapiens	hsa-miR-548k	AAAAGUACUUGCGGAUUUUGCU	22	0.00262861	0	0	0	0
Homo sapiens	hsa-miR-548l	AAAAGUAUUUGCGGGUUUUGUC	22	0.00026355	0	0	0	0
Homo sapiens	hsa-miR-548m	CAAAGGUAUUUGUGGUUUUUG	21	7.61393e-05	0	0	0	0
Homo sapiens	hsa-miR-548n	CAAAAGUAAUUGUGGAUUUUGU	22	0.00325698	0	0	0	0
Homo sapiens	hsa-miR-548o-3p	CCAAAACUGCAGUUACUUUUGC	22	0.00253856	0	0	0	0
Homo sapiens	hsa-miR-548o-5p	AAAAGUAAUUGCGGUUUUUGCC	22	0.000447747	0	0	0	0
Homo sapiens	hsa-miR-548p	UAGCAAAAACUGCAGUUACUUU	22	0.0166208	0	0	0	0
Homo sapiens	hsa-miR-548q	GCUGGUGCAAAAGUAAUGGCGG	22	0.364402	0	0	0	0
Homo sapiens	hsa-miR-548s	AUGGCCAAAACUGCAGUUAUUUU	23	0.000433179	0	0	0	0
Homo sapiens	hsa-miR-548t-3p	AAAAACCACAAUUACUUUUGCACCA	25	0.00190039	0	0	0	0
Homo sapiens	hsa-miR-548t-5p	CAAAAGUGAUCGUGGUUUUUG	21	0.00125984	0	0	0	0
Homo sapiens	hsa-miR-548u	CAAAGACUGCAAUUACUUUUGCG	23	0.00141807	0	0	0	0
Homo sapiens	hsa-miR-548v	AGCUACAGUUACUUUUGCACCA	22	0.00264677	0	0	0	0
Homo sapiens	hsa-miR-548w	AAAAGUAACUGCGGUUUUUGCCU	23	0.000897044	0	0	0	0
Homo sapiens	hsa-miR-548x-3p	UAAAAACUGCAAUUACUUUC	20	0.00385659	0	0	0	0
Homo sapiens	hsa-miR-548x-5p	UGCAAAAGUAAUUGCAGUUUUUG	23	0.000660887	0	0	0	0
Homo sapiens	hsa-miR-548y	AAAAGUAAUCACUGUUUUUGCC	22	0.000585476	0	0	0	0
Homo sapiens	hsa-miR-548z	CAAAAACCGCAAUUACUUUUGCA	23	0.00142213	0	0	0	0
Homo sapiens	hsa-miR-549a-3p	UGACAACUAUGGAUGAGCUCU	21	0.0227146	0	0	0	0
Homo sapiens	hsa-miR-549a-5p	AGCUCAUCCAUAGUUGUCACUG	22	0.0702046	0	0	0	0
Homo sapiens	hsa-miR-550a-3-5p	AGUGCCUGAGGGAGUAAGAG	20	0.234688	0	0	0	0
Homo sapiens	hsa-miR-550a-3p	UGUCUUACUCCCUCAGGCACAU	22	0.0153132	0	0	0	0
Homo sapiens	hsa-miR-550a-5p	AGUGCCUGAGGGAGUAAGAGCCC	23	0.0398096	0	0	0	0
Homo sapiens	hsa-miR-550b-2-5p	AUGUGCCUGAGGGAGUAAGACA	22	0.311331	0	0	0	0
Homo sapiens	hsa-miR-550b-3p	UCUUACUCCCUCAGGCACUG	20	0.00774228	0	0	0	0
Homo sapiens	hsa-miR-551a	GCGACCCACUCUUGGUUUCCA	21	0.000913797	0	0	0	0
Homo sapiens	hsa-miR-551b-3p	GCGACCCAUACUUGGUUUCAG	21	0.00302571	0	0	0	0
Homo sapiens	hsa-miR-551b-5p	GAAAUCAAGCGUGGGUGAGACC	22	0.18392	0	0	0	0
Homo sapiens	hsa-miR-552-3p	AACAGGUGACUGGUUAGACAA	21	0.49086	0	0	0	0
Homo sapiens	hsa-miR-552-5p	GUUUAACCUUUUGCCUGUUGG	21	0.00126385	0	0	0	0
Homo sapiens	hsa-miR-553	AAAACGGUGAGAUUUUGUUUU	21	0.00011345	0	0	0	0
Homo sapiens	hsa-miR-554	GCUAGUCCUGACUCAGCCAGU	21	0.0104031	0	0	0	0
Homo sapiens	hsa-miR-555	AGGGUAAGCUGAACCUCUGAU	21	0.614745	0	0	0	0
Homo sapiens	hsa-miR-556-3p	AUAUUACCAUUAGCUCAUCUUU	22	0.00172097	0	0	0	0
Homo sapiens	hsa-miR-556-5p	GAUGAGCUCAUUGUAAUAUGAG	22	0.0146922	0	0	0	0
Homo sapiens	hsa-miR-557	GUUUGCACGGGUGGGCCUUGUCU	23	0.340383	0	0	0	0
Homo sapiens	hsa-miR-5571-3p	GUCCUAGGAGGCUCCUCUG	19	0.0164311	0	0	0	0
Homo sapiens	hsa-miR-5571-5p	CAAUUCUCAAAGGAGCCUCCC	21	0.001884	0	0	0	0
Homo sapiens	hsa-miR-5572	GUUGGGGUGCAGGGGUCUGCU	21	0.985918	0	0	0	0
Homo sapiens	hsa-miR-5579-3p	UUAGCUUAAGGAGUACCAGAUC	22	0.365011	0	0	0	0
Homo sapiens	hsa-miR-5579-5p	UAUGGUACUCCUUAAGCUAAC	21	0.00717226	0	0	0	0
Homo sapiens	hsa-miR-558	UGAGCUGCUGUACCAAAAU	19	0.0736486	0	0	0	0
Homo sapiens	hsa-miR-5580-3p	CACAUAUGAAGUGAGCCAGCAC	22	0.0251904	0	0	0	0
Homo sapiens	hsa-miR-5580-5p	UGCUGGCUCAUUUCAUAUGUGU	22	0.00155198	0	0	0	0
Homo sapiens	hsa-miR-5581-3p	UUCCAUGCCUCCUAGAAGUUCC	22	0.000808715	0	0	0	0
Homo sapiens	hsa-miR-5581-5p	AGCCUUCCAGGAGAAAUGGAGA	22	0.00494458	0	0	0	0
Homo sapiens	hsa-miR-5582-3p	UAAAACUUUAAGUGUGCCUAGG	22	0.0293245	0	0	0	0
Homo sapiens	hsa-miR-5582-5p	UAGGCACACUUAAAGUUAUAGC	22	0.157033	0	0	0	0
Homo sapiens	hsa-miR-5583-3p	GAAUAUGGGUAUAUUAGUUUGG	22	0.000889489	0	0	0	0
Homo sapiens	hsa-miR-5583-5p	AAACUAAUAUACCCAUAUUCUG	22	0.000669206	0	0	0	0
Homo sapiens	hsa-miR-5584-3p	UAGUUCUUCCCUUUGCCCAAUU	22	0.000286492	0	0	0	0
Homo sapiens	hsa-miR-5584-5p	CAGGGAAAUGGGAAGAACUAGA	22	0.387645	0	0	0	0
Homo sapiens	hsa-miR-5585-3p	CUGAAUAGCUGGGACUACAGGU	22	0.612067	0	0	0	0
Homo sapiens	hsa-miR-5585-5p	UGAAGUACCAGCUACUCGAGAG	22	0.0123587	0	0	0	0
Homo sapiens	hsa-miR-5586-3p	CAGAGUGACAAGCUGGUUAAAG	22	0.250845	0	0	0	0
Homo sapiens	hsa-miR-5586-5p	UAUCCAGCUUGUUACUAUAUGC	22	0.000450419	0	0	0	0
Homo sapiens	hsa-miR-5587-3p	GCCCCGGGCAGUGUGAUCAUC	21	0.0507171	0	0	0	0
Homo sapiens	hsa-miR-5587-5p	AUGGUCACCUCCGGGACU	18	0.152167	0	0	0	0
Homo sapiens	hsa-miR-5588-3p	AAGUCCCACUAAUGCCAGC	19	0.00438396	0	0	0	0
Homo sapiens	hsa-miR-5588-5p	ACUGGCAUUAGUGGGACUUUU	21	0.0156855	0	0	0	0
Homo sapiens	hsa-miR-5589-3p	UGCACAUGGCAACCUAGCUCCCA	23	0.0147348	0	0	0	0
Homo sapiens	hsa-miR-5589-5p	GGCUGGGUGCUCUUGUGCAGU	21	0.618805	0	0	0	0
Homo sapiens	hsa-miR-559	UAAAGUAAAUAUGCACCAAAA	21	0.0180989	0	0	0	0
Homo sapiens	hsa-miR-5590-3p	AAUAAAGUUCAUGUAUGGCAA	21	0.0328227	0	0	0	0
Homo sapiens	hsa-miR-5590-5p	UUGCCAUACAUAGACUUUAUU	21	0.00152426	0	0	0	0
Homo sapiens	hsa-miR-5591-3p	AUACCCAUAGCUUAGCUCCCA	21	0.00600889	0	0	0	0
Homo sapiens	hsa-miR-5591-5p	UGGGAGCUAAGCUAUGGGUAU	21	0.0138407	0	0	0	0
Homo sapiens	hsa-miR-561-3p	CAAAGUUUAAGAUCCUUGAAGU	22	0.0152255	0	0	0	0
Homo sapiens	hsa-miR-561-5p	AUCAAGGAUCUUAAACUUUGCC	22	0.0653243	0	0	0	0
Homo sapiens	hsa-miR-562	AAAGUAGCUGUACCAUUUGC	20	0.00910557	0	0	0	0
Homo sapiens	hsa-miR-563	AGGUUGACAUACGUUUCCC	19	0.0064711	0	0	0	0
Homo sapiens	hsa-miR-564	AGGCACGGUGUCAGCAGGC	19	0.503589	0	0	0	0
Homo sapiens	hsa-miR-567	AGUAUGUUCUUCCAGGACAGAAC	23	0.00426538	0	0	0	0
Homo sapiens	hsa-miR-568	AUGUAUAAAUGUAUACACAC	20	0.00581734	0	0	0	0
Homo sapiens	hsa-miR-5680	GAGAAAUGCUGGACUAAUCUGC	22	0.114887	0	0	0	0
Homo sapiens	hsa-miR-5681a	AGAAAGGGUGGCAAUACCUCUU	22	0.372154	0	0	0	0
Homo sapiens	hsa-miR-5681b	AGGUAUUGCCACCCUUUCUAGU	22	0.000411709	0	0	0	0
Homo sapiens	hsa-miR-5682	GUAGCACCUUGCAGGAUAAGGU	22	0.738121	0	0	0	0
Homo sapiens	hsa-miR-5683	UACAGAUGCAGAUUCUCUGACUUC	24	0.0157637	0	0	0	0
Homo sapiens	hsa-miR-5684	AACUCUAGCCUGAGCAACAG	20	0.0483898	0	0	0	0
Homo sapiens	hsa-miR-5685	ACAGCCCAGCAGUUAUCACGGG	22	0.0153956	0	0	0	0
Homo sapiens	hsa-miR-5687	UUAGAACGUUUUAGGGUCAAAU	22	0.0148632	0	0	0	0
Homo sapiens	hsa-miR-5688	UAACAAACACCUGUAAAACAGC	22	0.16165	0	0	0	0
Homo sapiens	hsa-miR-5689	AGCAUACACCUGUAGUCCUAGA	22	0.0277156	0	0	0	0
Homo sapiens	hsa-miR-569	AGUUAAUGAAUCCUGGAAAGU	21	0.249574	0	0	0	0
Homo sapiens	hsa-miR-5690	UCAGCUACUACCUCUAUUAGG	21	0.00214292	0	0	0	0
Homo sapiens	hsa-miR-5691	UUGCUCUGAGCUCCGAGAAAGC	22	0.00506437	0	0	0	0
Homo sapiens	hsa-miR-5692a	CAAAUAAUACCACAGUGGGUGU	22	0.748464	0	0	0	0
Homo sapiens	hsa-miR-5692b	AAUAAUAUCACAGUAGGUGU	20	0.136805	0	0	0	0
Homo sapiens	hsa-miR-5692c	AAUAAUAUCACAGUAGGUGUAC	22	0.115785	0	0	0	0
Homo sapiens	hsa-miR-5693	GCAGUGGCUCUGAAAUGAACUC	22	0.207138	0	0	0	0
Homo sapiens	hsa-miR-5694	CAGAUCAUGGGACUGUCUCAG	21	0.239421	0	0	0	0
Homo sapiens	hsa-miR-5695	ACUCCAAGAAGAAUCUAGACAG	22	0.00570077	0	0	0	0
Homo sapiens	hsa-miR-5696	CUCAUUUAAGUAGUCUGAUGCC	22	0.0183144	0	0	0	0
Homo sapiens	hsa-miR-5697	UCAAGUAGUUUCAUGAUAAAGG	22	0.0368808	0	0	0	0
Homo sapiens	hsa-miR-5698	UGGGGGAGUGCAGUGAUUGUGG	22	0.886061	0	0	0	0
Homo sapiens	hsa-miR-5699-3p	UCCUGUCUUUCCUUGUUGGAGC	22	0.00271298	0	0	0	0
Homo sapiens	hsa-miR-5699-5p	UGCCCCAACAAGGAAGGACAAG	22	0.0898269	0	0	0	0
Homo sapiens	hsa-miR-570-3p	CGAAAACAGCAAUUACCUUUGC	22	0.00496207	0	0	0	0
Homo sapiens	hsa-miR-570-5p	AAAGGUAAUUGCAGUUUUUCCC	22	0.000151669	0	0	0	0
Homo sapiens	hsa-miR-5700	UAAUGCAUUAAAUUAUUGAAGG	22	0.0222447	0	0	0	0
Homo sapiens	hsa-miR-5701	UUAUUGUCACGUUCUGAUU	19	0.00820586	0	0	0	0
Homo sapiens	hsa-miR-5702	UGAGUCAGCAACAUAUCCCAUG	22	0.00268807	0	0	0	0
Homo sapiens	hsa-miR-5703	AGGAGAAGUCGGGAAGGU	18	0.755885	0	0	0	0
Homo sapiens	hsa-miR-5704	UUAGGCCAUCAUCCCAUUAUGC	22	0.00305229	0	0	0	0
Homo sapiens	hsa-miR-5705	UGUUUCGGGGCUCAUGGCCUGUG	23	0.102549	0	0	0	0
Homo sapiens	hsa-miR-5706	UUCUGGAUAACAUGCUGAAGCU	22	0.523993	0	0	0	0
Homo sapiens	hsa-miR-5707	ACGUUUGAAUGCUGUACAAGGC	22	0.129249	0	0	0	0
Homo sapiens	hsa-miR-5708	AUGAGCGACUGUGCCUGACC	20	0.0673338	0	0	0	0
Homo sapiens	hsa-miR-571	UGAGUUGGCCAUCUGAGUGAG	21	0.192498	0	0	0	0
Homo sapiens	hsa-miR-572	GUCCGCUCGGCGGUGGCCCA	20	0.0132285	0	0	0	0
Homo sapiens	hsa-miR-573	CUGAAGUGAUGUGUAACUGAUCAG	24	0.410414	0	0	0	0
Homo sapiens	hsa-miR-5739	GCGGAGAGAGAAUGGGGAGC	20	0.0860722	0	0	0	0
Homo sapiens	hsa-miR-574-3p	CACGCUCAUGCACACACCCACA	22	0.0685057	0	0	0	0
Homo sapiens	hsa-miR-574-5p	UGAGUGUGUGUGUGUGAGUGUGU	23	0.500001	0	0	0	0
Homo sapiens	hsa-miR-575	GAGCCAGUUGGACAGGAGC	19	0.266893	0	0	0	0
Homo sapiens	hsa-miR-576-3p	AAGAUGUGGAAAAAUUGGAAUC	22	0.164949	0	0	0	0
Homo sapiens	hsa-miR-576-5p	AUUCUAAUUUCUCCACGUCUUU	22	0.000231294	0	0	0	0
Homo sapiens	hsa-miR-577	UAGAUAAAAUAUUGGUACCUG	21	0.0136978	0	0	0	0
Homo sapiens	hsa-miR-578	CUUCUUGUGCUCUAGGAUUGU	21	0.139751	0	0	0	0
Homo sapiens	hsa-miR-5787	GGGCUGGGGCGCGGGGAGGU	20	0.993873	1	GGGCUGGGGCGCGGGGAGG	1	19
Homo sapiens	hsa-miR-579-3p	UUCAUUUGGUAUAAACCGCGAUU	23	0.0010009	0	0	0	0
Homo sapiens	hsa-miR-579-5p	UCGCGGUUUGUGCCAGAUGACG	22	0.0301438	0	0	0	0
Homo sapiens	hsa-miR-580-3p	UUGAGAAUGAUGAAUCAUUAGG	22	0.135564	0	0	0	0
Homo sapiens	hsa-miR-580-5p	UAAUGAUUCAUCAGACUCAGAU	22	0.0105176	0	0	0	0
Homo sapiens	hsa-miR-581	UCUUGUGUUCUCUAGAUCAGU	21	0.0514453	0	0	0	0
Homo sapiens	hsa-miR-582-3p	UAACUGGUUGAACAACUGAACC	22	0.511903	0	0	0	0
Homo sapiens	hsa-miR-582-5p	UUACAGUUGUUCAACCAGUUACU	23	0.305592	0	0	0	0
Homo sapiens	hsa-miR-583	CAAAGAGGAAGGUCCCAUUAC	21	0.013641	0	0	0	0
Homo sapiens	hsa-miR-584-3p	UCAGUUCCAGGCCAACCAGGCU	22	0.0500798	0	0	0	0
Homo sapiens	hsa-miR-584-5p	UUAUGGUUUGCCUGGGACUGAG	22	0.0164348	0	0	0	0
Homo sapiens	hsa-miR-585-3p	UGGGCGUAUCUGUAUGCUA	19	0.00447842	0	0	0	0
Homo sapiens	hsa-miR-585-5p	CUAGCACACAGAUACGCCCAGA	22	0.00932093	0	0	0	0
Homo sapiens	hsa-miR-586	UAUGCAUUGUAUUUUUAGGUCC	22	4.10202e-05	0	0	0	0
Homo sapiens	hsa-miR-587	UUUCCAUAGGUGAUGAGUCAC	21	0.00964569	0	0	0	0
Homo sapiens	hsa-miR-588	UUGGCCACAAUGGGUUAGAAC	21	0.489989	0	0	0	0
Homo sapiens	hsa-miR-589-3p	UCAGAACAAAUGCCGGUUCCCAGA	24	0.0016811	0	0	0	0
Homo sapiens	hsa-miR-589-5p	UGAGAACCACGUCUGCUCUGAG	22	0.0845886	0	0	0	0
Homo sapiens	hsa-miR-590-3p	UAAUUUUAUGUAUAAGCUAGU	21	0.000225349	0	0	0	0
Homo sapiens	hsa-miR-590-5p	GAGCUUAUUCAUAAAAGUGCAG	22	0.00724796	0	0	0	0
Homo sapiens	hsa-miR-591	AGACCAUGGGUUCUCAUUGU	20	0.0909022	0	0	0	0
Homo sapiens	hsa-miR-592	UUGUGUCAAUAUGCGAUGAUGU	22	0.0461368	0	0	0	0
Homo sapiens	hsa-miR-593-3p	UGUCUCUGCUGGGGUUUCU	19	0.147653	0	0	0	0
Homo sapiens	hsa-miR-593-5p	AGGCACCAGCCAGGCAUUGCUCAGC	25	0.0908412	0	0	0	0
Homo sapiens	hsa-miR-595	GAAGUGUGCCGUGGUGUGUCU	21	0.513853	0	0	0	0
Homo sapiens	hsa-miR-596	AAGCCUGCCCGGCUCCUCGGG	21	0.00997835	0	0	0	0
Homo sapiens	hsa-miR-597-3p	UGGUUCUCUUGUGGCUCAAGCGU	23	0.162432	0	0	0	0
Homo sapiens	hsa-miR-597-5p	UGUGUCACUCGAUGACCACUGU	22	0.134766	0	0	0	0
Homo sapiens	hsa-miR-598-3p	UACGUCAUCGUUGUCAUCGUCA	22	0.24234	0	0	0	0
Homo sapiens	hsa-miR-598-5p	GCGGUGAUCCCGAUGGUGUGAGC	23	0.0445233	0	0	0	0
Homo sapiens	hsa-miR-599	GUUGUGUCAGUUUAUCAAAC	20	0.0036681	0	0	0	0
Homo sapiens	hsa-miR-600	ACUUACAGACAAGAGCCUUGCUC	23	0.0248859	0	0	0	0
Homo sapiens	hsa-miR-601	UGGUCUAGGAUUGUUGGAGGAG	22	0.644433	1	GGUCUAGGAUUGUUGGAGG	2	19
Homo sapiens	hsa-miR-602	GACACGGGCGACAGCUGCGGCCC	23	0.110686	0	0	0	0
Homo sapiens	hsa-miR-603	CACACACUGCAAUUACUUUUGC	22	0.00328947	0	0	0	0
Homo sapiens	hsa-miR-604	AGGCUGCGGAAUUCAGGAC	19	0.266149	0	0	0	0
Homo sapiens	hsa-miR-605-3p	AGAAGGCACUAUGAGAUUUAGA	22	0.000481659	0	0	0	0
Homo sapiens	hsa-miR-605-5p	UAAAUCCCAUGGUGCCUUCUCCU	23	0.00342048	0	0	0	0
Homo sapiens	hsa-miR-606	AAACUACUGAAAAUCAAAGAU	21	0.0171175	0	0	0	0
Homo sapiens	hsa-miR-6068	CCUGCGAGUCUCCGGCGGUGG	21	0.0402158	0	0	0	0
Homo sapiens	hsa-miR-6069	GGGCUAGGGCCUGCUGCCCCC	21	0.011795	0	0	0	0
Homo sapiens	hsa-miR-607	GUUCAAAUCCAGAUCUAUAAC	21	0.00216104	0	0	0	0
Homo sapiens	hsa-miR-6070	CCGGUUCCAGUCCCUGGAG	19	0.00330934	0	0	0	0
Homo sapiens	hsa-miR-6071	UUCUGCUGCCGGCCAAGGC	19	0.111166	0	0	0	0
Homo sapiens	hsa-miR-6072	UCCUCAUCACACUGCACCUUAG	22	0.043487	0	0	0	0
Homo sapiens	hsa-miR-6073	GGUAGUGAGUUAUCAGCUAC	20	0.0168951	0	0	0	0
Homo sapiens	hsa-miR-6074	GAUAUUCAGAGGCUAGGUGG	20	0.00693012	0	0	0	0
Homo sapiens	hsa-miR-6075	ACGGCCCAGGCGGCAUUGGUG	21	0.112121	1	GGCCCAGGCGGCAUUGG	3	17
Homo sapiens	hsa-miR-6076	AGCAUGACAGAGGAGAGGUGG	21	0.101992	0	0	0	0
Homo sapiens	hsa-miR-6077	GGGAAGAGCUGUACGGCCUUC	21	0.126151	0	0	0	0
Homo sapiens	hsa-miR-6078	CCGCCUGAGCUAGCUGUGG	19	0.0663942	0	0	0	0
Homo sapiens	hsa-miR-6079	UUGGAAGCUUGGACCAACUAGCUG	24	0.300831	0	0	0	0
Homo sapiens	hsa-miR-608	AGGGGUGGUGUUGGGACAGCUCCGU	25	0.846023	0	0	0	0
Homo sapiens	hsa-miR-6080	UCUAGUGCGGGCGUUCCCG	19	0.0178766	0	0	0	0
Homo sapiens	hsa-miR-6081	AGGAGCAGUGCCGGCCAAGGCGCC	24	0.209218	0	0	0	0
Homo sapiens	hsa-miR-6082	GAAUACGUCUGGUUGAUCC	19	0.385607	0	0	0	0
Homo sapiens	hsa-miR-6083	CUUAUAUCAGAGGCUGUGGG	20	0.00597078	0	0	0	0
Homo sapiens	hsa-miR-6084	UUCCGCCAGUCGGUGGCCGG	20	0.0204674	0	0	0	0
Homo sapiens	hsa-miR-6085	AAGGGGCUGGGGGAGCACA	19	0.994137	0	0	0	0
Homo sapiens	hsa-miR-6086	GGAGGUUGGGAAGGGCAGAG	20	0.901715	1	GGAGGUUGGGAAGGG	1	15
Homo sapiens	hsa-miR-6088	AGAGAUGAAGCGGGGGGGCG	20	0.863385	0	0	0	0
Homo sapiens	hsa-miR-6089	GGAGGCCGGGGUGGGGCGGGGCGG	24	0.989794	1	GGAGGCCGGGGUGGGGCGGGGCGG	1	24
Homo sapiens	hsa-miR-609	AGGGUGUUUCUCUCAUCUCU	20	0.0463504	0	0	0	0
Homo sapiens	hsa-miR-6090	GGGGAGCGAGGGGCGGGGC	19	0.990645	0	0	0	0
Homo sapiens	hsa-miR-610	UGAGCUAAAUGUGUGCUGGGA	21	0.420979	0	0	0	0
Homo sapiens	hsa-miR-611	GCGAGGACCCCUCGGGGUCUGAC	23	0.0833809	0	0	0	0
Homo sapiens	hsa-miR-612	GCUGGGCAGGGCUUCUGAGCUCCUU	25	0.211723	0	0	0	0
Homo sapiens	hsa-miR-6124	GGGAAAAGGAAGGGGGAGGA	20	0.993268	1	GGGAAAAGGAAGGGGGAGG	1	19
Homo sapiens	hsa-miR-6125	GCGGAAGGCGGAGCGGCGGA	20	0.646692	1	GGAAGGCGGAGCGGCGG	3	17
Homo sapiens	hsa-miR-6126	GUGAAGGCCCGGCGGAGA	18	0.0309493	0	0	0	0
Homo sapiens	hsa-miR-6127	UGAGGGAGUGGGUGGGAGG	19	0.976495	1	GGGAGUGGGUGGGAGG	4	16
Homo sapiens	hsa-miR-6128	ACUGGAAUUGGAGUCAAAA	19	0.100024	0	0	0	0
Homo sapiens	hsa-miR-6129	UGAGGGAGUUGGGUGUAUA	19	0.460729	0	0	0	0
Homo sapiens	hsa-miR-613	AGGAAUGUUCCUUCUUUGCC	20	0.00385689	0	0	0	0
Homo sapiens	hsa-miR-6130	UGAGGGAGUGGAUUGUAUG	19	0.110006	0	0	0	0
Homo sapiens	hsa-miR-6131	GGCUGGUCAGAUGGGAGUG	19	0.429718	0	0	0	0
Homo sapiens	hsa-miR-6132	AGCAGGGCUGGGGAUUGCA	19	0.933873	0	0	0	0
Homo sapiens	hsa-miR-6133	UGAGGGAGGAGGUUGGGUA	19	0.965629	1	GGGAGGAGGUUGGG	4	14
Homo sapiens	hsa-miR-6134	UGAGGUGGUAGGAUGUAGA	19	0.55436	0	0	0	0
Homo sapiens	hsa-miR-614	GAACGCCUGUUCUUGCCAGGUGG	23	0.213308	0	0	0	0
Homo sapiens	hsa-miR-615-3p	UCCGAGCCUGGGUCUCCCUCUU	22	0.00255989	0	0	0	0
Homo sapiens	hsa-miR-615-5p	GGGGGUCCCCGGUGCUCGGAUC	22	0.20827	1	GGGGGUCCCCGGUGCUCGG	1	19
Homo sapiens	hsa-miR-616-3p	AGUCAUUGGAGGGUUUGAGCAG	22	0.0601478	0	0	0	0
Homo sapiens	hsa-miR-616-5p	ACUCAAAACCCUUCAGUGACUU	22	0.00550445	0	0	0	0
Homo sapiens	hsa-miR-6165	CAGCAGGAGGUGAGGGGAG	19	0.924163	0	0	0	0
Homo sapiens	hsa-miR-617	AGACUUCCCAUUUGAAGGUGGC	22	0.00100252	0	0	0	0
Homo sapiens	hsa-miR-618	AAACUCUACUUGUCCUUCUGAGU	23	0.0099124	0	0	0	0
Homo sapiens	hsa-miR-619-3p	GACCUGGACAUGUUUGUGCCCAGU	24	0.0218989	0	0	0	0
Homo sapiens	hsa-miR-619-5p	GCUGGGAUUACAGGCAUGAGCC	22	0.506052	0	0	0	0
Homo sapiens	hsa-miR-620	AUGGAGAUAGAUAUAGAAAU	20	0.0112746	0	0	0	0
Homo sapiens	hsa-miR-621	GGCUAGCAACAGCGCUUACCU	21	0.162419	0	0	0	0
Homo sapiens	hsa-miR-622	ACAGUCUGCUGAGGUUGGAGC	21	0.430757	0	0	0	0
Homo sapiens	hsa-miR-623	AUCCCUUGCAGGGGCUGUUGGGU	23	0.527341	0	0	0	0
Homo sapiens	hsa-miR-624-3p	CACAAGGUAUUGGUAUUACCU	21	0.00379952	0	0	0	0
Homo sapiens	hsa-miR-624-5p	UAGUACCAGUACCUUGUGUUCA	22	0.101819	0	0	0	0
Homo sapiens	hsa-miR-625-3p	GACUAUAGAACUUUCCCCCUCA	22	4.20511e-05	0	0	0	0
Homo sapiens	hsa-miR-625-5p	AGGGGGAAAGUUCUAUAGUCC	21	0.13295	0	0	0	0
Homo sapiens	hsa-miR-626	AGCUGUCUGAAAAUGUCUU	19	0.120019	0	0	0	0
Homo sapiens	hsa-miR-627-3p	UCUUUUCUUUGAGACUCACU	20	8.75523e-05	0	0	0	0
Homo sapiens	hsa-miR-627-5p	GUGAGUCUCUAAGAAAAGAGGA	22	0.0286681	0	0	0	0
Homo sapiens	hsa-miR-628-3p	UCUAGUAAGAGUGGCAGUCGA	21	0.0652804	0	0	0	0
Homo sapiens	hsa-miR-628-5p	AUGCUGACAUAUUUACUAGAGG	22	0.00152712	0	0	0	0
Homo sapiens	hsa-miR-629-3p	GUUCUCCCAACGUAAGCCCAGC	22	0.0027855	0	0	0	0
Homo sapiens	hsa-miR-629-5p	UGGGUUUACGUUGGGAGAACU	21	0.363781	0	0	0	0
Homo sapiens	hsa-miR-630	AGUAUUCUGUACCAGGGAAGGU	22	0.0605319	0	0	0	0
Homo sapiens	hsa-miR-631	AGACCUGGCCCAGACCUCAGC	21	0.00258902	0	0	0	0
Homo sapiens	hsa-miR-632	GUGUCUGCUUCCUGUGGGA	19	0.193499	0	0	0	0
Homo sapiens	hsa-miR-633	CUAAUAGUAUCUACCACAAUAAA	23	0.0282172	0	0	0	0
Homo sapiens	hsa-miR-634	AACCAGCACCCCAACUUUGGAC	22	0.00289779	0	0	0	0
Homo sapiens	hsa-miR-635	ACUUGGGCACUGAAACAAUGUCC	23	0.201076	0	0	0	0
Homo sapiens	hsa-miR-636	UGUGCUUGCUCGUCCCGCCCGCA	23	0.004371	0	0	0	0
Homo sapiens	hsa-miR-637	ACUGGGGGCUUUCGGGCUCUGCGU	24	0.436	0	0	0	0
[truncated: 46,886 more rows]

## Sheet: Organism-wise stats
Organism	Num. miRNAs	Num. seq. with G2L12	Num. seq with G4NN > 0.5
Homo sapiens	2656	191	478
Acacia auriculiformis	7	0	2
Acacia mangium	3	0	0
Acyrthosiphon pisum	103	1	10
Aedes aegypti	164	0	11
Aegilops tauschii	173	3	31
Alligator mississippiensis	373	1	38
Amborella trichopoda	129	1	10
Amphimedon queenslandica	16	3	3
Anas platyrhynchos	8	0	1
Anolis carolinensis	449	3	44
Anopheles gambiae	163	0	10
Apis mellifera	262	11	36
Aquilegia caerulea	45	0	2
Arabidopsis lyrata	384	0	24
Arabidopsis thaliana	428	9	50
Arachis hypogaea	32	0	1
Artibeus jamaicensis	19	0	0
Ascaris suum	189	0	11
Asparagus officinalis	101	0	7
Astatotilapia burtoni	236	0	22
Ateles geoffroyi	54	0	2
Avicennia marina	3	0	0
Bactrocera dorsalis	78	0	3
Bandicoot papillomatosis	2	0	0
Biston betularia	2	0	0
BK polyomavirus	2	0	0
Bombyx mori	563	3	33
Bos taurus	1030	51	141
Bovine foamy	4	0	0
Bovine herpesvirus	17	4	5
Bovine leukemia	10	3	2
Brachypodium distachyon	525	3	45
Branchiostoma belcheri	173	2	20
Branchiostoma floridae	187	4	15
Brassica napus	92	0	16
Brassica oleracea	11	0	1
Brassica rapa	157	0	17
Brugia malayi	166	1	8
Bruguiera cylindrica	4	0	0
Bruguiera gymnorhiza	4	0	0
Caenorhabditis brenneri	152	0	9
Caenorhabditis briggsae	163	1	14
Caenorhabditis elegans	437	4	28
Caenorhabditis remanei	182	0	17
Callithrix jacchus	470	9	41
Camelina sativa	112	1	9
Canis familiaris	453	7	42
Capitella teleta	134	0	7
Capra hircus	436	6	37
Carica papaya	81	1	23
Cavia porcellus	656	11	63
Cerebratulus lacteus	2	0	0
Chlamydomonas reinhardtii	86	7	23
Chrysemys picta	405	1	42
Ciona intestinalis	550	4	50
Ciona savignyi	25	0	4
Citrus clementina	5	0	1
Citrus reticulata	4	0	1
Citrus sinensis	246	4	29
Citrus trifoliata	6	0	1
Columba livia	420	2	44
Cricetulus griseus	351	6	38
Cucumis melo	120	0	18
Cucumis sativus	5	1	1
Culex quinquefasciatus	93	0	5
Cunninghamia lanceolata	4	0	1
Cynara cardunculus	57	0	5
Cyprinus carpio	146	0	11
Danio rerio	374	1	37
Daphnia pulex	45	0	2
Dasypus novemcinctus	602	11	52
Daubentonia madagascariensis	67	2	8
Dictyostelium discoideum	20	0	1
Digitalis purpurea	13	0	0
Dinoponera quadriceps	197	1	15
Drosophila ananassae	75	0	4
Drosophila erecta	120	0	12
Drosophila grimshawi	72	0	4
Drosophila melanogaster	469	3	37
Drosophila mojavensis	71	0	4
Drosophila persimilis	69	0	4
Drosophila pseudoobscura	272	0	13
Drosophila sechellia	120	0	7
Drosophila simulans	213	1	14
Drosophila virilis	328	0	18
Drosophila willistoni	72	0	4
Drosophila yakuba	103	0	7
Duck enteritis	33	2	1
Echinococcus granulosus	218	8	27
Echinococcus multilocularis	68	0	3
Ectocarpus siliculosus	77	1	7
Elaeis guineensis	6	0	0
Electrophorus electricus	34	0	1
Epstein Barr	44	0	10
Eptesicus fuscus	426	13	48
Equus caballus	690	22	71
Eugenia uniflora	74	0	6
Fasciola hepatica	38	0	1
Festuca arundinacea	15	0	0
Fragaria vesca	131	0	11
Fugu rubripes	108	0	7
Gadus morhua	516	0	35
Gallus gallus	1235	72	224
Glottidia pyramidata	1	0	0
Glycine max	756	7	84
Glycine soja	13	0	1
Gorilla gorilla	371	6	38
Gossypium arboreum	1	0	0
Gossypium herbaceum	1	0	0
Gossypium hirsutum	80	1	7
Gossypium raimondii	296	5	37
Gyrodactylus salaris	120	0	5
Haemonchus contortus	194	2	17
Haliotis rufescens	5	0	0
Helianthus annuus	7	0	2
Helianthus argophyllus	3	0	0
Helianthus ciliaris	3	0	0
Helianthus exilis	2	0	2
Helianthus paradoxus	3	0	0
Helianthus petiolaris	3	0	0
Helianthus tuberosus	16	0	0
Heliconius melpomene	97	1	9
Heligmosomoides polygyrus	486	7	36
Herpes B	15	4	3
Herpes Simplex	51	7	16
Herpesvirus of	28	2	4
Herpesvirus saimiri	6	0	0
Hevea brasiliensis	30	0	5
Hippoglossus hippoglossus	36	0	3
Hordeum vulgare	71	4	10
Human cytomegalovirus	26	1	3
Human herpesvirus	8	0	0
Human immunodeficiency	4	0	1
Hydra magnipapillata	20	0	0
Ictalurus punctatus	205	0	15
Infectious laryngotracheitis	10	0	1
Ixodes scapularis	49	0	3
JC polyomavirus	2	0	0
Kaposi sarcoma-associated	25	1	3
Lagothrix lagotricha	45	0	2
Lemur catta	15	0	0
Leucosolenia complicata	1	0	1
Linum usitatissimum	124	0	18
Locusta migratoria	14	0	1
Lottia gigantea	64	0	8
Lotus japonicus	365	2	31
Lytechinus variegatus	49	0	8
Macaca mulatta	912	24	96
Macaca nemestrina	70	0	4
Macropus eugenii	3	0	0
Malus domestica	322	0	29
Manduca sexta	93	0	8
Manihot esculenta	175	0	12
Mareks disease	62	1	8
Marsupenaeus japonicus	7	0	2
Medicago truncatula	756	9	95
Melibe leonina	176	0	14
Merkel cell	2	0	0
Mesocestoides corti	45	0	1
Metriaclima zebra	184	0	19
Microcebus murinus	109	0	8
Monodelphis domestica	1138	22	130
Mouse cytomegalovirus	29	1	5
Mouse gammaherpesvirus	28	1	3
Mus musculus	1978	101	323
Nasonia giraulti	32	0	2
Nasonia longicornis	28	0	2
Nasonia vitripennis	53	0	3
Nematostella vectensis	140	0	6
Neolamprologus brichardi	182	0	18
Nicotiana tabacum	164	0	17
Nomascus leucogenys	135	0	9
Oikopleura dioica	63	0	8
Ophiophagus hannah	343	0	37
Oreochromis niloticus	695	1	59
Ornithorhynchus anatinus	640	11	77
Oryctolagus cuniculus	579	9	45
Oryza sativa	738	9	95
Oryzias latipes	146	0	12
Otolemur garnettii	127	0	10
Ovis aries	153	2	10
Paeonia lactiflora	15	0	2
Pan paniscus	157	0	9
Pan troglodytes	589	17	68
Panagrellus redivivus	394	2	37
Panax ginseng	32	0	4
Papio hamadryas	86	1	10
Paralichthys olivaceus	38	0	5
Parasteatoda tepidariorum	257	0	13
Patiria miniata	50	0	9
Petromyzon marinus	302	5	31
Phaeodactylum tricornutum	13	0	1
Phaseolus vulgaris	10	0	2
Physcomitrella patens	298	1	26
Phytophthora infestans	2	0	0
Phytophthora ramorum	4	0	0
Phytophthora sojae	4	0	2
Picea abies	600	6	51
Pinus densata	29	1	2
Pinus taeda	36	0	1
Plutella xylostella	127	2	17
Polistes canadensis	140	3	15
Pongo pygmaeus	645	19	74
Populus euphratica	4	0	1
Populus trichocarpa	401	3	41
Pristionchus pacificus	550	2	26
Prunus persica	214	2	35
Pseudorabies virus	18	4	6
Pteropus alecto	651	9	68
Pundamilia nyererei	182	0	21
Pygathrix bieti	9	0	0
Python bivittatus	307	3	33
Raccoon polyomavirus	2	0	1
Rattus norvegicus	764	15	76
Rehmannia glutinosa	37	0	0
Rhesus lymphocryptovirus	70	2	12
Rhesus monkey	11	0	3
Rhipicephalus microplus	24	0	1
Ricinus communis	63	0	12
Saccharum officinarum	16	0	2
Saccharum sp.	20	0	2
Saccoglossus kowalevskii	114	2	16
Saguinus labiatus	40	0	1
Saimiri boliviensis	36	0	1
Salicornia europaea	31	1	7
Salmo salar	497	1	49
Salvia miltiorrhiza	1	0	0
Salvia sclarea	18	0	3
Sarcophilus harrisii	62	0	5
Schistosoma japonicum	79	0	8
Schistosoma mansoni	225	1	12
Schmidtea mediterranea	257	0	16
Selaginella moellendorffii	64	0	3
Simian foamy	13	0	1
Simian virus	2	0	0
Solanum lycopersicum	147	1	15
Solanum tuberosum	343	3	21
Sorghum bicolor	241	1	24
Spodoptera frugiperda	221	1	16
Strigamia maritima	4	0	0
Strongylocentrotus purpuratus	70	2	10
Strongyloides ratti	208	0	18
Sus scrofa	457	9	52
Sycon ciliatum	2	0	0
Symbiodinium microadriaticum	15	0	0
Symphalangus syndactylus	10	0	0
Taeniopygia guttata	334	9	41
Terebratulina retusa	1	0	0
Tetranychus urticae	92	1	8
Tetraodon nigroviridis	109	0	7
Theobroma cacao	82	0	9
Torque teno	2	1	1
Tribolium castaneum	590	11	54
Triops cancriformis	160	0	8
Triticum aestivum	125	2	13
Triticum turgidum	1	0	0
Tupaia chinensis	162	2	14
Vigna unguiculata	18	0	3
Vitis vinifera	186	3	27
Vriesea carinata	65	0	6
Xenopus laevis	247	0	19
Xenopus tropicalis	182	0	16
Xenoturbella bocki	8	0	1
Zea mays	325	1	37
